# Supplementary material for: Global scenarios of residential heating and cooling energy demand and CO2 emissions
Source: Springer Nature journal article supplement (doi:10.1007/s10584-021-03229-3), 2021-10-01
Supplement: MOESM1 [file 10584_2021_3229_MOESM1_ESM.xlsx]

## Sheet: metadata
Supplementary data
Global scenarios of residential heating and cooling energy demand and CO2 emissions
List of sheets	Notes
stock_by_cohort	Housing stock - by housing cohort
stock_by_fuel	Housing stock - by heating fuel
floor_by_cohort	Floorspace - by housing cohort
floor_by_fuel	Floorspace - by heating fuel
en_heat_by_cohort	Final energy demand for space heating - by housing cohort
en_heat_by_fuel	Final energy demand for space heating - by heating fuel
en_cool_by_cohort	Final energy demand for space cooling - by housing cohort
ems_heat_by_cohort	CO2 Emissions for space heating - by housing cohort
ems_heat_by_fuel	CO2 Emissions for space heating - by heating fuel
ems_cool_by_cohort	CO2 Emissions for space cooling - by housing cohort
Region definition
Region	Name
WEU	Western Europe
EEU	Central and Eastern Europe
NAM	North America
FSU	Former Soviet Union
PAO	Pacific OECD
CPA	Centrally Planned Asia
SAS	South Asia
AFR	Sub-Saharan Africa
LAC	Latin America and the Caribbean
MEA	Middle East and North Africa
PAS	Other Pacific Asia

## Sheet: stock_by_cohort
Scenario	Region	Cohort	Variable	Unit	2015	2020	2025	2030	2035	2040	2045	2050
SSP1	AFR	Slum	Housing stock	Million units	14.1933	17.4589	19.8519	21.708	22.87	23.1997	22.6533	21.3575
SSP1	AFR	Existing <1945	Housing stock	Million units	14.2492	13.186	12.3009	11.4991	10.8052	10.2037	9.66048	9.16132
SSP1	AFR	Existing 1946-1990	Housing stock	Million units	50.3176	45.4289	40.8697	36.2952	31.9505	27.854	23.9439	20.2458
SSP1	AFR	Existing 1991-2015	Housing stock	Million units	90.1397	86.8321	83.1555	78.6609	73.6658	68.3739	62.7316	56.7756
SSP1	AFR	New - standard	Housing stock	Million units	0	17.0957	38.4422	60.7343	84.7836	110.165	136.249	162.391
SSP1	AFR	New - advanced	Housing stock	Million units	0	0	0.00034	0.17361	0.42593	0.77914	1.27797	1.94147
SSP1	AFR	Renovated - standard	Housing stock	Million units	0	1.26741	1.9615	2.82235	3.42476	3.71523	4.01345	4.45344
SSP1	AFR	Renovated - advanced	Housing stock	Million units	0	0	0	0	0	0	0	0
SSP1	CPA	Slum	Housing stock	Million units	51.8132	39.9526	27.141	16.5064	8.65157	3.61338	2.76607	3.62963
SSP1	CPA	Existing <1945	Housing stock	Million units	42.5601	36.1169	24.4946	21.2966	19.4812	17.7264	16.1383	14.9069
SSP1	CPA	Existing 1946-1990	Housing stock	Million units	75.6841	47.5725	23.1227	10.0892	3.03614	1.34432	0.7114	0.35692
SSP1	CPA	Existing 1991-2015	Housing stock	Million units	259.868	221.098	163.901	122.188	84.3246	50.3674	24.9095	12.0702
SSP1	CPA	New - standard	Housing stock	Million units	0	66.1639	129.903	182.287	224.567	255.141	274.134	282.706
SSP1	CPA	New - advanced	Housing stock	Million units	0	0.00618	0.28659	4.97255	10.0172	14.979	19.4218	23.1599
SSP1	CPA	Renovated - standard	Housing stock	Million units	0	21.641	65.2306	73.8757	77.4121	80.0769	82.0467	82.9914
SSP1	CPA	Renovated - advanced	Housing stock	Million units	0	0.00309	0.03099	0.04149	0.0522	0.06155	0.06442	0.0661
SSP1	EEU	Existing <1945	Housing stock	Million units	18.7304	16.0722	13.1176	11.7337	10.5059	9.41854	8.43059	7.48939
SSP1	EEU	Existing 1946-1990	Housing stock	Million units	14.0751	11.4582	8.14063	6.33863	4.74613	3.32601	2.09473	1.13001
SSP1	EEU	Existing 1991-2015	Housing stock	Million units	14.1156	13.0314	11.1546	10.0979	9.05469	7.97847	6.82146	5.55553
SSP1	EEU	New - standard	Housing stock	Million units	0	0	0	0	0	0	0	0
SSP1	EEU	New - advanced	Housing stock	Million units	0	3.84802	7.13917	10.3173	13.3545	16.2487	18.9617	21.4251
SSP1	EEU	Renovated - standard	Housing stock	Million units	0	0.89263	3.02967	3.45379	3.69052	3.83193	3.95896	4.13833
SSP1	EEU	Renovated - advanced	Housing stock	Million units	0	1.45343	3.93298	4.19436	4.31017	4.34602	4.35639	4.39087
SSP1	FSU	Existing <1945	Housing stock	Million units	19.6554	15.6015	12.8973	11.1844	9.70059	8.51118	7.74967	7.20552
SSP1	FSU	Existing 1946-1990	Housing stock	Million units	39.1791	32.0989	25.4432	20.1753	15.7352	12.0396	9.12146	6.73085
SSP1	FSU	Existing 1991-2015	Housing stock	Million units	38.1139	34.9108	31.6947	28.852	25.761	22.502	19.315	16.2583
SSP1	FSU	New - standard	Housing stock	Million units	0	8.61068	15.05	19.818	24.3415	28.5803	32.3501	35.5254
SSP1	FSU	New - advanced	Housing stock	Million units	0	0.07927	0.41481	2.07164	3.80836	5.58704	7.37081	9.09325
SSP1	FSU	Renovated - standard	Housing stock	Million units	0	1.69466	3.58956	4.68458	5.66254	6.46579	6.9225	7.18331
SSP1	FSU	Renovated - advanced	Housing stock	Million units	0	3.15277	6.36641	7.57923	8.46584	9.05621	9.30349	9.38457
SSP1	LAC	Slum	Housing stock	Million units	18.8496	19.8803	19.6964	18.4817	16.4538	13.8417	10.9203	7.98324
SSP1	LAC	Existing <1945	Housing stock	Million units	9.05292	6.94985	5.81639	4.8479	4.00862	3.30435	2.76868	2.3726
SSP1	LAC	Existing 1946-1990	Housing stock	Million units	52.4714	44.504	39.2911	34.2561	29.3603	24.6591	20.4432	16.7946
SSP1	LAC	Existing 1991-2015	Housing stock	Million units	80.0717	73.4855	69.392	64.9628	59.9608	54.4335	48.6839	42.8736
SSP1	LAC	New - standard	Housing stock	Million units	0	13.6782	27.5088	41.293	55.1468	68.5264	80.9669	92.0251
SSP1	LAC	New - advanced	Housing stock	Million units	0	2e-05	0.00186	0.40889	1.02531	1.87287	2.89635	4.04634
SSP1	LAC	Renovated - standard	Housing stock	Million units	0	7.13007	8.95949	10.4717	12.1037	13.869	15.4379	16.687
SSP1	LAC	Renovated - advanced	Housing stock	Million units	0	0	0	0	0	0	0	0
SSP1	MEA	Slum	Housing stock	Million units	10.9031	12.255	12.9047	13.0664	12.7855	12.0756	10.9575	9.53759
SSP1	MEA	Existing <1945	Housing stock	Million units	6.49347	5.19753	4.32383	3.55087	2.88337	2.42675	2.16288	1.95982
SSP1	MEA	Existing 1946-1990	Housing stock	Million units	29.3058	24.2044	20.2732	16.4569	12.8608	9.86906	7.77488	6.26606
SSP1	MEA	Existing 1991-2015	Housing stock	Million units	47.2177	43.1187	39.8503	36.3266	32.019	27.3298	22.947	19.229
SSP1	MEA	New - standard	Housing stock	Million units	0	10.3251	20.5692	30.2543	39.7411	48.8094	57.3844	65.2255
SSP1	MEA	New - advanced	Housing stock	Million units	0	9e-05	0.00319	0.54111	1.45707	2.77672	4.22409	5.71278
SSP1	MEA	Renovated - standard	Housing stock	Million units	0	4.98062	8.3279	11.4352	14.9742	18.167	20.3773	21.7096
SSP1	MEA	Renovated - advanced	Housing stock	Million units	0	0	0	0	0	0	0	0
SSP1	NAM	Existing <1945	Housing stock	Million units	35.5094	32.1043	26.8498	20.645	16.5491	13.8791	12.289	11.1488
SSP1	NAM	Existing 1946-1990	Housing stock	Million units	50.123	46.3196	39.6457	30.969	24.2189	19.5932	16.7444	13.8953
SSP1	NAM	Existing 1991-2015	Housing stock	Million units	60.043	56.5059	49.1499	39.4828	33.4487	30.0772	28.0511	26.1839
SSP1	NAM	New - standard	Housing stock	Million units	0	6.68367	12.5601	17.0598	21.7018	26.51	31.6001	36.9905
SSP1	NAM	New - advanced	Housing stock	Million units	0	3.16301	7.65774	14.0093	20.7469	27.8535	35.1025	42.5089
SSP1	NAM	Renovated - standard	Housing stock	Million units	0	3.60062	11.0356	20.7088	26.7505	29.8421	31.1193	32.0805
SSP1	NAM	Renovated - advanced	Housing stock	Million units	0	3.68315	11.4533	21.5722	27.024	28.9068	29.2496	29.4314
SSP1	PAO	Existing <1945	Housing stock	Million units	12.2918	10.1118	8.93895	7.8998	6.9373	6.03984	5.23316	4.50701
SSP1	PAO	Existing 1946-1990	Housing stock	Million units	24.0013	21.8499	20.3436	18.8766	17.3754	15.8382	14.3164	12.8204
SSP1	PAO	Existing 1991-2015	Housing stock	Million units	29.0228	27.2653	26.2624	25.2275	24.0773	22.7602	21.3063	19.7259
SSP1	PAO	New - standard	Housing stock	Million units	0	4.80335	8.40764	11.5534	14.5272	17.3697	20.0916	22.6795
SSP1	PAO	New - advanced	Housing stock	Million units	0	0.00223	0.01628	0.25959	0.49797	0.73177	0.95444	1.16535
SSP1	PAO	Renovated - standard	Housing stock	Million units	0	1.45487	1.69666	1.85688	2.11262	2.53438	3.05267	3.66614
SSP1	PAO	Renovated - advanced	Housing stock	Million units	0	0.4176	0.47065	0.50543	0.57107	0.66979	0.76916	0.86656
SSP1	PAS	Slum	Housing stock	Million units	1.65261	1.25139	0.92917	0.68611	0.51437	0.39894	0.38523	0.38017
SSP1	PAS	Existing <1945	Housing stock	Million units	9.16081	8.5991	8.20194	7.89044	7.63494	7.41848	7.22894	7.05723
SSP1	PAS	Existing 1946-1990	Housing stock	Million units	35.6362	28.8146	22.928	17.8286	13.5279	10.0056	7.23537	5.09089
SSP1	PAS	Existing 1991-2015	Housing stock	Million units	87.13	80.5957	72.9813	64.5187	55.6314	46.7774	38.3533	30.6533
SSP1	PAS	New - standard	Housing stock	Million units	0	15.1639	31.1079	46.0361	60.6977	74.4708	86.8253	97.3244
SSP1	PAS	New - advanced	Housing stock	Million units	0	0.04034	0.96607	2.97298	4.91603	6.70799	8.28323	9.60757
SSP1	PAS	Renovated - standard	Housing stock	Million units	0	1.1417	1.46922	1.5802	1.64072	1.68598	1.72098	1.74877
SSP1	PAS	Renovated - advanced	Housing stock	Million units	0	7e-05	0.0001	0.00012	0.00012	0.00012	0.00013	0.00015
SSP1	SAS	Slum	Housing stock	Million units	3.84085	5.04426	5.95209	6.655	7.09898	7.23594	7.05714	6.61668
SSP1	SAS	Existing <1945	Housing stock	Million units	34.8256	31.9933	29.7307	27.7003	25.8612	24.2168	22.7038	21.2914
SSP1	SAS	Existing 1946-1990	Housing stock	Million units	120.13	109.185	98.9048	88.6353	78.5323	68.8317	59.5458	50.7929
SSP1	SAS	Existing 1991-2015	Housing stock	Million units	175.267	169.225	162.669	154.685	145.42	135.174	124.059	112.314
SSP1	SAS	New - standard	Housing stock	Million units	0	24.1842	51.2289	78.312	106.889	136.32	166.096	195.05
SSP1	SAS	New - advanced	Housing stock	Million units	0	0.16401	0.58108	1.57746	2.70079	3.93124	5.3067	6.78038
SSP1	SAS	Renovated - standard	Housing stock	Million units	0	0.71085	1.03442	1.28525	1.49914	1.71432	1.95791	2.23433
SSP1	SAS	Renovated - advanced	Housing stock	Million units	0	0.03445	0.03579	0.10251	0.24335	0.3451	0.42681	0.55863
SSP1	WEU	Existing <1945	Housing stock	Million units	63.4112	54.1702	41.6516	31.6385	26.418	23.0091	20.2928	18.1371
SSP1	WEU	Existing 1946-1990	Housing stock	Million units	56.2913	47.8621	36.4381	26.8226	20.1708	15.4769	12.2427	9.3771
SSP1	WEU	Existing 1991-2015	Housing stock	Million units	82.0221	77.2216	70.3912	64.1658	58.5403	51.9366	44.5232	37.1082
SSP1	WEU	New - standard	Housing stock	Million units	0	0	0	0	0	0	0	0
SSP1	WEU	New - advanced	Housing stock	Million units	0	17.0352	31.6154	46.3432	61.4309	76.89	92.4745	107.949
SSP1	WEU	Renovated - standard	Housing stock	Million units	0	4.39293	14.1298	22.553	26.4675	29.328	32.0484	34.3961
SSP1	WEU	Renovated - advanced	Housing stock	Million units	0	5.68311	16.4283	23.5571	26.2275	27.8488	29.206	30.167
SSP2	AFR	Slum	Housing stock	Million units	14.1933	17.8501	20.8546	23.5581	25.8166	27.4652	28.3688	28.4891
SSP2	AFR	Existing <1945	Housing stock	Million units	14.2492	13.1976	12.338	11.564	10.8591	10.2147	9.64566	9.14426
SSP2	AFR	Existing 1946-1990	Housing stock	Million units	50.3176	45.4993	41.073	36.6339	32.1991	27.8279	23.7704	20.0605
SSP2	AFR	Existing 1991-2015	Housing stock	Million units	90.1397	86.933	83.4399	79.2234	74.2458	68.5214	62.4776	56.3621
SSP2	AFR	New - standard	Housing stock	Million units	0	15.9781	35.606	55.7089	76.937	99.0074	121.569	144.288
SSP2	AFR	New - advanced	Housing stock	Million units	0	0	2e-05	0.00815	0.01703	0.02602	0.03698	0.05002
SSP2	AFR	Renovated - standard	Housing stock	Million units	0	1.08091	1.40814	1.76307	2.42296	3.46662	4.34204	4.97087
SSP2	AFR	Renovated - advanced	Housing stock	Million units	0	0	0	0	0	0	0	0
SSP2	CPA	Slum	Housing stock	Million units	51.8132	48.9349	43.0727	36.7587	30.476	24.5026	18.9909	13.9703
SSP2	CPA	Existing <1945	Housing stock	Million units	42.5601	35.9569	29.5935	22.4016	19.8735	18.6306	17.3327	15.968
SSP2	CPA	Existing 1946-1990	Housing stock	Million units	75.6841	47.6888	26.1981	11.5171	3.29987	1.35533	0.69709	0.35057
SSP2	CPA	Existing 1991-2015	Housing stock	Million units	259.868	221.093	176.242	127.522	87.3989	53.2173	25.7769	11.352
SSP2	CPA	New - standard	Housing stock	Million units	0	57.0592	113.853	165.568	210.057	245.125	270.03	285.143
SSP2	CPA	New - advanced	Housing stock	Million units	0	0.00098	0.07647	0.89568	1.9409	3.13564	4.38192	5.57533
SSP2	CPA	Renovated - standard	Housing stock	Million units	0	21.6441	43.4529	65.2961	71.8668	74.2354	75.64	76.5182
SSP2	CPA	Renovated - advanced	Housing stock	Million units	0	0	0	0	0	0	0	0
SSP2	EEU	Existing <1945	Housing stock	Million units	18.7304	16.1078	14.0078	12.4592	11.1323	9.93454	8.86257	7.91717
SSP2	EEU	Existing 1946-1990	Housing stock	Million units	14.0751	11.3927	8.83344	6.83002	5.13333	3.65598	2.39471	1.37875
SSP2	EEU	Existing 1991-2015	Housing stock	Million units	14.1156	13.0613	11.8882	10.8244	9.75327	8.58566	7.31857	6.02725
SSP2	EEU	New - standard	Housing stock	Million units	0	0.23234	0.44066	0.65366	0.85227	1.03672	1.20288	1.34746
SSP2	EEU	New - advanced	Housing stock	Million units	0	3.61567	6.69851	9.66368	12.5023	15.212	17.7588	20.0777
SSP2	EEU	Renovated - standard	Housing stock	Million units	0	1.84095	3.77156	4.73904	5.27194	5.6724	5.99254	6.21613
SSP2	EEU	Renovated - advanced	Housing stock	Million units	0	0.50511	0.85807	0.95953	1.00995	1.04481	1.0659	1.07377
SSP2	FSU	Existing <1945	Housing stock	Million units	19.6554	15.564	13.5286	11.9308	10.6926	9.62374	8.68562	7.86925
SSP2	FSU	Existing 1946-1990	Housing stock	Million units	39.1791	32.0468	26.4879	21.2956	16.7171	12.758	9.53616	7.03295
SSP2	FSU	Existing 1991-2015	Housing stock	Million units	38.1139	35.1205	33.1069	30.7119	27.8974	24.6542	21.1416	17.5729
SSP2	FSU	New - standard	Housing stock	Million units	0	8.66532	15.3014	20.9216	26.34	31.4936	36.129	40.0857
SSP2	FSU	New - advanced	Housing stock	Million units	0	0.02462	0.16338	0.96803	1.80986	2.6737	3.59176	4.53279
SSP2	FSU	Renovated - standard	Housing stock	Million units	0	3.59117	4.95527	6.20517	7.40764	8.66816	9.87202	10.8477
SSP2	FSU	Renovated - advanced	Housing stock	Million units	0	1.25625	1.85351	2.28442	2.5461	2.7412	2.87623	2.95542
SSP2	LAC	Slum	Housing stock	Million units	18.8496	19.8226	20.1077	19.7723	18.9017	17.5477	15.8047	13.7865
SSP2	LAC	Existing <1945	Housing stock	Million units	9.05292	6.99179	5.88571	4.93224	4.13563	3.45779	2.88625	2.43089
SSP2	LAC	Existing 1946-1990	Housing stock	Million units	52.4714	44.6447	39.5734	34.714	30.0477	25.6092	21.3926	17.5813
SSP2	LAC	Existing 1991-2015	Housing stock	Million units	80.0717	73.6558	69.7444	65.5752	60.976	55.9676	50.526	44.7704
SSP2	LAC	New - standard	Housing stock	Million units	0	13.4144	26.3337	39.1345	51.9353	64.3977	76.2046	87.0635
SSP2	LAC	New - advanced	Housing stock	Million units	0	0	0.00011	0.02754	0.07483	0.15018	0.25099	0.37642
SSP2	LAC	Renovated - standard	Housing stock	Million units	0	6.63981	8.09535	9.14391	10.0655	10.9738	12.0763	13.3075
SSP2	LAC	Renovated - advanced	Housing stock	Million units	0	0	0	0	0	0	0	0
SSP2	MEA	Slum	Housing stock	Million units	10.9031	12.6455	13.7307	14.352	14.531	14.2831	13.5853	12.5275
SSP2	MEA	Existing <1945	Housing stock	Million units	6.49347	5.22911	4.53181	3.89045	3.25357	2.6954	2.31806	2.07006
SSP2	MEA	Existing 1946-1990	Housing stock	Million units	29.3058	24.2333	21.0013	17.8032	14.4116	11.2102	8.67676	6.81862
SSP2	MEA	Existing 1991-2015	Housing stock	Million units	47.2177	42.9871	40.4375	37.7048	34.27	30.0384	25.704	21.6368
SSP2	MEA	New - standard	Housing stock	Million units	0	9.99369	19.7535	29.2961	38.9431	48.5141	57.6801	66.1489
SSP2	MEA	New - advanced	Housing stock	Million units	0	0	0.00022	0.04041	0.11081	0.22671	0.4043	0.65104
SSP2	MEA	Renovated - standard	Housing stock	Million units	0	4.98062	6.62233	8.17156	10.433	13.2454	15.4839	17.039
SSP2	MEA	Renovated - advanced	Housing stock	Million units	0	0	0	0	0	0	0	0
SSP2	NAM	Existing <1945	Housing stock	Million units	35.5094	32.0106	28.2946	23.6709	19.1169	14.9306	12.4393	11.1847
SSP2	NAM	Existing 1946-1990	Housing stock	Million units	50.123	46.4352	42.0466	35.7353	28.8902	21.6863	16.8267	13.9225
SSP2	NAM	Existing 1991-2015	Housing stock	Million units	60.043	56.484	52.907	47.1957	40.7497	33.3178	28.9806	26.3262
SSP2	NAM	New - standard	Housing stock	Million units	0	7.93636	14.0532	19.2794	24.7616	30.491	36.4516	42.6626
SSP2	NAM	New - advanced	Housing stock	Million units	0	1.91032	6.16463	11.7897	17.6871	23.8725	30.2511	36.8368
SSP2	NAM	Renovated - standard	Housing stock	Million units	0	6.40746	12.9164	23.0598	33.7371	45.0479	50.1055	51.8402
SSP2	NAM	Renovated - advanced	Housing stock	Million units	0	0.87631	1.96977	3.70163	5.35484	6.81334	7.22383	7.27446
SSP2	PAO	Existing <1945	Housing stock	Million units	12.2918	10.1303	8.9481	7.88138	6.89269	5.9684	5.13593	4.39042
SSP2	PAO	Existing 1946-1990	Housing stock	Million units	24.0013	21.8741	20.367	18.8755	17.3537	15.7931	14.2446	12.7269
SSP2	PAO	Existing 1991-2015	Housing stock	Million units	29.0228	27.3075	26.3024	25.2661	24.1329	22.871	21.4936	20.0064
SSP2	PAO	New - standard	Housing stock	Million units	0	4.80499	8.41917	11.7253	14.8547	17.8482	20.7122	23.4333
SSP2	PAO	New - advanced	Housing stock	Million units	0	0.00059	0.00475	0.08769	0.17049	0.25326	0.33379	0.41155
SSP2	PAO	Renovated - standard	Housing stock	Million units	0	1.74803	2.05045	2.29317	2.63513	3.13782	3.71886	4.36596
SSP2	PAO	Renovated - advanced	Housing stock	Million units	0	0.03484	0.03992	0.04591	0.05534	0.06833	0.081	0.09273
SSP2	PAS	Slum	Housing stock	Million units	1.65261	1.25846	0.9462	0.71594	0.5578	0.45838	0.46378	0.47828
SSP2	PAS	Existing <1945	Housing stock	Million units	9.16081	8.61918	8.21477	7.89382	7.63302	7.41357	7.21932	7.03977
SSP2	PAS	Existing 1946-1990	Housing stock	Million units	35.6362	28.8835	22.9718	17.8541	13.5477	10.023	7.24754	5.0976
SSP2	PAS	Existing 1991-2015	Housing stock	Million units	87.13	80.8349	73.1979	64.6548	55.723	46.853	38.4126	30.6878
SSP2	PAS	New - standard	Housing stock	Million units	0	14.6741	30.5569	44.6574	58.2653	70.883	82.1214	91.6811
SSP2	PAS	New - advanced	Housing stock	Million units	0	0.00572	0.15983	1.90139	3.62375	5.22788	6.63993	7.82794
SSP2	PAS	Renovated - standard	Housing stock	Million units	0	0.81114	1.19375	1.4129	1.52901	1.59567	1.65585	1.72117
SSP2	PAS	Renovated - advanced	Housing stock	Million units	0	0	0	0	0	0	0	0
SSP2	SAS	Slum	Housing stock	Million units	3.84085	5.18262	6.30177	7.2923	8.09664	8.65178	8.92155	8.90269
SSP2	SAS	Existing <1945	Housing stock	Million units	34.8256	31.9937	29.7222	27.7095	25.9043	24.2902	22.4851	20.3746
SSP2	SAS	Existing 1946-1990	Housing stock	Million units	120.13	108.957	98.5739	88.3483	78.313	68.6493	58.8239	48.8967
SSP2	SAS	Existing 1991-2015	Housing stock	Million units	175.267	168.757	161.969	154.029	144.855	134.72	122.593	107.638
SSP2	SAS	New - standard	Housing stock	Million units	0	23.4679	48.6411	73.1222	98.6598	124.808	151.378	177.486
SSP2	SAS	New - advanced	Housing stock	Million units	0	0.0832	0.34491	0.89483	1.48882	2.11605	2.75935	3.40811
SSP2	SAS	Renovated - standard	Housing stock	Million units	0	0.49387	0.76925	0.98222	1.14425	1.27187	3.41266	9.21995
SSP2	SAS	Renovated - advanced	Housing stock	Million units	0	0	0	0	0	0	0	0
SSP2	WEU	Existing <1945	Housing stock	Million units	63.4112	53.36	44.5097	33.3663	27.3884	23.4674	20.4873	18.2709
SSP2	WEU	Existing 1946-1990	Housing stock	Million units	56.2913	47.5924	39.2895	29.7094	22.2563	16.3247	12.4965	9.58872
SSP2	WEU	Existing 1991-2015	Housing stock	Million units	82.0221	78.3028	74.9893	69.7461	65.5867	60.6409	54.4131	46.9275
SSP2	WEU	New - standard	Housing stock	Million units	0	1.12013	2.10183	3.13351	4.17263	5.21914	6.23746	7.21335
SSP2	WEU	New - advanced	Housing stock	Million units	0	15.915	29.5135	43.2097	57.2582	71.6708	86.237	100.736
SSP2	WEU	Renovated - standard	Housing stock	Million units	0	8.35034	17.0129	30.6668	36.7165	40.4177	43.3985	46.4756
SSP2	WEU	Renovated - advanced	Housing stock	Million units	0	1.72569	3.2387	5.12231	5.77365	6.0657	6.25995	6.45914
SSP3	AFR	Slum	Housing stock	Million units	14.1933	18.0178	21.4215	24.8076	28.1011	31.1448	33.7936	35.9372
SSP3	AFR	Existing <1945	Housing stock	Million units	14.2492	13.2051	12.353	11.5937	10.919	10.3194	9.78077	9.29678
SSP3	AFR	Existing 1946-1990	Housing stock	Million units	50.3176	45.5422	41.1504	36.8002	32.5558	28.4786	24.6032	20.9823
SSP3	AFR	Existing 1991-2015	Housing stock	Million units	90.1397	87.0071	83.5448	79.4333	74.7365	69.5532	63.992	58.1844
SSP3	AFR	New - standard	Housing stock	Million units	0	15.5677	34.1319	52.3447	70.7237	88.8939	106.576	123.592
SSP3	AFR	New - advanced	Housing stock	Million units	0	0	0	0	0	0	0	0
SSP3	AFR	Renovated - standard	Housing stock	Million units	0	0.95633	1.20538	1.34423	1.48306	1.65711	1.86053	2.08333
SSP3	AFR	Renovated - advanced	Housing stock	Million units	0	0	0	0	0	0	0	0
SSP3	CPA	Slum	Housing stock	Million units	51.8132	50.132	46.0828	42.1176	38.5845	35.5807	33.0628	30.8693
SSP3	CPA	Existing <1945	Housing stock	Million units	42.5601	36.4835	30.3424	24.585	22.4561	20.9013	18.4132	17.1342
SSP3	CPA	Existing 1946-1990	Housing stock	Million units	75.6841	47.9671	26.8542	12.9373	4.04292	1.38234	0.7124	0.36014
SSP3	CPA	Existing 1991-2015	Housing stock	Million units	259.868	220.243	174.736	130.347	92.5193	59.1159	30.6517	15.4516
SSP3	CPA	New - standard	Housing stock	Million units	0	55.852	110.839	160.702	203.092	235.953	258.677	271.751
SSP3	CPA	New - advanced	Housing stock	Million units	0	0.00049	0.02436	0.19507	0.38879	0.57725	0.73524	0.8499
SSP3	CPA	Renovated - standard	Housing stock	Million units	0	21.6441	43.4529	58.5232	62.4497	64.3724	67.98	69.349
SSP3	CPA	Renovated - advanced	Housing stock	Million units	0	0	0	0	0	0	0	0
SSP3	EEU	Existing <1945	Housing stock	Million units	18.7304	16.3004	14.9099	13.745	12.6489	11.5955	10.6143	9.69505
SSP3	EEU	Existing 1946-1990	Housing stock	Million units	14.0751	11.5538	9.63084	7.93877	6.29635	4.7391	3.3908	2.26138
SSP3	EEU	Existing 1991-2015	Housing stock	Million units	14.1156	12.7081	11.8301	11.0439	10.0888	8.95974	7.74884	6.49334
SSP3	EEU	New - standard	Housing stock	Million units	0	0.2271	0.44426	0.68129	0.89486	1.08635	1.26301	1.42044
SSP3	EEU	New - advanced	Housing stock	Million units	0	3.62092	6.69488	9.63604	12.4597	15.1623	17.6987	20.0047
SSP3	EEU	Renovated - standard	Housing stock	Million units	0	2.34054	2.9894	3.075	3.25729	3.58648	3.85941	4.08381
SSP3	EEU	Renovated - advanced	Housing stock	Million units	0	0.00553	0.00599	0.00584	0.00578	0.00593	0.00607	0.0062
SSP3	FSU	Existing <1945	Housing stock	Million units	19.6554	16.363	14.761	13.4887	12.448	11.5702	10.8242	10.182
SSP3	FSU	Existing 1946-1990	Housing stock	Million units	39.1791	32.9989	28.0216	23.2735	18.8297	14.7963	11.3227	8.39633
SSP3	FSU	Existing 1991-2015	Housing stock	Million units	38.1139	35.291	33.5547	31.4933	29.0471	26.1832	22.9901	19.5956
SSP3	FSU	New - standard	Housing stock	Million units	0	8.6785	15.4068	21.5975	27.6077	33.3653	38.6278	43.2071
SSP3	FSU	New - advanced	Housing stock	Million units	0	0.01147	0.05799	0.29214	0.54211	0.80206	1.09301	1.41139
SSP3	FSU	Renovated - standard	Housing stock	Million units	0	2.98842	3.63923	4.18593	4.79956	5.50664	6.22611	6.89501
SSP3	FSU	Renovated - advanced	Housing stock	Million units	0	0.01153	0.01656	0.0209	0.02516	0.02885	0.03206	0.03444
SSP3	LAC	Slum	Housing stock	Million units	18.8496	20.1063	20.9905	21.5506	21.8174	21.7966	21.5007	20.9672
SSP3	LAC	Existing <1945	Housing stock	Million units	9.05292	7.2196	6.11129	5.16304	4.35598	3.67618	3.10106	2.61043
SSP3	LAC	Existing 1946-1990	Housing stock	Million units	52.4714	45.3012	40.2333	35.435	30.8138	26.3877	22.2281	18.3709
SSP3	LAC	Existing 1991-2015	Housing stock	Million units	80.0717	74.4227	70.5498	66.4651	61.9561	57.0267	51.7553	46.2568
SSP3	LAC	New - standard	Housing stock	Million units	0	13.0503	25.1865	36.7251	47.8997	58.4858	68.2691	77.0733
SSP3	LAC	New - advanced	Housing stock	Million units	0	0	0	0.00092	0.0021	0.00358	0.00595	0.00969
SSP3	LAC	Renovated - standard	Housing stock	Million units	0	4.71611	6.04277	6.92659	7.71042	8.50129	9.34281	10.2029
SSP3	LAC	Renovated - advanced	Housing stock	Million units	0	0	0	0	0	0	0	0
SSP3	MEA	Slum	Housing stock	Million units	10.9031	12.7567	14.1304	15.2236	16.0619	16.5921	16.8041	16.7069
SSP3	MEA	Existing <1945	Housing stock	Million units	6.49347	5.2805	4.65262	4.08243	3.52479	3.00767	2.58901	2.27003
SSP3	MEA	Existing 1946-1990	Housing stock	Million units	29.3058	24.3811	21.3674	18.436	15.4013	12.3696	9.73177	7.57186
SSP3	MEA	Existing 1991-2015	Housing stock	Million units	47.2177	43.0875	40.652	38.143	35.2146	31.6968	27.7781	23.7412
SSP3	MEA	New - standard	Housing stock	Million units	0	10.0249	19.6726	28.7833	37.685	46.3216	54.4245	61.7736
SSP3	MEA	New - advanced	Housing stock	Million units	0	0	0	0.00055	0.00151	0.00309	0.00558	0.00929
SSP3	MEA	Renovated - standard	Housing stock	Million units	0	4.62387	5.6706	6.56976	7.87758	9.63422	11.4064	12.9381
SSP3	MEA	Renovated - advanced	Housing stock	Million units	0	0	0	0	0	0	0	0
SSP3	NAM	Existing <1945	Housing stock	Million units	35.5094	32.4912	29.3425	26.0731	22.7151	19.3464	16.4011	13.799
SSP3	NAM	Existing 1946-1990	Housing stock	Million units	50.123	46.7271	42.8243	38.341	33.2959	27.7798	22.4707	17.4256
SSP3	NAM	Existing 1991-2015	Housing stock	Million units	60.043	55.7116	51.0813	46.1461	40.8124	35.376	31.3322	28.0943
SSP3	NAM	New - standard	Housing stock	Million units	0	7.48175	13.8492	19.837	26.0992	32.6273	39.361	46.3234
SSP3	NAM	New - advanced	Housing stock	Million units	0	2.36493	6.36867	11.2322	16.3496	21.7362	27.3417	33.176
SSP3	NAM	Renovated - standard	Housing stock	Million units	0	7.26209	14.8407	22.7359	30.936	38.9627	44.3005	47.6445
SSP3	NAM	Renovated - advanced	Housing stock	Million units	0	0.02169	0.04547	0.06712	0.08733	0.10222	0.10823	0.11127
SSP3	PAO	Existing <1945	Housing stock	Million units	12.2918	10.4169	9.20308	8.15844	7.23761	6.42709	5.7165	5.09028
SSP3	PAO	Existing 1946-1990	Housing stock	Million units	24.0013	22.0582	20.5576	19.1206	17.7113	16.3253	14.9644	13.6294
SSP3	PAO	Existing 1991-2015	Housing stock	Million units	29.0228	27.3643	26.3569	25.3506	24.2793	23.1275	21.8999	20.597
SSP3	PAO	New - standard	Housing stock	Million units	0	4.80538	8.42277	11.8018	15.0035	18.0687	21.0023	23.7905
SSP3	PAO	New - advanced	Housing stock	Million units	0	0.00021	0.00118	0.0112	0.0217	0.03275	0.04371	0.05445
SSP3	PAO	Renovated - standard	Housing stock	Million units	0	1.243	1.57857	1.72137	1.83104	1.94852	2.08331	2.25578
SSP3	PAO	Renovated - advanced	Housing stock	Million units	0	0.00015	0.00019	0.0002	0.00021	0.00022	0.00022	0.00024
SSP3	PAS	Slum	Housing stock	Million units	1.65261	1.26142	0.95546	0.73535	0.59149	0.51039	0.53451	0.57121
SSP3	PAS	Existing <1945	Housing stock	Million units	9.16081	8.6404	8.23775	7.91793	7.65763	7.43914	7.24935	7.07885
SSP3	PAS	Existing 1946-1990	Housing stock	Million units	35.6362	28.9587	23.0465	17.931	13.628	10.1074	7.32913	5.18411
SSP3	PAS	Existing 1991-2015	Housing stock	Million units	87.13	81.051	73.4855	64.9689	56.0357	47.1604	38.7311	31.0339
SSP3	PAS	New - standard	Housing stock	Million units	0	14.3641	29.7982	44.7404	58.8892	71.6941	82.7628	91.8512
SSP3	PAS	New - advanced	Housing stock	Million units	0	0	0	0	0	0	0	0
SSP3	PAS	Renovated - standard	Housing stock	Million units	0	0.49866	0.80848	0.99787	1.11143	1.17815	1.21687	1.23933
SSP3	PAS	Renovated - advanced	Housing stock	Million units	0	0	0	0	0	0	0	0
SSP3	SAS	Slum	Housing stock	Million units	3.84085	5.2438	6.50517	7.73777	8.89654	9.9203	10.7625	11.3966
SSP3	SAS	Existing <1945	Housing stock	Million units	34.8256	31.9986	29.6932	27.6585	25.8544	24.246	22.783	21.4367
SSP3	SAS	Existing 1946-1990	Housing stock	Million units	120.13	108.791	97.9984	87.4588	77.3709	67.7218	58.5277	50.0311
SSP3	SAS	Existing 1991-2015	Housing stock	Million units	175.267	168.407	160.73	152.014	142.66	132.548	121.576	110.041
SSP3	SAS	New - standard	Housing stock	Million units	0	23.4261	48.5306	71.9474	94.4421	116.214	137.506	157.7
SSP3	SAS	New - advanced	Housing stock	Million units	0	0	0	0	0	0	0	0
SSP3	SAS	Renovated - standard	Housing stock	Million units	0	0.28478	0.47508	0.61579	0.72249	0.80711	0.87676	0.93536
SSP3	SAS	Renovated - advanced	Housing stock	Million units	0	0	0	0	0	0	0	0
SSP3	WEU	Existing <1945	Housing stock	Million units	63.4112	53.5283	45.0654	39.8792	35.3665	31.2222	27.1637	23.2746
SSP3	WEU	Existing 1946-1990	Housing stock	Million units	56.2913	47.7008	39.6724	33.3747	27.3449	21.4382	15.8153	11.554
SSP3	WEU	Existing 1991-2015	Housing stock	Million units	82.0221	78.0256	74.0409	70.2319	66.7354	62.6799	57.6419	51.5661
SSP3	WEU	New - standard	Housing stock	Million units	0	1.07731	2.03797	3.07218	4.12275	5.18937	6.205	7.15977
SSP3	WEU	New - advanced	Housing stock	Million units	0	15.9579	29.5774	43.2711	57.3082	71.7006	86.2695	100.789
SSP3	WEU	Renovated - standard	Housing stock	Million units	0	10.0413	20.1975	24.7736	27.5429	29.9822	33.0572	36.1128
SSP3	WEU	Renovated - advanced	Housing stock	Million units	0	0.03476	0.0635	0.07052	0.07427	0.07705	0.08142	0.0865

## Sheet: stock_by_fuel
Scenario	Region	Fuel_Heating	Variable	Unit	2015	2020	2025	2030	2035	2040	2045	2050
SSP1	AFR	Biomass	Housing stock	Million units	29.1529	27.4746	25.6852	23.746	21.7935	19.8124	17.7355	15.5569
SSP1	AFR	Coal	Housing stock	Million units	16.1868	15.3173	14.3954	13.3939	12.3299	11.2214	10.0951	8.96804
SSP1	AFR	District heating	Housing stock	Million units	0	0	0	0	0	0	0	0
SSP1	AFR	Electricity	Housing stock	Million units	24.0401	27.4871	31.1283	34.2341	36.9782	39.2974	40.9304	41.9111
SSP1	AFR	Gas	Housing stock	Million units	0.00649	6.73602	13.8718	21.2243	28.6249	35.9237	43.2857	50.6715
SSP1	AFR	Oil	Housing stock	Million units	13.3721	12.6469	11.8681	11.0074	10.0978	9.15616	8.16763	7.14299
SSP1	AFR	No heating	Housing stock	Million units	86.1415	91.6072	99.6333	108.288	118.101	128.88	140.315	152.076
SSP1	CPA	Biomass	Housing stock	Million units	47.5272	36.4462	24.0917	17.386	11.385	6.31051	2.87669	1.36153
SSP1	CPA	Coal	Housing stock	Million units	145.272	122.841	99.6808	74.2078	52.4672	35.3965	22.2318	15.6165
SSP1	CPA	District heating	Housing stock	Million units	49.7469	63.9432	74.216	80.5728	84.1883	86.1278	87.3901	88.7791
SSP1	CPA	Electricity	Housing stock	Million units	160.736	123.984	70.2858	54.3694	47.1816	43.6154	43.6336	44.94
SSP1	CPA	Gas	Housing stock	Million units	0	58.4126	138.505	177.13	204.488	223.809	235.855	240.943
SSP1	CPA	Oil	Housing stock	Million units	0	0.00789	0.04286	0.05661	0.06599	0.07065	0.07322	0.07365
SSP1	CPA	No heating	Housing stock	Million units	26.6429	26.9199	27.2885	27.5345	27.7663	27.9792	28.1314	28.1734
SSP1	EEU	Biomass	Housing stock	Million units	8.31567	7.19554	6.34623	5.49395	4.69005	3.94093	3.2493	2.60442
SSP1	EEU	Coal	Housing stock	Million units	11.0701	9.76935	8.63905	7.74373	6.82238	5.89981	4.98476	4.10548
SSP1	EEU	District heating	Housing stock	Million units	9.09136	9.69674	10.0595	10.2478	10.3381	10.3575	10.316	10.2288
SSP1	EEU	Electricity	Housing stock	Million units	4.00564	5.36486	7.10212	8.71202	10.1694	11.5027	12.8196	14.1709
SSP1	EEU	Gas	Housing stock	Million units	12.6318	13.1454	13.0934	12.7975	12.6491	12.5904	12.5034	12.3525
SSP1	EEU	Oil	Housing stock	Million units	1.59777	1.36168	1.0407	0.89658	0.73925	0.59614	0.48171	0.39297
SSP1	EEU	No heating	Housing stock	Million units	0.20878	0.2224	0.23363	0.2441	0.25369	0.2622	0.26909	0.27419
SSP1	FSU	Biomass	Housing stock	Million units	6.4943	5.34246	4.5607	3.66071	2.81054	2.01364	1.40652	0.92293
SSP1	FSU	Coal	Housing stock	Million units	3.0298	2.60544	2.28019	1.90204	1.54021	1.19732	0.93207	0.70853
SSP1	FSU	District heating	Housing stock	Million units	56.0336	59.495	61.0248	62.004	62.6942	63.0953	63.1056	62.6814
SSP1	FSU	Electricity	Housing stock	Million units	3.2402	2.96262	4.2757	5.967	7.74101	9.40595	10.6281	11.5948
SSP1	FSU	Gas	Housing stock	Million units	22.6407	21.3327	19.9257	18.2019	16.86	15.8859	15.2896	14.9087
SSP1	FSU	Oil	Housing stock	Million units	5.50165	4.401	3.37867	2.61848	1.81741	1.13159	0.75819	0.55146
SSP1	FSU	No heating	Housing stock	Million units	0.00818	0.00931	0.01024	0.01106	0.0118	0.01239	0.01289	0.01325
SSP1	LAC	Biomass	Housing stock	Million units	2.68539	1.05674	0.95627	0.86389	0.7756	0.69101	0.61054	0.53359
SSP1	LAC	Coal	Housing stock	Million units	0.45091	0.42306	0.39362	0.36113	0.32569	0.28813	0.24833	0.20785
SSP1	LAC	District heating	Housing stock	Million units	0	0	0	0	0	0	0	0
SSP1	LAC	Electricity	Housing stock	Million units	35.8341	32.3067	31.9499	31.7	30.9886	29.8744	28.5027	27.0786
SSP1	LAC	Gas	Housing stock	Million units	14.6392	27.7784	35.802	43.4594	51.2094	58.8103	65.8119	71.8697
SSP1	LAC	Oil	Housing stock	Million units	54.8797	51.3628	47.3953	42.7444	37.7596	32.5611	27.594	22.9828
SSP1	LAC	No heating	Housing stock	Million units	51.9563	52.7002	54.169	55.5933	57.0005	58.2819	59.3498	60.11
SSP1	MEA	Biomass	Housing stock	Million units	0.42915	0.36344	0.26521	0.19978	0.173	0.14882	0.12576	0.10425
SSP1	MEA	Coal	Housing stock	Million units	0.05804	0.0538	0.04964	0.04453	0.03858	0.03218	0.02525	0.01992
SSP1	MEA	District heating	Housing stock	Million units	0	0	0	0	0	0	0	0
SSP1	MEA	Electricity	Housing stock	Million units	21.6936	18.9653	18.4283	18.785	18.8969	18.8799	18.7314	18.4687
SSP1	MEA	Gas	Housing stock	Million units	22.153	31.5065	38.792	45.5504	52.4619	58.9779	64.8331	69.7743
SSP1	MEA	Oil	Housing stock	Million units	31.618	29.2275	26.4465	22.5435	18.4582	14.6784	11.5554	9.16907
SSP1	MEA	No heating	Housing stock	Million units	17.9682	19.9648	22.2707	24.508	26.6925	28.7371	30.5572	32.1042
SSP1	NAM	Biomass	Housing stock	Million units	8.58963	8.06829	7.40372	6.58083	5.72966	4.7239	3.63247	2.51072
SSP1	NAM	Coal	Housing stock	Million units	0	0	0	0	0	0	0	0
SSP1	NAM	District heating	Housing stock	Million units	0	0	0	0	0	0	0	0
SSP1	NAM	Electricity	Housing stock	Million units	20.3877	26.1902	33.3514	42.29	54.063	63.9502	72.2271	80.8762
SSP1	NAM	Gas	Housing stock	Million units	90.5766	92.5746	94.1374	94.8822	93.0989	92.7429	94.0946	95.3275
SSP1	NAM	Oil	Housing stock	Million units	21.6811	20.6414	18.7314	15.8301	12.5576	10.1371	8.99035	8.21981
SSP1	NAM	No heating	Housing stock	Million units	4.4404	4.58582	4.72831	4.86379	4.99077	5.10771	5.21162	5.30519
SSP1	PAO	Biomass	Housing stock	Million units	2.54388	2.16936	1.92766	1.7103	1.51525	1.33796	1.17195	1.01024
SSP1	PAO	Coal	Housing stock	Million units	1.97624	1.85181	1.74838	1.64512	1.54244	1.44004	1.3369	1.23151
SSP1	PAO	District heating	Housing stock	Million units	3.09909	3.30797	3.42692	3.521	3.59542	3.65406	3.69799	3.72675
SSP1	PAO	Electricity	Housing stock	Million units	8.56624	9.17926	10.4078	11.6854	13.1027	14.7113	16.4092	18.1773
SSP1	PAO	Gas	Housing stock	Million units	23.8465	25.7052	26.2616	26.5853	26.6515	26.4738	26.2192	25.9354
SSP1	PAO	Oil	Housing stock	Million units	25.284	23.6878	22.3562	21.0198	19.6748	18.3052	16.8624	15.3187
SSP1	PAO	No heating	Housing stock	Million units	0	0.00371	0.00756	0.01214	0.01675	0.02145	0.0262	0.03091
SSP1	PAS	Biomass	Housing stock	Million units	18.5045	16.79	14.7991	12.714	10.6446	8.67327	6.89499	5.31001
SSP1	PAS	Coal	Housing stock	Million units	0	0	0	0	0	0	0	0
SSP1	PAS	District heating	Housing stock	Million units	0	0	0	0	0	0	0	0
SSP1	PAS	Electricity	Housing stock	Million units	4.08741	5.98784	8.12002	10.2423	12.2337	13.9968	15.5368	16.7492
SSP1	PAS	Gas	Housing stock	Million units	0	0	0	0	0	0	0	0
SSP1	PAS	Oil	Housing stock	Million units	0	0	0	0	0	0	0	0
SSP1	PAS	No heating	Housing stock	Million units	110.988	112.829	115.665	118.557	121.685	124.795	127.601	129.803
SSP1	SAS	Biomass	Housing stock	Million units	29.8353	28.1867	26.4533	24.4962	22.3432	20.1395	17.8912	15.5571
SSP1	SAS	Coal	Housing stock	Million units	0	0	0	0	0	0	0	0
SSP1	SAS	District heating	Housing stock	Million units	0	0	0	0	0	0	0	0
SSP1	SAS	Electricity	Housing stock	Million units	7.76654	10.9984	14.5169	17.9187	21.2919	24.4677	27.4231	30.1865
SSP1	SAS	Gas	Housing stock	Million units	0	0	0	0	0	0	0	0
SSP1	SAS	Oil	Housing stock	Million units	0	0	0	0	0	0	0	0
SSP1	SAS	No heating	Housing stock	Million units	296.461	301.356	309.166	316.538	324.609	333.163	341.839	349.895
SSP1	WEU	Biomass	Housing stock	Million units	19.18	15.2378	12.3284	10.2769	8.11938	6.45085	5.16213	3.91903
SSP1	WEU	Coal	Housing stock	Million units	9.1357	8.42893	7.6812	7.07431	6.20185	5.27744	4.59679	3.91037
SSP1	WEU	District heating	Housing stock	Million units	11.3175	12.1275	12.6721	13.0509	13.0543	12.8004	12.7967	12.9541
SSP1	WEU	Electricity	Housing stock	Million units	27.5142	42.7324	60.1528	71.9558	83.5006	95.0286	107.169	119.29
SSP1	WEU	Gas	Housing stock	Million units	95.4334	92.4623	87.5294	86.2149	85.3743	84.8844	83.8332	82.582
SSP1	WEU	Oil	Housing stock	Million units	39.095	35.3196	30.2288	26.4404	22.932	19.969	17.145	14.3869
SSP1	WEU	No heating	Housing stock	Million units	0.04887	0.05661	0.06171	0.06699	0.07263	0.07872	0.08487	0.09196
SSP2	AFR	Biomass	Housing stock	Million units	29.1529	27.5614	25.8369	23.8886	21.7395	19.3534	17.0719	14.9018
SSP2	AFR	Coal	Housing stock	Million units	16.1868	15.3124	14.3878	13.3907	12.3486	11.2592	10.119	8.94538
SSP2	AFR	District heating	Housing stock	Million units	0	0	0	0	0	0	0	0
SSP2	AFR	Electricity	Housing stock	Million units	24.0401	27.7187	31.9457	35.9614	39.2983	41.7953	43.5152	44.5285
SSP2	AFR	Gas	Housing stock	Million units	0.00649	5.28091	10.3199	15.0525	20.3633	26.3974	32.2749	37.8721
SSP2	AFR	Oil	Housing stock	Million units	13.3721	13.7813	14.4544	15.3103	16.0804	16.6313	17.2683	17.982
SSP2	AFR	No heating	Housing stock	Million units	86.1415	90.8843	97.775	104.856	112.667	121.093	129.961	139.135
SSP2	CPA	Biomass	Housing stock	Million units	47.5272	37.5752	27.5059	17.011	11.546	7.60015	4.24976	1.91663
SSP2	CPA	Coal	Housing stock	Million units	145.272	122.982	101.027	78.0244	55.3258	38.0748	23.9639	16.1334
SSP2	CPA	District heating	Housing stock	Million units	49.7469	61.0311	69.015	74.9254	78.2994	80.3888	81.4413	83.8908
SSP2	CPA	Electricity	Housing stock	Million units	160.736	129.935	97.9776	70.1966	56.5664	47.594	40.7198	35.3163
SSP2	CPA	Gas	Housing stock	Million units	0	44.8285	87.6524	125.802	146.332	159.526	168.716	174.409
SSP2	CPA	Oil	Housing stock	Million units	0	9.28311	22.4005	37.0591	49.8886	60.058	66.8292	70.3841
SSP2	CPA	No heating	Housing stock	Million units	26.6429	26.7429	26.9096	26.9405	26.9547	26.9599	26.9295	26.8271
SSP2	EEU	Biomass	Housing stock	Million units	8.31567	7.2187	6.39011	5.55763	4.7785	4.0585	3.39636	2.81556
SSP2	EEU	Coal	Housing stock	Million units	11.0701	9.95203	9.06756	8.17714	7.24898	6.30006	5.36602	4.47837
SSP2	EEU	District heating	Housing stock	Million units	9.09136	9.69674	10.0557	10.2962	10.4381	10.5058	10.5072	10.4435
SSP2	EEU	Electricity	Housing stock	Million units	4.00564	4.99408	6.15576	7.73189	9.25197	10.6933	12.0986	13.3846
SSP2	EEU	Gas	Housing stock	Million units	12.6318	13.3067	13.4141	13.0686	12.7997	12.6434	12.4374	12.2346
SSP2	EEU	Oil	Housing stock	Million units	1.59777	1.36534	1.18134	1.05391	0.88439	0.67875	0.52125	0.40741
SSP2	EEU	No heating	Housing stock	Million units	0.20878	0.2224	0.23361	0.24411	0.2537	0.26222	0.26913	0.27421
SSP2	FSU	Biomass	Housing stock	Million units	6.4943	5.39989	4.58788	3.60998	2.91895	2.31291	1.79183	1.34941
SSP2	FSU	Coal	Housing stock	Million units	3.0298	2.61885	2.31829	1.99894	1.67371	1.36108	1.10358	0.87695
SSP2	FSU	District heating	Housing stock	Million units	56.0336	59.495	61.0175	62.0354	62.7914	63.2896	63.4182	63.1007
SSP2	FSU	Electricity	Housing stock	Million units	3.2402	2.16562	3.0988	4.35428	5.74134	7.31224	8.94027	10.4402
SSP2	FSU	Gas	Housing stock	Million units	22.6407	22.0353	20.5465	19.136	17.8054	16.5952	15.4271	14.3994
SSP2	FSU	Oil	Housing stock	Million units	5.50165	4.54463	3.81762	3.17184	2.46808	1.72911	1.1386	0.71679
SSP2	FSU	No heating	Housing stock	Million units	0.00818	0.00931	0.01024	0.01106	0.0118	0.01241	0.01289	0.01326
SSP2	LAC	Biomass	Housing stock	Million units	2.68539	1.09107	0.98502	0.88871	0.7969	0.70917	0.62592	0.54643
SSP2	LAC	Coal	Housing stock	Million units	0.45091	0.42291	0.3938	0.36231	0.32851	0.2932	0.25728	0.22054
SSP2	LAC	District heating	Housing stock	Million units	0	0	0	0	0	0	0	0
SSP2	LAC	Electricity	Housing stock	Million units	35.8341	32.2308	32.0853	32.1078	31.8014	31.0736	29.9829	28.5972
SSP2	LAC	Gas	Housing stock	Million units	14.6392	26.3388	32.5425	38.1553	43.3145	48.0266	52.7276	57.2898
SSP2	LAC	Oil	Housing stock	Million units	54.8797	52.8156	50.4635	47.5725	44.7458	42.0072	38.8676	35.531
SSP2	LAC	No heating	Housing stock	Million units	51.9563	52.2699	53.2703	54.213	55.1496	55.9943	56.68	57.1315
SSP2	MEA	Biomass	Housing stock	Million units	0.42915	0.3753	0.31114	0.23859	0.2016	0.17507	0.15168	0.13058
SSP2	MEA	Coal	Housing stock	Million units	0.05804	0.05376	0.04982	0.04548	0.04059	0.03498	0.02908	0.02303
SSP2	MEA	District heating	Housing stock	Million units	0	0	0	0	0	0	0	0
SSP2	MEA	Electricity	Housing stock	Million units	21.6936	19.0105	19.5767	20.1678	20.3351	20.0914	19.4795	18.5996
SSP2	MEA	Gas	Housing stock	Million units	22.153	29.7687	33.7283	37.3942	42.0519	47.5777	52.494	56.678
SSP2	MEA	Oil	Housing stock	Million units	31.618	30.996	30.3816	29.327	27.2728	24.4846	22.287	20.7548
SSP2	MEA	No heating	Housing stock	Million units	17.9682	19.865	22.0299	24.0854	26.051	27.8495	29.4111	30.7058
SSP2	NAM	Biomass	Housing stock	Million units	8.58963	8.12386	7.33188	5.81669	4.83805	4.08137	3.19495	2.40298
SSP2	NAM	Coal	Housing stock	Million units	0	0	0	0	0	0	0	0
SSP2	NAM	District heating	Housing stock	Million units	0	0	0	0	0	0	0	0
SSP2	NAM	Electricity	Housing stock	Million units	20.3877	23.8331	31.5763	44.2757	57.6223	71.9379	82.8049	91.5755
SSP2	NAM	Gas	Housing stock	Million units	90.5766	94.8155	94.8967	90.7574	86.4587	82.7427	81.509	82.4895
SSP2	NAM	Oil	Housing stock	Million units	21.6811	20.702	19.819	18.7207	16.3915	12.2962	9.56661	8.28494
SSP2	NAM	No heating	Housing stock	Million units	4.4404	4.58581	4.72821	4.86182	4.98673	5.10143	5.20312	5.29448
SSP2	PAO	Biomass	Housing stock	Million units	2.54388	2.16936	1.92807	1.71107	1.51587	1.33808	1.17142	1.00918
SSP2	PAO	Coal	Housing stock	Million units	1.97624	1.85184	1.74854	1.64538	1.54264	1.44004	1.33672	1.23161
SSP2	PAO	District heating	Housing stock	Million units	3.09909	3.30796	3.42701	3.52124	3.59574	3.65437	3.6983	3.72721
SSP2	PAO	Electricity	Housing stock	Million units	8.56624	9.18015	10.4246	11.7715	13.2119	14.7832	16.3927	18.0218
SSP2	PAO	Gas	Housing stock	Million units	23.8465	25.6983	26.2346	26.4841	26.5325	26.4237	26.2656	26.0747
SSP2	PAO	Oil	Housing stock	Million units	25.284	23.6891	22.3614	21.0302	19.6806	18.2809	16.8316	15.3348
SSP2	PAO	No heating	Housing stock	Million units	0	0.00372	0.00753	0.01155	0.01559	0.01969	0.02383	0.02793
SSP2	PAS	Biomass	Housing stock	Million units	18.5045	16.7975	14.8345	12.7294	10.6509	8.68037	6.89023	5.28099
SSP2	PAS	Coal	Housing stock	Million units	0	0	0	0	0	0	0	0
SSP2	PAS	District heating	Housing stock	Million units	0	0	0	0	0	0	0	0
SSP2	PAS	Electricity	Housing stock	Million units	4.08741	5.97824	8.08277	10.2258	12.2253	13.987	15.5395	16.778
SSP2	PAS	Gas	Housing stock	Million units	0	0	0	0	0	0	0	0
SSP2	PAS	Oil	Housing stock	Million units	0	0	0	0	0	0	0	0
SSP2	PAS	No heating	Housing stock	Million units	110.988	112.311	114.324	116.135	118.003	119.787	121.331	122.475
SSP2	SAS	Biomass	Housing stock	Million units	29.8353	28.1491	26.4156	24.546	22.5967	20.6058	16.5424	9.15631
SSP2	SAS	Coal	Housing stock	Million units	0	0	0	0	0	0	0	0
SSP2	SAS	District heating	Housing stock	Million units	0	0	0	0	0	0	0	0
SSP2	SAS	Electricity	Housing stock	Million units	7.76654	11.0341	14.5527	17.8672	21.0369	23.9889	28.7304	36.8377
SSP2	SAS	Gas	Housing stock	Million units	0	0	0	0	0	0	0	0
SSP2	SAS	Oil	Housing stock	Million units	0	0	0	0	0	0	0	0
SSP2	SAS	No heating	Housing stock	Million units	296.461	299.752	305.354	309.965	314.828	319.912	325.1	329.933
SSP2	WEU	Biomass	Housing stock	Million units	19.18	15.3756	12.8753	10.0621	7.96711	6.39674	5.31927	4.39221
SSP2	WEU	Coal	Housing stock	Million units	9.1357	8.50694	7.97652	7.41225	6.615	5.64733	4.83219	4.26012
SSP2	WEU	District heating	Housing stock	Million units	11.3175	12.1276	12.6691	13.1066	13.3209	13.2297	13.086	13.312
SSP2	WEU	Electricity	Housing stock	Million units	27.5142	41.7541	53.2297	63.7279	74.3402	84.341	94.6705	105.897
SSP2	WEU	Gas	Housing stock	Million units	95.4334	93.2047	91.8452	92.0802	92.0068	92.3613	92.2633	91.037
SSP2	WEU	Oil	Housing stock	Million units	39.095	35.3419	31.9999	28.5008	24.8334	21.7559	19.2788	16.6866
SSP2	WEU	No heating	Housing stock	Million units	0.04887	0.05548	0.05979	0.06428	0.06909	0.07434	0.0797	0.08584
SSP3	AFR	Biomass	Housing stock	Million units	29.1529	27.5652	25.8918	24.0904	22.2177	20.3091	18.3803	16.4584
SSP3	AFR	Coal	Housing stock	Million units	16.1868	15.3094	14.3814	13.3811	12.3414	11.282	10.2121	9.14705
SSP3	AFR	District heating	Housing stock	Million units	0	0	0	0	0	0	0	0
SSP3	AFR	Electricity	Housing stock	Million units	24.0401	27.5721	31.617	35.6589	39.5846	43.1979	46.3402	48.9172
SSP3	AFR	Gas	Housing stock	Million units	0.00649	4.00378	7.75056	11.2112	14.6444	18.049	21.2804	24.3175
SSP3	AFR	Oil	Housing stock	Million units	13.3721	15.2013	17.3036	19.2563	21.0456	22.6255	24.111	25.4961
SSP3	AFR	No heating	Housing stock	Million units	86.1415	90.6445	96.8626	102.726	108.685	114.583	120.283	125.74
SSP3	CPA	Biomass	Housing stock	Million units	47.5272	39.9168	31.4305	21.4256	14.3315	9.30204	3.26333	1.3474
SSP3	CPA	Coal	Housing stock	Million units	145.272	123.031	101.514	79.2724	57.6343	40.804	27.5269	19.2443
SSP3	CPA	District heating	Housing stock	Million units	49.7469	60.6431	67.9757	72.9215	75.6063	77.185	77.5644	79.5669
SSP3	CPA	Electricity	Housing stock	Million units	160.736	127.889	95.0052	73.9895	64.7443	58.2112	53.3033	49.2684
SSP3	CPA	Gas	Housing stock	Million units	0	40.1915	78.7528	106.715	121.559	131.755	141.074	145.745
SSP3	CPA	Oil	Housing stock	Million units	0	13.9647	30.9012	48.4515	63.2098	74.4116	81.583	85.0338
SSP3	CPA	No heating	Housing stock	Million units	26.6429	26.687	26.7526	26.6317	26.4486	26.2137	25.9166	25.5585
SSP3	EEU	Biomass	Housing stock	Million units	8.31567	7.22299	6.41542	5.65561	4.95157	4.30214	3.69774	3.1381
SSP3	EEU	Coal	Housing stock	Million units	11.0701	10.1386	9.28452	8.41216	7.53643	6.66772	5.81105	4.9794
SSP3	EEU	District heating	Housing stock	Million units	9.09136	9.69674	10.0594	10.3364	10.5425	10.6884	10.7703	10.7836
SSP3	EEU	Electricity	Housing stock	Million units	4.00564	4.23876	5.22537	6.37971	7.62303	9.00226	10.2884	11.4537
SSP3	EEU	Gas	Housing stock	Million units	12.6318	13.8041	13.9944	13.9326	13.7165	13.3361	13.0201	12.7548
SSP3	EEU	Oil	Housing stock	Million units	1.59777	1.43275	1.29266	1.16531	1.02796	0.87664	0.72442	0.5811
SSP3	EEU	No heating	Housing stock	Million units	0.20878	0.22242	0.23361	0.24409	0.25368	0.26219	0.26909	0.27417
SSP3	FSU	Biomass	Housing stock	Million units	6.4943	5.41768	4.76987	4.17725	3.62703	3.08207	2.60796	2.14534
SSP3	FSU	Coal	Housing stock	Million units	3.0298	2.62282	2.34632	2.08335	1.83139	1.58089	1.35387	1.13202
SSP3	FSU	District heating	Housing stock	Million units	56.0336	59.495	61.0406	62.1047	62.928	63.5147	63.7578	63.5842
SSP3	FSU	Electricity	Housing stock	Million units	3.2402	2.31446	2.81898	3.39483	4.1458	5.08091	6.04365	6.98191
SSP3	FSU	Gas	Housing stock	Million units	22.6407	21.7539	20.2995	18.9663	17.7092	16.5017	15.4364	14.4848
SSP3	FSU	Oil	Housing stock	Million units	5.50165	4.72965	4.17235	3.61442	3.04616	2.4798	1.90348	1.38043
SSP3	FSU	No heating	Housing stock	Million units	0.00818	0.00931	0.01023	0.01106	0.01179	0.01242	0.01289	0.01325
SSP3	LAC	Biomass	Housing stock	Million units	2.68539	2.2326	1.96911	1.73147	1.50508	1.28796	1.06977	0.85151
SSP3	LAC	Coal	Housing stock	Million units	0.45091	0.42284	0.39442	0.364	0.33185	0.29834	0.26388	0.22852
SSP3	LAC	District heating	Housing stock	Million units	0	0	0	0	0	0	0	0
SSP3	LAC	Electricity	Housing stock	Million units	35.8341	32.5824	32.6624	33.0589	33.3501	33.4219	33.1732	32.6325
SSP3	LAC	Gas	Housing stock	Million units	14.6392	22.3831	26.4454	29.8032	32.995	36.0774	38.9219	41.4727
SSP3	LAC	Oil	Housing stock	Million units	54.8797	55.061	54.7883	53.9269	52.5869	50.7818	48.7539	46.527
SSP3	LAC	No heating	Housing stock	Million units	51.9563	52.1343	52.8545	53.3818	53.7865	54.0105	54.0204	53.7791
SSP3	MEA	Biomass	Housing stock	Million units	0.42915	0.3815	0.34903	0.31716	0.27215	0.20669	0.15454	0.12456
SSP3	MEA	Coal	Housing stock	Million units	0.05804	0.0537	0.0497	0.04554	0.04114	0.0362	0.03085	0.02546
SSP3	MEA	District heating	Housing stock	Million units	0	0	0	0	0	0	0	0
SSP3	MEA	Electricity	Housing stock	Million units	21.6936	19.0957	19.91	20.8102	21.5864	22.1227	22.3375	22.2344
SSP3	MEA	Gas	Housing stock	Million units	22.153	28.0541	30.4684	32.6926	35.4862	38.8874	42.3244	45.4632
SSP3	MEA	Oil	Housing stock	Million units	31.618	32.6634	33.3139	33.3519	32.5633	31.0085	29.2973	27.6694
SSP3	MEA	No heating	Housing stock	Million units	17.9682	19.9062	22.0546	24.0213	25.8175	27.3635	28.5948	29.4939
SSP3	NAM	Biomass	Housing stock	Million units	8.58963	8.19413	7.74785	7.23659	6.63626	5.91569	5.04881	4.06304
SSP3	NAM	Coal	Housing stock	Million units	0	0	0	0	0	0	0	0
SSP3	NAM	District heating	Housing stock	Million units	0	0	0	0	0	0	0	0
SSP3	NAM	Electricity	Housing stock	Million units	20.3877	23.1221	29.0686	38.0239	48.0046	58.6776	68.7831	78.2119
SSP3	NAM	Gas	Housing stock	Million units	90.5766	95.0646	96.4841	95.0003	93.4767	92.6359	91.0654	89.6547
SSP3	NAM	Oil	Housing stock	Million units	21.6811	21.0937	20.3234	19.3107	17.1932	13.6029	11.2189	9.35493
SSP3	NAM	No heating	Housing stock	Million units	4.4404	4.5858	4.72818	4.86085	4.98478	5.09845	5.19914	5.28949
SSP3	PAO	Biomass	Housing stock	Million units	2.54388	2.16936	1.93173	1.71775	1.52662	1.35595	1.20286	1.06456
SSP3	PAO	Coal	Housing stock	Million units	1.97624	1.85187	1.74961	1.64749	1.54615	1.44592	1.34697	1.24945
SSP3	PAO	District heating	Housing stock	Million units	3.09909	3.30796	3.42763	3.52273	3.5984	3.65888	3.70609	3.74065
SSP3	PAO	Electricity	Housing stock	Million units	8.56624	9.47139	10.5473	11.6789	12.8289	14.0029	15.1922	16.3909
SSP3	PAO	Gas	Housing stock	Million units	23.8465	25.3916	26.0739	26.5123	26.7976	26.9689	27.044	27.0238
SSP3	PAO	Oil	Housing stock	Million units	25.284	23.6921	22.3827	21.0736	19.7717	18.4784	17.1951	15.9212
SSP3	PAO	No heating	Housing stock	Million units	0	0.00372	0.00753	0.01138	0.01525	0.01918	0.02314	0.02706
SSP3	PAS	Biomass	Housing stock	Million units	18.5045	16.7956	14.88	12.8713	10.8694	8.95644	7.21921	5.67759
SSP3	PAS	Coal	Housing stock	Million units	0	0	0	0	0	0	0	0
SSP3	PAS	District heating	Housing stock	Million units	0	0	0	0	0	0	0	0
SSP3	PAS	Electricity	Housing stock	Million units	4.08741	5.98019	8.03753	10.0845	12.0077	13.7122	15.2002	16.3679
SSP3	PAS	Gas	Housing stock	Million units	0	0	0	0	0	0	0	0
SSP3	PAS	Oil	Housing stock	Million units	0	0	0	0	0	0	0	0
SSP3	PAS	No heating	Housing stock	Million units	110.988	111.998	113.414	114.336	115.036	115.421	115.404	114.913
SSP3	SAS	Biomass	Housing stock	Million units	29.8353	28.1204	26.3435	24.465	22.5383	20.5795	18.5973	16.6325
SSP3	SAS	Coal	Housing stock	Million units	0	0	0	0	0	0	0	0
SSP3	SAS	District heating	Housing stock	Million units	0	0	0	0	0	0	0	0
SSP3	SAS	Electricity	Housing stock	Million units	7.76654	11.0628	14.6249	17.9482	21.0955	24.0155	26.6789	29.0279
SSP3	SAS	Gas	Housing stock	Million units	0	0	0	0	0	0	0	0
SSP3	SAS	Oil	Housing stock	Million units	0	0	0	0	0	0	0	0
SSP3	SAS	No heating	Housing stock	Million units	296.461	298.968	302.965	305.019	306.313	306.862	306.755	305.88
SSP3	WEU	Biomass	Housing stock	Million units	19.18	16.1051	14.2219	12.3387	10.4726	8.68068	7.12246	5.68626
SSP3	WEU	Coal	Housing stock	Million units	9.1357	8.58076	8.08779	7.54187	6.92485	6.24549	5.49689	4.7088
SSP3	WEU	District heating	Housing stock	Million units	11.3175	12.1276	12.6683	13.0997	13.4403	13.6947	13.8539	13.9374
SSP3	WEU	Electricity	Housing stock	Million units	27.5142	42.1035	52.7372	59.2157	67.1808	75.7995	85.4103	95.4115
SSP3	WEU	Gas	Housing stock	Million units	95.4334	92.2473	90.9917	92.7959	93.4852	93.8384	93.3123	92.5088
SSP3	WEU	Oil	Housing stock	Million units	39.095	35.1463	31.8883	29.6171	26.9222	23.9566	20.9589	18.206
SSP3	WEU	No heating	Housing stock	Million units	0.04887	0.05549	0.05978	0.06416	0.06894	0.07413	0.0794	0.08446

## Sheet: floor_by_cohort
Scenario	Region	Cohort	Variable	Unit	2015	2020	2025	2030	2035	2040	2045	2050
SSP1	AFR	Slum	Floorspace	Million m2	605.784	916.418	1232.44	1534.62	1783.33	1944.26	1999.2	1954.13
SSP1	AFR	Existing <1945	Floorspace	Million m2	759.207	937.66	1091.39	1211.29	1302.42	1367.92	1408.73	1427.98
SSP1	AFR	Existing 1946-1990	Floorspace	Million m2	2915.43	3398.89	3739.42	3884.37	3866.48	3712.06	3443.18	3093
SSP1	AFR	Existing 1991-2015	Floorspace	Million m2	5303.58	6641.88	7789.32	8617.38	9113.32	9294.2	9173.41	8788.03
SSP1	AFR	New - standard	Floorspace	Million m2	0	1525.93	4128.02	7611.45	11977.3	17045.9	22558.7	28242.1
SSP1	AFR	New - advanced	Floorspace	Million m2	0	0	0.04466	23.6195	60.9924	116.419	197.812	309.205
SSP1	AFR	Renovated - standard	Floorspace	Million m2	0	163.042	240.503	341.275	427.805	485.098	544.397	622.317
SSP1	AFR	Renovated - advanced	Floorspace	Million m2	0	0	0	0	0	0	0	0
SSP1	CPA	Slum	Floorspace	Million m2	3750.59	2839.42	1912.48	1161.07	610.783	257.858	198.655	11.0861
SSP1	CPA	Existing <1945	Floorspace	Million m2	6236.2	5422.6	3758.15	3332.58	3097.28	2853.67	2623.83	2443.16
SSP1	CPA	Existing 1946-1990	Floorspace	Million m2	10810	6921.32	3429.63	1525.93	477.255	215.182	115.914	58.9191
SSP1	CPA	Existing 1991-2015	Floorspace	Million m2	36291.2	31144.7	23386.2	17709	12403.2	7530.05	3787.08	1864.12
SSP1	CPA	New - standard	Floorspace	Million m2	0	8852.36	17456.6	24613.7	30508.3	34889	37731.7	39147.8
SSP1	CPA	New - advanced	Floorspace	Million m2	0	0.8673	42.4882	698.725	1408.12	2107.05	2732.67	3256.51
SSP1	CPA	Renovated - standard	Floorspace	Million m2	0	3153.89	9581.02	10939.3	11580	12094.5	12496	12730.3
SSP1	CPA	Renovated - advanced	Floorspace	Million m2	0	0.4693	4.84851	6.66167	8.55039	10.2164	10.8033	11.1729
SSP1	EEU	Existing <1945	Floorspace	Million m2	1413.04	1291.49	1095.77	1031.07	963.713	895.631	824.791	746.69
SSP1	EEU	Existing 1946-1990	Floorspace	Million m2	959.667	839.667	618.228	511.421	403.676	293.564	186.502	97.2817
SSP1	EEU	Existing 1991-2015	Floorspace	Million m2	933.131	921.518	828.16	791.594	745.927	687.433	611.427	514.559
SSP1	EEU	New - standard	Floorspace	Million m2	0	0	0	0	0	0	0	0
SSP1	EEU	New - advanced	Floorspace	Million m2	0	257.612	513.483	791.334	1083.76	1384.98	1686.07	1975.07
SSP1	EEU	Renovated - standard	Floorspace	Million m2	0	73.4661	271.113	330.721	373.516	405.584	433.988	465.913
SSP1	EEU	Renovated - advanced	Floorspace	Million m2	0	142.361	414.305	470.827	511.04	539.894	562.955	586.665
SSP1	FSU	Existing <1945	Floorspace	Million m2	1256.21	1112.8	998.792	929.527	851.29	780.148	739.895	712.125
SSP1	FSU	Existing 1946-1990	Floorspace	Million m2	2400.83	2174.29	1852.29	1580.6	1315.34	1063.25	852.461	662.365
SSP1	FSU	Existing 1991-2015	Floorspace	Million m2	2221.6	2282.5	2273.46	2243.8	2142.05	1978.39	1779.25	1552.31
SSP1	FSU	New - standard	Floorspace	Million m2	0	527.066	1036.22	1495.52	1985.77	2489.2	2975.06	3417.19
SSP1	FSU	New - advanced	Floorspace	Million m2	0	5.99161	34.3379	176.934	348.618	543.611	755.357	973.459
SSP1	FSU	Renovated - standard	Floorspace	Million m2	0	150.099	358.038	508.545	654.699	785.953	879.736	949.846
SSP1	FSU	Renovated - advanced	Floorspace	Million m2	0	292.358	671.624	878.626	1053.42	1192.49	1286.37	1354.21
SSP1	LAC	Slum	Floorspace	Million m2	649.317	812.755	923.555	967.296	940.13	848.229	707.948	541.953
SSP1	LAC	Existing <1945	Floorspace	Million m2	628.539	562.001	538.918	502.99	456.7	406.758	363.579	328.99
SSP1	LAC	Existing 1946-1990	Floorspace	Million m2	3507.51	3479.97	3513.18	3410.33	3183.24	2857.1	2494.61	2133.94
SSP1	LAC	Existing 1991-2015	Floorspace	Million m2	5287.8	5686.26	6142.19	6404.84	6438.18	6245.95	5878.98	5381.02
SSP1	LAC	New - standard	Floorspace	Million m2	0	1072.04	2460.83	4103.37	5959.02	7908.5	9835.06	11631.7
SSP1	LAC	New - advanced	Floorspace	Million m2	0	0.00277	0.20312	46.5542	124.208	238.335	383.335	552.756
SSP1	LAC	Renovated - standard	Floorspace	Million m2	0	639.254	902.027	1164.15	1453.91	1768.89	2062.16	2309.89
SSP1	LAC	Renovated - advanced	Floorspace	Million m2	0	0	0	0	0	0	0	0
SSP1	MEA	Slum	Floorspace	Million m2	512.208	669.938	807.801	917.458	987.322	1008.79	975.537	894.863
SSP1	MEA	Existing <1945	Floorspace	Million m2	546.984	528.994	513.546	478.669	429.37	393.321	376.529	362.382
SSP1	MEA	Existing 1946-1990	Floorspace	Million m2	2351.83	2333.37	2271.59	2087.79	1792.67	1475.38	1234.04	1049.2
SSP1	MEA	Existing 1991-2015	Floorspace	Million m2	3872.37	4201.2	4480.12	4600.53	4467.17	4113.01	3651.75	3188.37
SSP1	MEA	New - standard	Floorspace	Million m2	0	1085.15	2485	4085.23	5863.06	7719.49	9578.56	11347.6
SSP1	MEA	New - advanced	Floorspace	Million m2	0	0.00723	0.3016	61.272	182.412	379.586	617.418	879.378
SSP1	MEA	Renovated - standard	Floorspace	Million m2	0	478.829	911.167	1395.27	2023.42	2675.07	3210.47	3599.22
SSP1	MEA	Renovated - advanced	Floorspace	Million m2	0	0	0	0	0	0	0	0
SSP1	NAM	Existing <1945	Floorspace	Million m2	5883.26	5219.67	4223.83	3072.12	2327.44	1859.07	1597.08	1422.24
SSP1	NAM	Existing 1946-1990	Floorspace	Million m2	8133.89	7400.82	6160.19	4589.3	3403.84	2635.64	2210.81	1797.99
SSP1	NAM	Existing 1991-2015	Floorspace	Million m2	9562.41	8832.06	7426.5	5639.76	4530.68	3923.18	3573.86	3270.47
SSP1	NAM	New - standard	Floorspace	Million m2	0	936.072	1691.64	2231.35	2777.67	3333.43	3914.63	4522.81
SSP1	NAM	New - advanced	Floorspace	Million m2	0	592.031	1419.23	2507.59	3639.81	4811.14	5986.15	7166.85
SSP1	NAM	Renovated - standard	Floorspace	Million m2	0	663.378	2004.65	3706.57	4731.79	5209.69	5358.14	5450.63
SSP1	NAM	Renovated - advanced	Floorspace	Million m2	0	686.207	2117.97	3959.52	4923.53	5219.4	5229.26	5209.06
SSP1	PAO	Existing <1945	Floorspace	Million m2	1309.82	1074.7	951.292	841.293	738.389	641.494	553.902	474.635
SSP1	PAO	Existing 1946-1990	Floorspace	Million m2	2415.01	2192.61	2042.42	1895.47	1742.98	1584.67	1426.75	1270.47
SSP1	PAO	Existing 1991-2015	Floorspace	Million m2	2979.09	2791.79	2690.07	2584.44	2465.03	2325.53	2169.48	1997.97
SSP1	PAO	New - standard	Floorspace	Million m2	0	481.919	860.899	1192.66	1508.62	1812.48	2104.72	2383.15
SSP1	PAO	New - advanced	Floorspace	Million m2	0	0.25196	1.88046	30.3018	58.4068	86.165	112.667	137.773
SSP1	PAO	Renovated - standard	Floorspace	Million m2	0	171.57	203.11	224.747	257.741	310.941	376.191	453.517
SSP1	PAO	Renovated - advanced	Floorspace	Million m2	0	48.8054	55.6064	60.1814	68.431	80.7104	93.1641	105.465
SSP1	PAS	Slum	Floorspace	Million m2	65.0088	54.1893	45.4929	38.9218	34.2384	30.8308	31.1971	25.8651
SSP1	PAS	Existing <1945	Floorspace	Million m2	666.387	716.837	766.431	810.742	848.377	878.814	901.967	918.094
SSP1	PAS	Existing 1946-1990	Floorspace	Million m2	2458.21	2322.96	2104.6	1820.95	1507.76	1197.59	917.077	676.348
SSP1	PAS	Existing 1991-2015	Floorspace	Million m2	6162.25	6642.25	6827.45	6693	6272.84	5638.33	4875.2	4065.36
SSP1	PAS	New - standard	Floorspace	Million m2	0	1335.2	3092.28	5102.53	7341.75	9645.75	11854.4	13832.7
SSP1	PAS	New - advanced	Floorspace	Million m2	0	3.30196	82.6028	262.2	448.78	631.719	801.644	951.597
SSP1	PAS	Renovated - standard	Floorspace	Million m2	0	91.0807	122.168	136.282	146.192	154.706	162.157	168.655
SSP1	PAS	Renovated - advanced	Floorspace	Million m2	0	0.00559	0.00886	0.01053	0.01136	0.01183	0.01264	0.01453
SSP1	SAS	Slum	Floorspace	Million m2	204.331	339.043	477.771	610.978	721	792.309	816.712	798.112
SSP1	SAS	Existing <1945	Floorspace	Million m2	2190.84	2557.47	2863.99	3090.75	3241.3	3328.43	3357	3334.5
SSP1	SAS	Existing 1946-1990	Floorspace	Million m2	7650.16	8851.68	9664.59	10023.9	9959.95	9551.34	8864.69	7986.88
SSP1	SAS	Existing 1991-2015	Floorspace	Million m2	11365.5	13972.1	16184.3	17800.7	18748.6	19039.6	18712.8	17854.3
SSP1	SAS	New - standard	Floorspace	Million m2	0	2279.75	5737.96	10086.8	15327.3	21193.2	27395.4	33574.6
SSP1	SAS	New - advanced	Floorspace	Million m2	0	28.4975	109.793	311.834	583.113	914.476	1304.29	1732.56
SSP1	SAS	Renovated - standard	Floorspace	Million m2	0	79.5154	134.627	190.376	247.923	310.416	380.489	457.591
SSP1	SAS	Renovated - advanced	Floorspace	Million m2	0	3.98856	5.03764	16.437	43.9516	69.8938	97.1669	139.428
SSP1	WEU	Existing <1945	Floorspace	Million m2	6473.4	5431.26	3970.5	2826.17	2275.44	1938.23	1682.24	1494.57
SSP1	WEU	Existing 1946-1990	Floorspace	Million m2	5711.33	4799.76	3509.78	2449.91	1760.68	1312.54	1035.23	790.949
SSP1	WEU	Existing 1991-2015	Floorspace	Million m2	8214.55	7699.16	6929.68	6256.03	5659.5	4946.61	4148.48	3362.9
SSP1	WEU	New - standard	Floorspace	Million m2	0	0	0	0	0	0	0	0
SSP1	WEU	New - advanced	Floorspace	Million m2	0	1628.25	3047.61	4496.04	5995.27	7544.46	9118.41	10693.4
SSP1	WEU	Renovated - standard	Floorspace	Million m2	0	527.284	1697.49	2684.83	3127.14	3454.35	3766.35	4031.75
SSP1	WEU	Renovated - advanced	Floorspace	Million m2	0	729.949	2122.72	3049.36	3397.27	3614.49	3795.91	3922.77
SSP2	AFR	Slum	Floorspace	Million m2	606.196	865.938	1139.3	1426.13	1703.79	1946.44	2130.55	2242.34
SSP2	AFR	Existing <1945	Floorspace	Million m2	759.737	850.721	934.92	1003.92	1058.23	1098.94	1129.8	1152.18
SSP2	AFR	Existing 1946-1990	Floorspace	Million m2	2917.32	3117.96	3257.52	3284.75	3202.61	3023.42	2787.55	2513.35
SSP2	AFR	Existing 1991-2015	Floorspace	Million m2	5307.1	6083.81	6769.89	7274.24	7563.49	7620.27	7487.1	7197.7
SSP2	AFR	New - standard	Floorspace	Million m2	0	1297.69	3293.5	5842.98	8981.24	12641.6	16719	21085.2
SSP2	AFR	New - advanced	Floorspace	Million m2	0	0	0.00336	1.0275	2.22507	3.50541	5.12643	7.10854
SSP2	AFR	Renovated - standard	Floorspace	Million m2	0	140.086	179.536	221.276	298.12	425.417	539.469	629.582
SSP2	AFR	Renovated - advanced	Floorspace	Million m2	0	0	0	0	0	0	0	0
SSP2	CPA	Slum	Floorspace	Million m2	3735.06	3640.2	3306.38	2907.54	2477.92	2041.7	1616.43	1210.74
SSP2	CPA	Existing <1945	Floorspace	Million m2	6210.43	5543.81	4801.23	3804.68	3517.55	3418.37	3279.23	3099.94
SSP2	CPA	Existing 1946-1990	Floorspace	Million m2	10765.6	7143.29	4117.08	1888.39	564.591	241.056	128.758	66.7574
SSP2	CPA	Existing 1991-2015	Floorspace	Million m2	36142.1	32219.8	26861.3	20267.5	14453	9135.79	4600.31	2082.53
SSP2	CPA	New - standard	Floorspace	Million m2	0	7967.53	16589.3	25021.3	32778.3	39312.6	44302.3	47644
SSP2	CPA	New - advanced	Floorspace	Million m2	0	0.14318	12.2529	144.488	322.551	533.636	758.58	975.479
SSP2	CPA	Renovated - standard	Floorspace	Million m2	0	3250.6	6816.49	10658.4	12136.1	12923.1	13523.4	13999.1
SSP2	CPA	Renovated - advanced	Floorspace	Million m2	0	0	0	0	0	0	0	0
SSP2	EEU	Existing <1945	Floorspace	Million m2	1408.68	1271.57	1153.23	1068.08	989.982	911.781	835.474	763.579
SSP2	EEU	Existing 1946-1990	Floorspace	Million m2	956.635	819.575	667.284	542.097	427.421	316.987	213.184	122.952
SSP2	EEU	Existing 1991-2015	Floorspace	Million m2	930.07	910.746	874.661	837.006	789.582	723.97	639.191	543.406
SSP2	EEU	New - standard	Floorspace	Million m2	0	13.3091	26.9346	42.4357	58.3536	74.4588	90.2021	105.051
SSP2	EEU	New - advanced	Floorspace	Million m2	0	239.493	470.6	716.997	975.164	1242.19	1512.3	1776.14
SSP2	EEU	Renovated - standard	Floorspace	Million m2	0	155.807	339.963	454.288	532.876	601.522	662.963	712.928
SSP2	EEU	Renovated - advanced	Floorspace	Million m2	0	49.7635	89.5814	105.696	116.787	126.237	133.968	139.823
SSP2	FSU	Existing <1945	Floorspace	Million m2	1248.87	1070.98	1003.34	941.866	890.054	837.327	784.177	733.788
SSP2	FSU	Existing 1946-1990	Floorspace	Million m2	2387.5	2099.92	1865.93	1591.88	1315.74	1052.05	824.764	641.54
SSP2	FSU	Existing 1991-2015	Floorspace	Million m2	2208.74	2222.65	2283.7	2284.41	2214.34	2065.22	1850.39	1594.01
SSP2	FSU	New - standard	Floorspace	Million m2	0	512.793	998.264	1477.12	1995.57	2540.8	3082.18	3593.56
SSP2	FSU	New - advanced	Floorspace	Million m2	0	1.84847	13.2733	80.0252	159.16	249.099	352.542	466.364
SSP2	FSU	Renovated - standard	Floorspace	Million m2	0	309.185	474.365	650.459	834.308	1032.65	1230.48	1406.04
SSP2	FSU	Renovated - advanced	Floorspace	Million m2	0	112.584	182.093	243.772	291.664	333.603	369.068	397.325
SSP2	LAC	Slum	Floorspace	Million m2	648.2	760.991	850.494	910.129	935.947	924.73	877.963	800.68
SSP2	LAC	Existing <1945	Floorspace	Million m2	627.112	531.877	491.507	447.209	404.079	361.131	319.932	284.158
SSP2	LAC	Existing 1946-1990	Floorspace	Million m2	3499.94	3283.86	3193.81	3034.98	2814.83	2544.95	2233.96	1915.22
SSP2	LAC	Existing 1991-2015	Floorspace	Million m2	5276.23	5363.56	5577.07	5686.94	5670.83	5525.06	5244.81	4845.6
SSP2	LAC	New - standard	Floorspace	Million m2	0	989.549	2128.19	3425.54	4872.08	6412.46	7985.32	9529.21
SSP2	LAC	New - advanced	Floorspace	Million m2	0	0	0.01161	2.88569	8.21054	17.1581	29.7167	45.9856
SSP2	LAC	Renovated - standard	Floorspace	Million m2	0	561.564	737.216	896.648	1051.94	1211.07	1396.11	1599.18
SSP2	LAC	Renovated - advanced	Floorspace	Million m2	0	0	0	0	0	0	0	0
SSP2	MEA	Slum	Floorspace	Million m2	511.379	649.037	773.116	881.234	964.889	1017.67	1029.28	1001.92
SSP2	MEA	Existing <1945	Floorspace	Million m2	546.145	498.315	480.559	453.688	412.374	366.273	336.357	318.779
SSP2	MEA	Existing 1946-1990	Floorspace	Million m2	2348.35	2190.03	2106.86	1958.89	1719.89	1427.21	1162.62	959.99
SSP2	MEA	Existing 1991-2015	Floorspace	Million m2	3866.96	3934.04	4085.99	4158.25	4083.82	3830.13	3469.54	3058.69
SSP2	MEA	New - standard	Floorspace	Million m2	0	990.376	2160.18	3473.29	4944.1	6528.85	8159.27	9765.74
SSP2	MEA	New - advanced	Floorspace	Million m2	0	0.00038	0.01845	3.77744	11.0705	24.0037	45.0556	75.9243
SSP2	MEA	Renovated - standard	Floorspace	Million m2	0	457.456	663.302	883.543	1210.11	1648.43	2052.48	2382.89
SSP2	MEA	Renovated - advanced	Floorspace	Million m2	0	0	0	0	0	0	0	0
SSP2	NAM	Existing <1945	Floorspace	Million m2	5883.26	5227.98	4536.61	3682.01	2850.72	2098.72	1671.64	1480.75
SSP2	NAM	Existing 1946-1990	Floorspace	Million m2	8133.89	7460.77	6670.72	5540.18	4333.71	3084.12	2286.61	1865.1
SSP2	NAM	Existing 1991-2015	Floorspace	Million m2	9562.41	8878.39	8193.83	7127.86	5944.61	4602.87	3842.87	3408.91
SSP2	NAM	New - standard	Floorspace	Million m2	0	1178.71	1986.37	2642.12	3325.53	4035.34	4770.75	5534.93
SSP2	NAM	New - advanced	Floorspace	Million m2	0	357.001	1156.02	2170.34	3227.95	4331.1	5463.8	6629.53
SSP2	NAM	Renovated - standard	Floorspace	Million m2	0	1186.99	2389.25	4253.13	6192.72	8221.44	9088.48	9342.53
SSP2	NAM	Renovated - advanced	Floorspace	Million m2	0	158.604	359.507	679.533	984.361	1253.53	1328.12	1335.45
SSP2	PAO	Existing <1945	Floorspace	Million m2	1306.44	1101.68	998.628	900.862	804.696	709.223	619.11	534.902
SSP2	PAO	Existing 1946-1990	Floorspace	Million m2	2409.57	2241.85	2135.81	2022.28	1894.82	1751.7	1599.77	1442.08
SSP2	PAO	Existing 1991-2015	Floorspace	Million m2	2972.73	2853.96	2810.29	2756.83	2684.21	2586.95	2465.74	2320.58
SSP2	PAO	New - standard	Floorspace	Million m2	0	491.445	895.916	1282.83	1664.15	2041.87	2414.11	2776.7
SSP2	PAO	New - advanced	Floorspace	Million m2	0	0.06927	0.57875	11.0782	22.1167	33.659	45.3354	56.9941
SSP2	PAO	Renovated - standard	Floorspace	Million m2	0	210.845	257.605	298.47	353.988	433.65	527.396	633.84
SSP2	PAO	Renovated - advanced	Floorspace	Million m2	0	4.15523	4.94424	5.87981	7.30775	9.28344	11.2943	13.2421
SSP2	PAS	Slum	Floorspace	Million m2	65.0134	52.5091	43.0441	36.5617	32.6169	30.6025	32.6805	30.0023
SSP2	PAS	Existing <1945	Floorspace	Million m2	666.768	685.569	706.895	728.283	748.887	767.845	784.251	797.544
SSP2	PAS	Existing 1946-1990	Floorspace	Million m2	2459.58	2205.09	1918.55	1614.34	1313.82	1034.07	789.343	582.674
SSP2	PAS	Existing 1991-2015	Floorspace	Million m2	6165.54	6316.98	6245.09	5957.7	5491.04	4894.09	4220.94	3524.88
SSP2	PAS	New - standard	Floorspace	Million m2	0	1218.83	2749.64	4358.36	6109.25	7906.03	9653.4	11266.2
SSP2	PAS	New - advanced	Floorspace	Million m2	0	0.45735	13.0733	159.126	310.794	459.31	597.117	719.531
SSP2	PAS	Renovated - standard	Floorspace	Million m2	0	63.2802	95.3543	115.532	127.891	136.411	144.601	153.381
SSP2	PAS	Renovated - advanced	Floorspace	Million m2	0	0	0	0	0	0	0	0
SSP2	SAS	Slum	Floorspace	Million m2	204.468	322.44	446.683	575.76	698.671	802.968	878.667	920.324
SSP2	SAS	Existing <1945	Floorspace	Million m2	2192.36	2360.14	2507.43	2621.14	2702.98	2757.48	2731.2	2608.18
SSP2	SAS	Existing 1946-1990	Floorspace	Million m2	7655.46	8157.59	8450.86	8495.09	8300.22	7903.35	7248.99	6364.77
SSP2	SAS	Existing 1991-2015	Floorspace	Million m2	11373.4	12877.4	14157.5	15099	15644	15791.3	15347	14163.7
SSP2	SAS	New - standard	Floorspace	Million m2	0	2051.9	4820.91	8115.61	12037.4	16463.6	21270.4	26243.6
SSP2	SAS	New - advanced	Floorspace	Million m2	0	14.2218	59.9734	163.832	296.283	454.253	631.623	822.423
SSP2	SAS	Renovated - standard	Floorspace	Million m2	0	52.3061	90.7513	127.381	161.299	193.07	562.18	1560.3
SSP2	SAS	Renovated - advanced	Floorspace	Million m2	0	0	0	0	0	0	0	0
SSP2	WEU	Existing <1945	Floorspace	Million m2	6448.77	5330.09	4344.11	3053.97	2420.94	2035.42	1758.81	1567.25
SSP2	WEU	Existing 1946-1990	Floorspace	Million m2	5689.27	4770.08	3891.03	2840.37	2054.16	1454	1105.27	852.058
SSP2	WEU	Existing 1991-2015	Floorspace	Million m2	8182.5	7847.78	7567.82	7060.86	6693.9	6225.55	5591.37	4791.02
SSP2	WEU	New - standard	Floorspace	Million m2	0	94.5462	180.479	273.532	369.573	468.401	566.342	661.934
SSP2	WEU	New - advanced	Floorspace	Million m2	0	1535.26	2887.67	4279.66	5737.77	7261	8826.13	10408.5
SSP2	WEU	Renovated - standard	Floorspace	Million m2	0	1031.33	2113.37	3812.83	4549.07	5004.93	5384.19	5788.63
SSP2	WEU	Renovated - advanced	Floorspace	Million m2	0	230.775	437.118	698.793	789.641	833.313	865.514	899.099
SSP3	AFR	Slum	Floorspace	Million m2	606.719	808.795	1019.96	1253.19	1501.99	1754.53	1998.08	2220.89
SSP3	AFR	Existing <1945	Floorspace	Million m2	760.443	775.18	794.66	811.263	825.51	837.849	848.169	856.759
SSP3	AFR	Existing 1946-1990	Floorspace	Million m2	2919.92	2871.67	2818.48	2719.57	2578.97	2404.14	2201.85	1981.43
SSP3	AFR	Existing 1991-2015	Floorspace	Million m2	5311.75	5593.63	5840.54	5998.05	6054.79	6008.64	5862.74	5625.44
SSP3	AFR	New - standard	Floorspace	Million m2	0	1157.55	2705.75	4491.24	6543.62	8821.7	11278.2	13864
SSP3	AFR	New - advanced	Floorspace	Million m2	0	0	0	0	0	0	0	0
SSP3	AFR	Renovated - standard	Floorspace	Million m2	0	125.971	158.086	173.355	187.453	205.541	227.149	251.759
SSP3	AFR	Renovated - advanced	Floorspace	Million m2	0	0	0	0	0	0	0	0
SSP3	CPA	Slum	Floorspace	Million m2	3721.05	3595.14	3313.88	3047	2815.54	2623.69	2466.46	2331.22
SSP3	CPA	Existing <1945	Floorspace	Million m2	6187.12	5405.95	4579.72	3776.08	3509.62	3322.26	2972.52	2809.43
SSP3	CPA	Existing 1946-1990	Floorspace	Million m2	10725	6899.06	3922.6	1916.85	602.453	201.946	105.382	54.1092
SSP3	CPA	Existing 1991-2015	Floorspace	Million m2	36005.9	30815.8	24739.8	18709.3	13481.3	8750.68	4594.66	2313.56
SSP3	CPA	New - standard	Floorspace	Million m2	0	7499	15055.6	22065	28210.6	33176.6	36822.8	39158.4
SSP3	CPA	New - advanced	Floorspace	Million m2	0	0.06726	3.62908	29.2802	59.0853	88.6988	114.043	132.782
SSP3	CPA	Renovated - standard	Floorspace	Million m2	0	3117.01	6335.5	8649.97	9360.05	9791.47	10517.1	10892.1
SSP3	CPA	Renovated - advanced	Floorspace	Million m2	0	0	0	0	0	0	0	0
SSP3	EEU	Existing <1945	Floorspace	Million m2	1401.66	1240.24	1160.96	1095.69	1030.31	962.76	896.932	832.456
SSP3	EEU	Existing 1946-1990	Floorspace	Million m2	951.758	800.56	690.24	590.512	484.586	375.269	275.252	186.752
SSP3	EEU	Existing 1991-2015	Floorspace	Million m2	925.455	853.133	817.406	785.46	737.611	671.852	595.807	511.802
SSP3	EEU	New - standard	Floorspace	Million m2	0	12.4834	25.3284	40.2846	54.5544	68.1253	81.391	93.9685
SSP3	EEU	New - advanced	Floorspace	Million m2	0	231.025	440.101	652.09	867	1084.17	1299.86	1508.08
SSP3	EEU	Renovated - standard	Floorspace	Million m2	0	193.508	252.428	266.679	291.483	332.637	369.522	402.436
SSP3	EEU	Renovated - advanced	Floorspace	Million m2	0	0.52954	0.59197	0.59313	0.60374	0.63616	0.66708	0.69734
SSP3	FSU	Existing <1945	Floorspace	Million m2	1242.34	1073.21	1008.37	956.505	913.447	876.362	844.416	816.232
SSP3	FSU	Existing 1946-1990	Floorspace	Million m2	2374.33	2075.36	1842.42	1594.44	1337.84	1083.58	850.643	642.824
SSP3	FSU	Existing 1991-2015	Floorspace	Million m2	2196.75	2113.91	2104.17	2062.37	1980.91	1853.02	1682.47	1477.06
SSP3	FSU	New - standard	Floorspace	Million m2	0	485.861	911.994	1338.07	1783.48	2241.25	2692.18	3118.74
SSP3	FSU	New - advanced	Floorspace	Million m2	0	0.83443	4.44899	22.3881	42.8905	65.5611	92.1731	122.686
SSP3	FSU	Renovated - standard	Floorspace	Million m2	0	245.228	314.646	380.131	456.226	545.787	640.783	733.973
SSP3	FSU	Renovated - advanced	Floorspace	Million m2	0	1.02459	1.55681	2.04629	2.53976	2.98765	3.40308	3.75443
SSP3	LAC	Slum	Floorspace	Million m2	647.398	732.398	808.423	874.408	928.814	969.713	995.765	1007.55
SSP3	LAC	Existing <1945	Floorspace	Million m2	626.098	522.291	464.787	411.362	362.855	319.83	281.367	246.478
SSP3	LAC	Existing 1946-1990	Floorspace	Million m2	3494.63	3163.91	2955.19	2726.36	2473.99	2202.95	1923.45	1642.05
SSP3	LAC	Existing 1991-2015	Floorspace	Million m2	5268.01	5144.64	5134.87	5075.51	4945.93	4742.27	4468.7	4133.8
SSP3	LAC	New - standard	Floorspace	Million m2	0	912.973	1852.26	2833.31	3865.27	4922.13	5975.35	6998.68
SSP3	LAC	New - advanced	Floorspace	Million m2	0	0	0.0009	0.09336	0.21629	0.37694	0.64024	1.06485
SSP3	LAC	Renovated - standard	Floorspace	Million m2	0	383.088	507.333	606.129	702.993	805.632	916.841	1033.62
SSP3	LAC	Renovated - advanced	Floorspace	Million m2	0	0	0	0	0	0	0	0
SSP3	MEA	Slum	Floorspace	Million m2	510.771	616.804	714.727	809.027	898.388	974.354	1034.05	1075.18
SSP3	MEA	Existing <1945	Floorspace	Million m2	545.171	474.147	443.215	411.215	373.993	334.22	300.249	275.317
SSP3	MEA	Existing 1946-1990	Floorspace	Million m2	2344.46	2075.49	1925.83	1754.19	1543.02	1298.83	1061.79	853.843
SSP3	MEA	Existing 1991-2015	Floorspace	Million m2	3860.92	3721.97	3704.78	3656.29	3540.51	3333.7	3045.94	2702.97
SSP3	MEA	New - standard	Floorspace	Million m2	0	946.47	1960.25	3003.16	4098.01	5229.85	6362.04	7460.25
SSP3	MEA	New - advanced	Floorspace	Million m2	0	0	0.00028	0.04501	0.12624	0.26887	0.50168	0.86313
SSP3	MEA	Renovated - standard	Floorspace	Million m2	0	406.309	519.559	625.869	779.868	996.07	1234.85	1463.11
SSP3	MEA	Renovated - advanced	Floorspace	Million m2	0	0	0	0	0	0	0	0
SSP3	NAM	Existing <1945	Floorspace	Million m2	5883.26	5336.99	4767.75	4177.18	3572.31	2967.53	2445.42	1991.2
SSP3	NAM	Existing 1946-1990	Floorspace	Million m2	8133.89	7539.04	6860.62	6085.06	5216.7	4270.81	3371.91	2530.88
SSP3	NAM	Existing 1991-2015	Floorspace	Million m2	9562.41	8776.76	7934.15	7032.47	6061.06	5073.75	4352.96	3797.31
SSP3	NAM	New - standard	Floorspace	Million m2	0	1095.93	1959.91	2741.97	3558.45	4407.54	5280.99	6182.02
SSP3	NAM	New - advanced	Floorspace	Million m2	0	444.637	1202.26	2115.37	3074.89	4082.75	5128.76	6214.91
SSP3	NAM	Renovated - standard	Floorspace	Million m2	0	1330.59	2722.49	4179.49	5693.3	7179.62	8165.87	8774.61
SSP3	NAM	Renovated - advanced	Floorspace	Million m2	0	3.83025	8.05084	11.9248	15.5644	18.2874	19.4353	20.0337
SSP3	PAO	Existing <1945	Floorspace	Million m2	1304.09	1115.91	997.104	893.746	801.298	718.818	645.638	580.342
SSP3	PAO	Existing 1946-1990	Floorspace	Million m2	2405.8	2229.88	2099.85	1973.35	1846.22	1717.95	1588.76	1458.74
SSP3	PAO	Existing 1991-2015	Floorspace	Million m2	2968.33	2819.87	2743.17	2664.88	2576.76	2476.52	2364.44	2240.17
SSP3	PAO	New - standard	Floorspace	Million m2	0	484.994	875.83	1251.75	1617.67	1976.93	2328.74	2670.15
SSP3	PAO	New - advanced	Floorspace	Million m2	0	0.02515	0.13945	1.35752	2.67665	4.10861	5.56339	7.02696
SSP3	PAO	Renovated - standard	Floorspace	Million m2	0	147.14	191.085	212.537	230.336	249.491	271.181	298.144
SSP3	PAO	Renovated - advanced	Floorspace	Million m2	0	0.01802	0.0227	0.02452	0.02589	0.02705	0.02831	0.03037
SSP3	PAS	Slum	Floorspace	Million m2	65.0193	50.9844	40.5071	33.5113	29.5585	28.0692	30.7966	29.7139
SSP3	PAS	Existing <1945	Floorspace	Million m2	667.368	660.574	658.431	659.44	662.568	666.959	671.916	676.912
SSP3	PAS	Existing 1946-1990	Floorspace	Million m2	2461.56	2108.59	1763.28	1437.11	1140.89	881.636	664.396	487.38
SSP3	PAS	Existing 1991-2015	Floorspace	Million m2	6170.31	6047.61	5756.4	5324.6	4789.36	4191.29	3569.88	2960.02
SSP3	PAS	New - standard	Floorspace	Million m2	0	1137.78	2456.46	3855.72	5296.35	6711.95	8043.7	9243.71
SSP3	PAS	New - advanced	Floorspace	Million m2	0	0	0	0	0	0	0	0
SSP3	PAS	Renovated - standard	Floorspace	Million m2	0	38.2564	62.5446	77.9835	87.8681	94.3242	98.7331	101.937
SSP3	PAS	Renovated - advanced	Floorspace	Million m2	0	0	0	0	0	0	0	0
SSP3	SAS	Slum	Floorspace	Million m2	204.607	302.875	404.932	515.257	629.348	740.708	843.137	931.975
SSP3	SAS	Existing <1945	Floorspace	Million m2	2194.03	2191.55	2194.21	2191.56	2184.84	2174.52	2159.45	2139.06
SSP3	SAS	Existing 1946-1990	Floorspace	Million m2	7661.29	7563.89	7364.91	7055.3	6659.75	6185.69	5645.86	5077.14
SSP3	SAS	Existing 1991-2015	Floorspace	Million m2	11382	11938.5	12327.1	12520.8	12541.1	12365.8	11976.6	11397
SSP3	SAS	New - standard	Floorspace	Million m2	0	1909.95	4251.96	6801.87	9570.09	12532.8	15666.8	18869.2
SSP3	SAS	New - advanced	Floorspace	Million m2	0	0	0	0	0	0	0	0
SSP3	SAS	Renovated - standard	Floorspace	Million m2	0	28.6054	50.707	69.5478	86.0187	100.953	114.881	128.065
SSP3	SAS	Renovated - advanced	Floorspace	Million m2	0	0	0	0	0	0	0	0
SSP3	WEU	Existing <1945	Floorspace	Million m2	6431.73	5294.21	4322.32	3760.49	3281.55	2847.74	2424.45	2018.81
SSP3	WEU	Existing 1946-1990	Floorspace	Million m2	5674.28	4729.39	3855.32	3205.78	2585.77	1975.8	1400.45	993.191
SSP3	WEU	Existing 1991-2015	Floorspace	Million m2	8160.73	7738.69	7329.37	6957.66	6635.44	6253.76	5763.82	5154.68
SSP3	WEU	New - standard	Floorspace	Million m2	0	89.493	170.966	260.41	352.505	447.189	537.944	624.058
SSP3	WEU	New - advanced	Floorspace	Million m2	0	1524.72	2849.09	4195.83	5593.75	7043.65	8528.39	10026.1
SSP3	WEU	Renovated - standard	Floorspace	Million m2	0	1264.75	2551.96	3122.5	3466.44	3767.82	4137.78	4503.41
SSP3	WEU	Renovated - advanced	Floorspace	Million m2	0	4.77134	8.74983	9.73293	10.2533	10.6316	11.2127	11.9283

## Sheet: floor_by_fuel
Scenario	Region	Fuel_Heating	Variable	Unit	2015	2020	2025	2030	2035	2040	2045	2050
SSP1	AFR	Biomass	Floorspace	Million m2	1849.16	2140.87	2358.23	2487.32	2540.37	2515.65	2410.24	2232.32
SSP1	AFR	Coal	Floorspace	Million m2	1026.72	1197.19	1327.64	1409.49	1441.71	1426.97	1372.18	1285.15
SSP1	AFR	District heating	Floorspace	Million m2	0	0	0	0	0	0	0	0
SSP1	AFR	Electricity	Floorspace	Million m2	1230.36	1652.23	2258.51	2902.5	3555.2	4188.26	4751.31	5227.15
SSP1	AFR	Gas	Floorspace	Million m2	0.41141	672.8	1516.43	2579.17	3821.04	5179.71	6622.76	8099.05
SSP1	AFR	Oil	Floorspace	Million m2	848.185	988.066	1093.51	1156.62	1179.17	1163.55	1110.46	1025.45
SSP1	AFR	No heating	Floorspace	Million m2	4629.16	6932.66	9666.83	12688.9	15994.2	19491.7	23058.5	26567.7
SSP1	CPA	Biomass	Floorspace	Million m2	7010.32	5517.14	3732.64	2747.34	1828.31	1027.32	474.504	227.529
SSP1	CPA	Coal	Floorspace	Million m2	20987.4	17982	14789.7	11155.9	8008.2	5502.94	3523.4	2514.04
SSP1	CPA	District heating	Floorspace	Million m2	6794.27	8571.72	9857	10666.6	11152.8	11448.3	11676.7	11935
SSP1	CPA	Electricity	Floorspace	Million m2	19124.5	14624.3	7829.92	6345.71	5904.05	5779.9	5869.41	5767.92
SSP1	CPA	Gas	Floorspace	Million m2	0	8082.18	19425.6	24837.1	28741.5	31585.8	33447.6	34339.1
SSP1	CPA	Oil	Floorspace	Million m2	0	1.07327	6.2484	8.31183	9.73486	10.4482	10.8216	10.8425
SSP1	CPA	No heating	Floorspace	Million m2	3171.56	3557.29	3930.34	4226.05	4448.76	4602.86	4694.22	4728.61
SSP1	EEU	Biomass	Floorspace	Million m2	698.458	656.962	624.219	576.652	520.332	457.784	391.451	322.314
SSP1	EEU	Coal	Floorspace	Million m2	763.669	718.515	674.422	643.678	598.173	540.52	472.188	397.859
SSP1	EEU	District heating	Floorspace	Million m2	573.021	662.185	738.622	800.317	850.902	890.845	919.945	939.724
SSP1	EEU	Electricity	Floorspace	Million m2	276.329	399.321	590.887	767.465	938.551	1103.32	1270.82	1446.33
SSP1	EEU	Gas	Floorspace	Million m2	871.405	975.223	1020.36	1051.67	1095.2	1144.97	1188.5	1221.78
SSP1	EEU	Oil	Floorspace	Million m2	110.222	98.9468	75.3775	67.7912	56.9016	45.9996	37.3486	31.117
SSP1	EEU	No heating	Floorspace	Million m2	12.7332	14.9633	17.1707	19.3984	21.577	23.6373	25.4835	27.0592
SSP1	FSU	Biomass	Floorspace	Million m2	535.439	507.83	486.463	429.266	354.221	267.917	196.976	132.22
SSP1	FSU	Coal	Floorspace	Million m2	219.13	214.318	208.889	189.106	162.279	130.841	105.065	80.5144
SSP1	FSU	District heating	Floorspace	Million m2	2853.77	3487.48	4039.43	4553.34	5026.58	5444.67	5788.4	6046.31
SSP1	FSU	Electricity	Floorspace	Million m2	234.346	238.932	401.504	613.893	847.786	1078.73	1265.7	1427.06
SSP1	FSU	Gas	Floorspace	Million m2	1637.48	1737.32	1788.93	1781.67	1784.48	1800	1835.47	1877.64
SSP1	FSU	Oil	Floorspace	Million m2	397.905	358.503	298.687	245.263	174.677	109.574	75.0937	56.2207
SSP1	FSU	No heating	Floorspace	Million m2	0.57068	0.7179	0.86526	1.01349	1.15908	1.2963	1.41887	1.52192
SSP1	LAC	Biomass	Floorspace	Million m2	206.581	93.3147	97.96	100.15	99.6132	96.5569	91.4025	84.484
SSP1	LAC	Coal	Floorspace	Million m2	30.0797	33.1502	35.1541	35.7934	35.0202	32.9758	29.7581	25.7291
SSP1	LAC	District heating	Floorspace	Million m2	0	0	0	0	0	0	0	0
SSP1	LAC	Electricity	Floorspace	Million m2	1782.32	1731.99	1955.43	2214.06	2442.53	2630.3	2776.57	2890.56
SSP1	LAC	Gas	Floorspace	Million m2	976.557	2259.76	3304.89	4441.14	5669.86	6932.33	8143.28	9234
SSP1	LAC	Oil	Floorspace	Million m2	3660.93	4020.98	4220.86	4214.66	4031.69	3692.58	3273.48	2817.44
SSP1	LAC	No heating	Floorspace	Million m2	3416.7	4113.09	4866.61	5593.73	6276.68	6889.02	7411.18	7827.98
SSP1	MEA	Biomass	Floorspace	Million m2	33.55	34.3859	28.3905	23.3422	22.2832	20.8419	18.887	16.599
SSP1	MEA	Coal	Floorspace	Million m2	4.43182	4.94118	5.29377	5.36653	5.13177	4.60197	3.82236	3.11159
SSP1	MEA	District heating	Floorspace	Million m2	0	0	0	0	0	0	0	0
SSP1	MEA	Electricity	Floorspace	Million m2	1336.24	1258.65	1360.39	1567.91	1757.38	1938.13	2104.95	2255.13
SSP1	MEA	Gas	Floorspace	Million m2	1691.75	2933.94	4204.37	5567.17	7071.12	8595.11	10044.1	11323.2
SSP1	MEA	Oil	Floorspace	Million m2	2414.55	2685.03	2824.19	2719.42	2438.22	2066.81	1697.47	1387.12
SSP1	MEA	No heating	Floorspace	Million m2	1802.87	2380.53	3046.89	3743	4451.3	5139.14	5775.1	6335.93
SSP1	NAM	Biomass	Floorspace	Million m2	1610.77	1500.51	1365.69	1203.67	1037.29	844.937	640.964	435.758
SSP1	NAM	Coal	Floorspace	Million m2	0	0	0	0	0	0	0	0
SSP1	NAM	District heating	Floorspace	Million m2	0	0	0	0	0	0	0	0
SSP1	NAM	Electricity	Floorspace	Million m2	3265.72	4193.03	5368.55	6858.82	8798.61	10314.8	11485	12678.4
SSP1	NAM	Gas	Floorspace	Million m2	14508.6	14638.7	14665.3	14529.4	13974.8	13730.1	13822.5	13909.9
SSP1	NAM	Oil	Floorspace	Million m2	3472.91	3260.67	2892.13	2348.49	1746.5	1314.3	1126.55	1015.45
SSP1	NAM	No heating	Floorspace	Million m2	721.51	737.338	752.34	765.832	777.577	787.405	794.917	800.606
SSP1	PAO	Biomass	Floorspace	Million m2	294.359	253.64	227.175	203.02	181.049	160.822	141.651	122.762
SSP1	PAO	Coal	Floorspace	Million m2	202.25	189.768	179.469	169.058	158.609	148.1	137.419	126.384
SSP1	PAO	District heating	Floorspace	Million m2	302.611	324.73	338.762	350.29	359.79	367.628	373.852	378.347
SSP1	PAO	Electricity	Floorspace	Million m2	876.671	925.279	1059.56	1202.4	1364.82	1552.83	1753.89	1965.49
SSP1	PAO	Gas	Floorspace	Million m2	2440.46	2640.55	2705.11	2743.77	2751.88	2730.46	2699.26	2664.02
SSP1	PAO	Oil	Floorspace	Million m2	2587.57	2427.4	2294.63	2159.62	2022.18	1880.52	1728.82	1563.66
SSP1	PAO	No heating	Floorspace	Million m2	0.00037	0.27937	0.56478	0.92066	1.27542	1.63163	1.98615	2.33348
SSP1	PAS	Biomass	Floorspace	Million m2	1314.74	1281.43	1205.31	1097.24	966.512	822.981	679.374	540.457
SSP1	PAS	Coal	Floorspace	Million m2	0	0	0	0	0	0	0	0
SSP1	PAS	District heating	Floorspace	Million m2	0	0	0	0	0	0	0	0
SSP1	PAS	Electricity	Floorspace	Million m2	238.001	420.66	639.215	873.876	1110.12	1333.76	1537.02	1703.37
SSP1	PAS	Gas	Floorspace	Million m2	0	0	0	0	0	0	0	0
SSP1	PAS	Oil	Floorspace	Million m2	0	0	0	0	0	0	0	0
SSP1	PAS	No heating	Floorspace	Million m2	7799.11	9463.74	11196.5	12893.5	14523.3	16021	17327.3	18394.8
SSP1	SAS	Biomass	Floorspace	Million m2	2139.52	2573.17	2908.78	3113.04	3175.97	3120.79	2958.29	2692.96
SSP1	SAS	Coal	Floorspace	Million m2	0	0	0	0	0	0	0	0
SSP1	SAS	District heating	Floorspace	Million m2	0	0	0	0	0	0	0	0
SSP1	SAS	Electricity	Floorspace	Million m2	485.846	930.832	1539.43	2263.44	3088.88	3960.07	4840.22	5706.56
SSP1	SAS	Gas	Floorspace	Million m2	0	0	0	0	0	0	0	0
SSP1	SAS	Oil	Floorspace	Million m2	0	0	0	0	0	0	0	0
SSP1	SAS	No heating	Floorspace	Million m2	18785.5	24608	30729.8	36755.3	42608.3	48118.7	53130	57478.5
SSP1	WEU	Biomass	Floorspace	Million m2	2434.66	1947.49	1573.13	1313.74	1035.82	825.631	663.824	506.668
SSP1	WEU	Coal	Floorspace	Million m2	901.815	828.688	748.704	687.401	592.84	494.681	426.252	355.08
SSP1	WEU	District heating	Floorspace	Million m2	1061.57	1148.09	1208.63	1249.77	1244.28	1208.64	1206.04	1222.09
SSP1	WEU	Electricity	Floorspace	Million m2	2716.02	4392.79	6447.66	7808.13	9099.65	10374.6	11713.8	13037.8
SSP1	WEU	Gas	Floorspace	Million m2	9420.54	9039.41	8417.44	8237.53	8146.37	8114.02	8030.2	7941.47
SSP1	WEU	Oil	Floorspace	Million m2	3859.2	3453.3	2876.02	2459.27	2089.5	1785.9	1498.87	1225.14
SSP1	WEU	No heating	Floorspace	Million m2	5.47711	5.91326	6.18987	6.49751	6.83375	7.21239	7.60198	8.12002
SSP2	AFR	Biomass	Floorspace	Million m2	1850.28	2004.37	2109.92	2152.02	2129.26	2036.47	1917.98	1775.63
SSP2	AFR	Coal	Floorspace	Million m2	1027.35	1114.15	1177.18	1211.77	1218.96	1197.81	1147.97	1072.77
SSP2	AFR	District heating	Floorspace	Million m2	0	0	0	0	0	0	0	0
SSP2	AFR	Electricity	Floorspace	Million m2	1231.16	1526.34	2002.05	2540.94	3075.69	3566.31	3997.51	4362.48
SSP2	AFR	Gas	Floorspace	Million m2	0.41166	476.609	978.282	1555.95	2293.66	3206.66	4174.74	5162.91
SSP2	AFR	Oil	Floorspace	Million m2	848.702	1046.09	1264.13	1505.8	1739.8	1948.02	2169.3	2400.83
SSP2	AFR	No heating	Floorspace	Million m2	4632.45	6188.65	8043.12	10087.8	12352.3	14804.3	17391.1	20052.8
SSP2	CPA	Biomass	Floorspace	Million m2	6981.26	5837.95	4500.74	2916.75	2063.72	1408.59	812.876	377.212
SSP2	CPA	Coal	Floorspace	Million m2	20900.4	18575.5	15975.6	12868.5	9489.54	6792.72	4454.81	3100.54
SSP2	CPA	District heating	Floorspace	Million m2	6766.12	8565.43	9993.66	11176.9	12002.8	12624.4	13058.4	13687.5
SSP2	CPA	Electricity	Floorspace	Million m2	19045.3	15446.2	11556.9	8041.38	6596.39	5782.17	5216.79	4810.34
SSP2	CPA	Gas	Floorspace	Million m2	0	6502.88	13269.8	19792.6	23716.6	26527.9	28683.1	30207.6
SSP2	CPA	Oil	Floorspace	Million m2	0	1302.95	3292.13	5642.03	7825.44	9658.04	10966	11732.4
SSP2	CPA	No heating	Floorspace	Million m2	3160.03	3534.45	3915.11	4254.21	4555.46	4812.47	5017.02	5162.88
SSP2	EEU	Biomass	Floorspace	Million m2	696.371	646.911	609.014	559.712	505.606	448.559	389.747	333.696
SSP2	EEU	Coal	Floorspace	Million m2	761.232	722.998	698.121	665.055	619.228	561.588	495.958	426.48
SSP2	EEU	District heating	Floorspace	Million m2	571.131	649.893	715.515	773.345	822.832	864.514	897.908	922.232
SSP2	EEU	Electricity	Floorspace	Million m2	275.447	360.59	474.619	633.468	796.617	961.344	1131.09	1295.1
SSP2	EEU	Gas	Floorspace	Million m2	868.624	967.803	1020.89	1034.41	1054.77	1085.48	1108.44	1129.76
SSP2	EEU	Oil	Floorspace	Million m2	109.87	97.4325	87.5703	82.1741	70.7873	53.5031	40.2835	31.2556
SSP2	EEU	No heating	Floorspace	Million m2	12.7077	14.6398	16.523	18.4345	20.327	22.1579	23.8491	25.3491
SSP2	FSU	Biomass	Floorspace	Million m2	532.54	496.97	463.805	395.657	341.562	285.996	232.01	182.995
SSP2	FSU	Coal	Floorspace	Million m2	217.919	208.505	201.59	187.159	166.159	141.238	118.841	97.8026
SSP2	FSU	District heating	Floorspace	Million m2	2836.9	3363.95	3811.1	4236.29	4643.06	5022.2	5356.12	5629.84
SSP2	FSU	Electricity	Floorspace	Million m2	233.051	161.224	261.133	405.313	575.801	777.516	996.222	1209.48
SSP2	FSU	Gas	Floorspace	Million m2	1628.43	1739.45	1755.78	1753.98	1737.78	1714.22	1677.09	1640.82
SSP2	FSU	Oil	Floorspace	Million m2	395.706	359.168	326.721	290.176	235.388	168.365	112.001	70.2738
SSP2	FSU	No heating	Floorspace	Million m2	0.56868	0.70047	0.82955	0.95866	1.08615	1.20808	1.31955	1.41634
SSP2	LAC	Biomass	Floorspace	Million m2	205.986	90.5833	90.557	89.4977	87.0272	83.2134	78.2506	72.2194
SSP2	LAC	Coal	Floorspace	Million m2	30.0162	31.1904	31.7829	31.6153	30.6376	28.9297	26.6098	23.6973
SSP2	LAC	District heating	Floorspace	Million m2	0	0	0	0	0	0	0	0
SSP2	LAC	Electricity	Floorspace	Million m2	1778.81	1623.04	1758.55	1925.59	2077.62	2199.39	2288.4	2343.98
SSP2	LAC	Gas	Floorspace	Million m2	974.497	2007.13	2695.89	3408.96	4130.9	4845.56	5587.46	6333.3
SSP2	LAC	Oil	Floorspace	Million m2	3653.2	3905.36	4088.05	4166.87	4196.17	4179.09	4063.37	3873.71
SSP2	LAC	No heating	Floorspace	Million m2	3408.97	3834.1	4313.46	4781.8	5235.55	5660.38	6043.73	6373.13
SSP2	MEA	Biomass	Floorspace	Million m2	33.4975	33.239	30.4381	24.9392	22.558	20.9004	19.1877	17.4024
SSP2	MEA	Coal	Floorspace	Million m2	4.42491	4.63011	4.76355	4.76265	4.60045	4.24505	3.71751	3.07743
SSP2	MEA	District heating	Floorspace	Million m2	0	0	0	0	0	0	0	0
SSP2	MEA	Electricity	Floorspace	Million m2	1334.13	1163.26	1294.18	1452.63	1585.55	1684.44	1746.09	1775.43
SSP2	MEA	Gas	Floorspace	Million m2	1689.11	2590.96	3258.66	3949.45	4797.11	5809.37	6792.13	7701.78
SSP2	MEA	Oil	Floorspace	Million m2	2410.79	2691.45	2951.25	3139.77	3174.12	3048.19	2932.72	2862.73
SSP2	MEA	No heating	Floorspace	Million m2	1800.88	2235.71	2730.74	3241.13	3762.31	4275.42	4760.74	5203.52
SSP2	NAM	Biomass	Floorspace	Million m2	1610.77	1517.93	1364.66	1076.17	890.217	746.304	579.344	431.374
SSP2	NAM	Coal	Floorspace	Million m2	0	0	0	0	0	0	0	0
SSP2	NAM	District heating	Floorspace	Million m2	0	0	0	0	0	0	0	0
SSP2	NAM	Electricity	Floorspace	Million m2	3265.72	3784.38	5074.69	7261.36	9553.26	12009.9	13780.5	15126.7
SSP2	NAM	Gas	Floorspace	Million m2	14508.6	15117.3	14969.2	14056.7	13125.1	12314.7	12008.6	12149.8
SSP2	NAM	Oil	Floorspace	Million m2	3472.91	3288.33	3124.82	2925.14	2499.89	1751.26	1266.95	1061.84
SSP2	NAM	No heating	Floorspace	Million m2	721.51	740.5	758.89	775.755	791.174	805.013	816.921	827.404
SSP2	PAO	Biomass	Floorspace	Million m2	293.572	259.632	238.495	218.313	199.057	180.43	161.825	142.507
SSP2	PAO	Coal	Floorspace	Million m2	201.794	193.797	187.477	180.474	172.81	164.443	155.264	145.133
SSP2	PAO	District heating	Floorspace	Million m2	301.982	331.305	353.08	372.562	389.961	405.437	418.865	429.986
SSP2	PAO	Electricity	Floorspace	Million m2	874.696	944.106	1105.78	1288.59	1491.55	1719.84	1960.87	2211.52
SSP2	PAO	Gas	Floorspace	Million m2	2434.96	2695.83	2820.96	2911.07	2973.19	3010.29	3035.52	3050.89
SSP2	PAO	Oil	Floorspace	Million m2	2581.74	2479.05	2397.42	2306.33	2203.53	2084.4	1948.58	1796.16
SSP2	PAO	No heating	Floorspace	Million m2	0.00037	0.2811	0.5701	0.87908	1.1908	1.50756	1.82674	2.14358
SSP2	PAS	Biomass	Floorspace	Million m2	1314.83	1242.34	1140.74	1016.08	880.871	742.278	607.729	479.347
SSP2	PAS	Coal	Floorspace	Million m2	0	0	0	0	0	0	0	0
SSP2	PAS	District heating	Floorspace	Million m2	0	0	0	0	0	0	0	0
SSP2	PAS	Electricity	Floorspace	Million m2	238.017	406.825	600.588	807.562	1012.2	1204.54	1381.79	1530.54
SSP2	PAS	Gas	Floorspace	Million m2	0	0	0	0	0	0	0	0
SSP2	PAS	Oil	Floorspace	Million m2	0	0	0	0	0	0	0	0
SSP2	PAS	No heating	Floorspace	Million m2	7804.05	8893.56	10030.3	11146.3	12241.2	13281.5	14232.8	15064.4
SSP2	SAS	Biomass	Floorspace	Million m2	2140.97	2372.81	2548.14	2653.28	2690.33	2662.98	2235.07	1188.63
SSP2	SAS	Coal	Floorspace	Million m2	0	0	0	0	0	0	0	0
SSP2	SAS	District heating	Floorspace	Million m2	0	0	0	0	0	0	0	0
SSP2	SAS	Electricity	Floorspace	Million m2	486.174	857.955	1342.14	1895.28	2509.3	3160.15	4164.5	5785.91
SSP2	SAS	Gas	Floorspace	Million m2	0	0	0	0	0	0	0	0
SSP2	SAS	Oil	Floorspace	Million m2	0	0	0	0	0	0	0	0
SSP2	SAS	No heating	Floorspace	Million m2	18798.5	22605.2	26643.8	30649.2	34641.3	38542.9	42270.5	45708.7
SSP2	WEU	Biomass	Floorspace	Million m2	2424.13	1966.24	1662.7	1300.42	1033.97	841.695	713.215	598.659
SSP2	WEU	Coal	Floorspace	Million m2	898.383	839.285	792.307	740.778	657.953	554.234	471.389	416.982
SSP2	WEU	District heating	Floorspace	Million m2	1057.66	1149.46	1216.33	1272.32	1301.65	1292.94	1280.8	1315.49
SSP2	WEU	Electricity	Floorspace	Million m2	2705.68	4283.24	5599.43	6850.11	8089.48	9249.4	10459	11790.6
SSP2	WEU	Gas	Floorspace	Million m2	9384.7	9135.3	9021.58	9091.33	9145.9	9263.62	9329.4	9259.39
SSP2	WEU	Oil	Floorspace	Million m2	3844.51	3460.45	3123.08	2758.56	2379.26	2073.48	1836.13	1579.18
SSP2	WEU	No heating	Floorspace	Million m2	5.47666	5.8928	6.17601	6.49658	6.85053	7.25003	7.67068	8.21084
SSP3	AFR	Biomass	Floorspace	Million m2	1851.77	1877.76	1881.79	1858.26	1810.77	1741.94	1652.96	1546.55
SSP3	AFR	Coal	Floorspace	Million m2	1028.17	1043.17	1045.56	1032.47	1006.12	967.948	918.688	859.866
SSP3	AFR	District heating	Floorspace	Million m2	0	0	0	0	0	0	0	0
SSP3	AFR	Electricity	Floorspace	Million m2	1232.18	1400.26	1696.93	2039.59	2409.84	2789.14	3160.75	3511.37
SSP3	AFR	Gas	Floorspace	Million m2	0.412	354.079	675.686	1012.71	1389.78	1805.88	2239.57	2682.51
SSP3	AFR	Oil	Floorspace	Million m2	849.386	1082.8	1344.54	1616.45	1892.46	2165.46	2446.31	2730.68
SSP3	AFR	No heating	Floorspace	Million m2	4636.91	5574.73	6692.97	7887.18	9183.35	10562	11998	13469.3
SSP3	CPA	Biomass	Floorspace	Million m2	6955.01	5961.84	4787.08	3324.47	2263.76	1494.69	532.403	223.1
SSP3	CPA	Coal	Floorspace	Million m2	20821.9	17877.2	14971	11878.5	8789.67	6353.34	4395.8	3128.82
SSP3	CPA	District heating	Floorspace	Million m2	6740.73	8205.8	9223.36	9953.59	10408.5	10736.9	10914.6	11333.6
SSP3	CPA	Electricity	Floorspace	Million m2	18973.8	14502.4	10163.7	7506.61	6510.49	5852.78	5385.87	5013.99
SSP3	CPA	Gas	Floorspace	Million m2	0	5625.18	11166.2	15308.6	17615.4	19309.4	20958.6	21926.3
SSP3	CPA	Oil	Floorspace	Million m2	0	1889.02	4240.7	6722.8	8867.1	10555.5	11701.4	12328.2
SSP3	CPA	No heating	Floorspace	Million m2	3147.6	3270.52	3398.73	3498.87	3583.66	3652.88	3704.23	3737.56
SSP3	EEU	Biomass	Floorspace	Million m2	692.783	622.721	571.065	518.902	467.477	417.239	367.631	319.105
SSP3	EEU	Coal	Floorspace	Million m2	757.435	713.843	673.849	629.009	580.159	527.931	472.443	414.766
SSP3	EEU	District heating	Floorspace	Million m2	568.332	626.044	669.736	708.621	743.197	773.675	799.195	818.947
SSP3	EEU	Electricity	Floorspace	Million m2	274.073	279.142	351.73	440.299	542.645	664.509	783.936	898.252
SSP3	EEU	Gas	Floorspace	Million m2	864.291	975.586	1012.77	1032.06	1037.31	1025.95	1020.25	1019.27
SSP3	EEU	Oil	Floorspace	Million m2	109.322	100.147	92.6531	85.9059	77.5981	67.1863	55.9124	44.7963
SSP3	EEU	No heating	Floorspace	Million m2	12.6332	13.9902	15.2532	16.5139	17.7557	18.9558	20.0635	21.0502
SSP3	FSU	Biomass	Floorspace	Million m2	529.472	472.72	439.066	403.151	364.915	321.627	280.924	236.921
SSP3	FSU	Coal	Floorspace	Million m2	216.692	197.852	185.676	172.15	157.306	140.428	123.997	106.172
SSP3	FSU	District heating	Floorspace	Million m2	2822.21	3179.21	3449.22	3698.69	3936.83	4160.52	4359.47	4524.97
SSP3	FSU	Electricity	Floorspace	Million m2	231.739	159.786	204.761	257.699	329.036	421.455	521.777	624.847
SSP3	FSU	Gas	Floorspace	Million m2	1619.26	1628.88	1579.24	1527.24	1470.69	1408.72	1351.97	1300.1
SSP3	FSU	Oil	Floorspace	Million m2	393.479	356.318	328.874	296.163	257.612	214.78	166.822	121.089
SSP3	FSU	No heating	Floorspace	Million m2	0.56488	0.66815	0.76344	0.85527	0.94375	1.02686	1.10181	1.16626
SSP3	LAC	Biomass	Floorspace	Million m2	205.51	179.002	165.936	153.134	139.391	124.663	107.961	89.3842
SSP3	LAC	Coal	Floorspace	Million m2	29.9731	29.6291	29.0555	28.0863	26.7226	24.9822	22.8951	20.4587
SSP3	LAC	District heating	Floorspace	Million m2	0	0	0	0	0	0	0	0
SSP3	LAC	Electricity	Floorspace	Million m2	1776.38	1555.51	1613.02	1707.1	1803.42	1891.57	1960.87	2010.58
SSP3	LAC	Gas	Floorspace	Million m2	973.096	1614.56	1997.48	2354.13	2721.28	3100.74	3476.74	3840.9
SSP3	LAC	Oil	Floorspace	Million m2	3647.95	3867.28	4049.65	4176.59	4252.02	4272.84	4258.13	4207.99
SSP3	LAC	No heating	Floorspace	Million m2	3403.22	3613.32	3867.72	4108.12	4337.23	4548.11	4735.53	4893.93
SSP3	MEA	Biomass	Floorspace	Million m2	33.4316	31.8047	30.8474	29.5992	26.6739	20.7393	15.6234	12.9524
SSP3	MEA	Coal	Floorspace	Million m2	4.41741	4.35913	4.27463	4.13148	3.91983	3.61316	3.21118	2.73441
SSP3	MEA	District heating	Floorspace	Million m2	0	0	0	0	0	0	0	0
SSP3	MEA	Electricity	Floorspace	Million m2	1332.12	1097.59	1177.36	1283.55	1394.86	1497.9	1583.13	1647.4
SSP3	MEA	Gas	Floorspace	Million m2	1686.25	2312.97	2667.95	3023.33	3451	3964.44	4507.91	5038.78
SSP3	MEA	Oil	Floorspace	Million m2	2406.7	2668.44	2901.45	3078.28	3167.35	3157.98	3102.63	3033.62
SSP3	MEA	No heating	Floorspace	Million m2	1798.4	2126.03	2486.48	2840.91	3190.11	3522.62	3826.92	4096.04
SSP3	NAM	Biomass	Floorspace	Million m2	1610.77	1535.47	1450.48	1353.25	1239.39	1103.17	939.644	753.738
SSP3	NAM	Coal	Floorspace	Million m2	0	0	0	0	0	0	0	0
SSP3	NAM	District heating	Floorspace	Million m2	0	0	0	0	0	0	0	0
SSP3	NAM	Electricity	Floorspace	Million m2	3265.72	3667.57	4651.35	6178.86	7894.41	9731.18	11435.5	12986.2
SSP3	NAM	Gas	Floorspace	Million m2	14508.6	15209.2	15349.3	14963.1	14572.1	14317.6	13950.9	13639.5
SSP3	NAM	Oil	Floorspace	Million m2	3472.91	3372.31	3239.7	3064.34	2684.37	2030.07	1606.87	1286.58
SSP3	NAM	No heating	Floorspace	Million m2	721.51	743.187	764.381	783.919	801.956	818.276	832.457	844.953
SSP3	PAO	Biomass	Floorspace	Million m2	293.026	254.97	231.103	209.039	188.837	170.362	153.394	137.693
SSP3	PAO	Coal	Floorspace	Million m2	201.478	190.844	182.352	173.574	164.597	155.465	146.205	136.841
SSP3	PAO	District heating	Floorspace	Million m2	301.546	326.609	344.024	359.218	372.588	384.485	395.006	404.116
SSP3	PAO	Electricity	Floorspace	Million m2	873.326	965.284	1093.08	1232.6	1379.07	1532.93	1692.82	1857.74
SSP3	PAO	Gas	Floorspace	Million m2	2431.15	2618.27	2723.28	2802.17	2864.09	2912.75	2949.5	2973.79
SSP3	PAO	Oil	Floorspace	Million m2	2577.7	2441.58	2332.79	2220.19	2104.65	1986.41	1865.68	1742.36
SSP3	PAO	No heating	Floorspace	Million m2	0.00037	0.28118	0.56989	0.86221	1.1571	1.45672	1.75856	2.05807
SSP3	PAS	Biomass	Floorspace	Million m2	1314.94	1211.75	1091.54	960.982	826.469	693.751	569.555	455.962
SSP3	PAS	Coal	Floorspace	Million m2	0	0	0	0	0	0	0	0
SSP3	PAS	District heating	Floorspace	Million m2	0	0	0	0	0	0	0	0
SSP3	PAS	Electricity	Floorspace	Million m2	238.038	397.036	569.595	744.875	914.731	1071.74	1213.3	1328.67
SSP3	PAS	Gas	Floorspace	Million m2	0	0	0	0	0	0	0	0
SSP3	PAS	Oil	Floorspace	Million m2	0	0	0	0	0	0	0	0
SSP3	PAS	No heating	Floorspace	Million m2	7811.28	8435.01	9076.48	9682.51	10265.4	10808.7	11296.6	11715
SSP3	SAS	Biomass	Floorspace	Million m2	2142.47	2200.64	2227.8	2220.06	2181.04	2111.94	2014.17	1892.87
SSP3	SAS	Coal	Floorspace	Million m2	0	0	0	0	0	0	0	0
SSP3	SAS	District heating	Floorspace	Million m2	0	0	0	0	0	0	0	0
SSP3	SAS	Electricity	Floorspace	Million m2	486.511	796.888	1176.39	1584.26	2020.75	2475.11	2936.54	3391.29
SSP3	SAS	Gas	Floorspace	Million m2	0	0	0	0	0	0	0	0
SSP3	SAS	Oil	Floorspace	Million m2	0	0	0	0	0	0	0	0
SSP3	SAS	No heating	Floorspace	Million m2	18812.9	20937.8	23189.6	25350	27469.4	29513.4	31456	33258.3
SSP3	WEU	Biomass	Floorspace	Million m2	2416.9	2045.28	1820	1589.67	1357.07	1130.23	928.504	741.167
SSP3	WEU	Coal	Floorspace	Million m2	896.04	840.768	794.08	741.349	679.876	610.568	532.439	450.432
SSP3	WEU	District heating	Floorspace	Million m2	1055	1139.13	1197.73	1244.44	1281.09	1307.83	1323.96	1333.22
SSP3	WEU	Electricity	Floorspace	Million m2	2698.62	4285.03	5455.76	6114.48	6957.84	7881.54	8932.45	10043.3
SSP3	WEU	Gas	Floorspace	Million m2	9360.22	8929.41	8762.91	8984.49	9081.81	9148.6	9119.38	9067.27
SSP3	WEU	Oil	Floorspace	Million m2	3834.49	3400.55	3051.2	2831.65	2561.39	2260.89	1960.02	1689.15
SSP3	WEU	No heating	Floorspace	Million m2	5.47562	5.84944	6.08216	6.33214	6.62057	6.94696	7.28801	7.62112

## Sheet: en_heat_by_cohort
Scenario	Region	Variable	Unit	Cohort	2015	2020	2025	2030	2035	2040	2045	2050
SSP1	AFR	Final Energy|Space Heating	EJ/yr	Slum	0.00883	0.01253	0.01626	0.01977	0.02256	0.02421	0.02453	0.0236
SSP1	AFR	Final Energy|Space Heating	EJ/yr	Existing <1945	0.00645	0.00663	0.00678	0.00666	0.00647	0.00622	0.00582	0.00526
SSP1	AFR	Final Energy|Space Heating	EJ/yr	Existing 1946-1990	0.04088	0.04154	0.04165	0.03965	0.03666	0.0328	0.02774	0.02172
SSP1	AFR	Final Energy|Space Heating	EJ/yr	Existing 1991-2015	0.06567	0.07298	0.0795	0.08264	0.08312	0.08122	0.07634	0.06844
SSP1	AFR	Final Energy|Space Heating	EJ/yr	New - standard	0	0.01091	0.02608	0.04397	0.06433	0.08599	0.10741	0.12739
SSP1	AFR	Final Energy|Space Heating	EJ/yr	New - advanced	0	0	0	5e-05	0.00012	0.00021	0.00035	0.00052
SSP1	AFR	Final Energy|Space Heating	EJ/yr	Renovated - standard	0	0.00545	0.00803	0.01098	0.01327	0.01466	0.01611	0.01808
SSP1	AFR	Final Energy|Space Heating	EJ/yr	Renovated - advanced	0	0	0	0	0	0	0	0
SSP1	CPA	Final Energy|Space Heating	EJ/yr	Slum	0.44841	0.38249	0.27362	0.17114	0.09187	0.04039	0.03039	0.00274
SSP1	CPA	Final Energy|Space Heating	EJ/yr	Existing <1945	0.97976	0.87523	0.44645	0.33842	0.28829	0.24867	0.2137	0.18539
SSP1	CPA	Final Energy|Space Heating	EJ/yr	Existing 1946-1990	1.10818	0.72976	0.28518	0.07251	0.00574	0.00075	0.00031	0.00015
SSP1	CPA	Final Energy|Space Heating	EJ/yr	Existing 1991-2015	1.92356	1.78038	1.31776	0.97191	0.6039	0.27176	0.06112	0.0139
SSP1	CPA	Final Energy|Space Heating	EJ/yr	New - standard	0	0.3045	0.6362	0.84625	0.99045	1.07788	1.11494	1.10965
SSP1	CPA	Final Energy|Space Heating	EJ/yr	New - advanced	0	0.00011	0.00409	0.02424	0.04297	0.05888	0.07125	0.07994
SSP1	CPA	Final Energy|Space Heating	EJ/yr	Renovated - standard	0	0.34924	1.04169	1.15234	1.19058	1.21523	1.22601	1.22754
SSP1	CPA	Final Energy|Space Heating	EJ/yr	Renovated - advanced	0	0.00012	0.00114	0.00151	0.00181	0.00203	0.00208	0.00209
SSP1	EEU	Final Energy|Space Heating	EJ/yr	Existing <1945	0.72782	0.65054	0.53089	0.48808	0.44608	0.40602	0.36579	0.32144
SSP1	EEU	Final Energy|Space Heating	EJ/yr	Existing 1946-1990	0.39617	0.33878	0.23008	0.18566	0.14293	0.09908	0.05633	0.02275
SSP1	EEU	Final Energy|Space Heating	EJ/yr	Existing 1991-2015	0.236	0.22783	0.19701	0.18374	0.16986	0.15455	0.13612	0.11306
SSP1	EEU	Final Energy|Space Heating	EJ/yr	New - standard	0	0	0	0	0	0	0	0
SSP1	EEU	Final Energy|Space Heating	EJ/yr	New - advanced	0	0.01197	0.02316	0.03477	0.04661	0.05848	0.06986	0.08027
SSP1	EEU	Final Energy|Space Heating	EJ/yr	Renovated - standard	0	0.01687	0.05576	0.06454	0.06954	0.07242	0.07429	0.07608
SSP1	EEU	Final Energy|Space Heating	EJ/yr	Renovated - advanced	0	0.02673	0.07238	0.08022	0.08518	0.08837	0.09068	0.0929
SSP1	FSU	Final Energy|Space Heating	EJ/yr	Existing <1945	1.21382	0.95948	0.76222	0.67353	0.57886	0.49626	0.45563	0.42717
SSP1	FSU	Final Energy|Space Heating	EJ/yr	Existing 1946-1990	1.78212	1.5261	1.23907	1.03858	0.86718	0.71153	0.5807	0.45868
SSP1	FSU	Final Energy|Space Heating	EJ/yr	Existing 1991-2015	1.02721	0.9983	0.93641	0.89927	0.84184	0.76173	0.66898	0.58098
SSP1	FSU	Final Energy|Space Heating	EJ/yr	New - standard	0	0.14386	0.26564	0.35784	0.45158	0.54335	0.62736	0.69918
SSP1	FSU	Final Energy|Space Heating	EJ/yr	New - advanced	0	0.00211	0.01086	0.03823	0.07001	0.1049	0.1414	0.17745
SSP1	FSU	Final Energy|Space Heating	EJ/yr	Renovated - standard	0	0.08289	0.16732	0.21033	0.24531	0.2722	0.28943	0.30055
SSP1	FSU	Final Energy|Space Heating	EJ/yr	Renovated - advanced	0	0.16681	0.33481	0.39568	0.4419	0.47909	0.50695	0.5281
SSP1	LAC	Final Energy|Space Heating	EJ/yr	Slum	0.01927	0.02584	0.03053	0.03252	0.03155	0.02792	0.02242	0.01613
SSP1	LAC	Final Energy|Space Heating	EJ/yr	Existing <1945	0.01723	0.01146	0.00922	0.00709	0.00491	0.0029	0.00159	0.00099
SSP1	LAC	Final Energy|Space Heating	EJ/yr	Existing 1946-1990	0.07993	0.07084	0.0677	0.0593	0.04837	0.03558	0.02405	0.01511
SSP1	LAC	Final Energy|Space Heating	EJ/yr	Existing 1991-2015	0.11072	0.11153	0.1184	0.11756	0.10938	0.0949	0.0778	0.05906
SSP1	LAC	Final Energy|Space Heating	EJ/yr	New - standard	0	0.02419	0.05688	0.0923	0.13044	0.16772	0.2013	0.22908
SSP1	LAC	Final Energy|Space Heating	EJ/yr	New - advanced	0	0	0	0.00046	0.00114	0.00201	0.003	0.004
SSP1	LAC	Final Energy|Space Heating	EJ/yr	Renovated - standard	0	0.03477	0.05182	0.06984	0.08764	0.10481	0.11913	0.13001
SSP1	LAC	Final Energy|Space Heating	EJ/yr	Renovated - advanced	0	0	0	0	0	0	0	0
SSP1	MEA	Final Energy|Space Heating	EJ/yr	Slum	0.03477	0.04632	0.0557	0.06271	0.06677	0.06755	0.06493	0.05937
SSP1	MEA	Final Energy|Space Heating	EJ/yr	Existing <1945	0.02426	0.02106	0.0172	0.01215	0.00776	0.00499	0.00399	0.00341
SSP1	MEA	Final Energy|Space Heating	EJ/yr	Existing 1946-1990	0.11024	0.10445	0.09157	0.06735	0.04396	0.02673	0.01738	0.01295
SSP1	MEA	Final Energy|Space Heating	EJ/yr	Existing 1991-2015	0.14395	0.15696	0.1645	0.15673	0.13082	0.09594	0.06573	0.04517
SSP1	MEA	Final Energy|Space Heating	EJ/yr	New - standard	0	0.04212	0.09428	0.14722	0.19963	0.24734	0.29053	0.32711
SSP1	MEA	Final Energy|Space Heating	EJ/yr	New - advanced	0	0	0	0.00101	0.00285	0.00548	0.00837	0.01127
SSP1	MEA	Final Energy|Space Heating	EJ/yr	Renovated - standard	0	0.03974	0.07999	0.12753	0.17899	0.22392	0.25562	0.27508
SSP1	MEA	Final Energy|Space Heating	EJ/yr	Renovated - advanced	0	0	0	0	0	0	0	0
SSP1	NAM	Final Energy|Space Heating	EJ/yr	Existing <1945	2.08225	1.75892	1.24735	0.67238	0.35866	0.19426	0.13167	0.11077
SSP1	NAM	Final Energy|Space Heating	EJ/yr	Existing 1946-1990	2.10925	1.84688	1.38227	0.80834	0.43433	0.24112	0.17664	0.11727
SSP1	NAM	Final Energy|Space Heating	EJ/yr	Existing 1991-2015	1.96188	1.73187	1.28389	0.72437	0.40642	0.26488	0.20759	0.16879
SSP1	NAM	Final Energy|Space Heating	EJ/yr	New - standard	0	0.1068	0.15392	0.17634	0.19492	0.21037	0.22505	0.23896
SSP1	NAM	Final Energy|Space Heating	EJ/yr	New - advanced	0	0.02394	0.05438	0.08723	0.11769	0.14577	0.17224	0.19718
SSP1	NAM	Final Energy|Space Heating	EJ/yr	Renovated - standard	0	0.10852	0.32053	0.57045	0.66209	0.67748	0.66509	0.64956
SSP1	NAM	Final Energy|Space Heating	EJ/yr	Renovated - advanced	0	0.10235	0.31021	0.56153	0.64896	0.66178	0.65394	0.64485
SSP1	PAO	Final Energy|Space Heating	EJ/yr	Existing <1945	0.2088	0.16369	0.14213	0.12304	0.1046	0.08671	0.07061	0.05606
SSP1	PAO	Final Energy|Space Heating	EJ/yr	Existing 1946-1990	0.19897	0.17076	0.15485	0.13981	0.12365	0.10638	0.08936	0.07274
SSP1	PAO	Final Energy|Space Heating	EJ/yr	Existing 1991-2015	0.13402	0.11872	0.1122	0.10593	0.09875	0.08979	0.0795	0.068
SSP1	PAO	Final Energy|Space Heating	EJ/yr	New - standard	0	0.00993	0.01635	0.02101	0.02488	0.02808	0.03085	0.03318
SSP1	PAO	Final Energy|Space Heating	EJ/yr	New - advanced	0	0	1e-05	0.00025	0.00048	0.00067	0.00085	0.001
SSP1	PAO	Final Energy|Space Heating	EJ/yr	Renovated - standard	0	0.01721	0.0192	0.02012	0.02154	0.02361	0.02576	0.02796
SSP1	PAO	Final Energy|Space Heating	EJ/yr	Renovated - advanced	0	0.0034	0.00382	0.00408	0.00453	0.00511	0.00561	0.00604
SSP1	PAS	Final Energy|Space Heating	EJ/yr	Slum	0.00798	0.00611	0.00428	0.00268	0.00144	0.00061	0.00067	2e-05
SSP1	PAS	Final Energy|Space Heating	EJ/yr	Existing <1945	0.02224	0.02291	0.02389	0.02474	0.02533	0.02565	0.02573	0.02557
SSP1	PAS	Final Energy|Space Heating	EJ/yr	Existing 1946-1990	0.09434	0.08228	0.06909	0.05483	0.04064	0.02752	0.01753	0.00932
SSP1	PAS	Final Energy|Space Heating	EJ/yr	Existing 1991-2015	0.26671	0.27062	0.26511	0.24886	0.22309	0.1907	0.15504	0.1191
SSP1	PAS	Final Energy|Space Heating	EJ/yr	New - standard	0	0.02145	0.03588	0.03855	0.03952	0.03888	0.03693	0.03401
SSP1	PAS	Final Energy|Space Heating	EJ/yr	New - advanced	0	3e-05	0.00077	0.00226	0.00365	0.00485	0.00581	0.00651
SSP1	PAS	Final Energy|Space Heating	EJ/yr	Renovated - standard	0	0.00983	0.01365	0.01552	0.01681	0.01785	0.01873	0.01946
SSP1	PAS	Final Energy|Space Heating	EJ/yr	Renovated - advanced	0	0	0	0	0	0	0	0
SSP1	SAS	Final Energy|Space Heating	EJ/yr	Slum	0.01054	0.01897	0.0284	0.03812	0.04678	0.05307	0.05617	0.05603
SSP1	SAS	Final Energy|Space Heating	EJ/yr	Existing <1945	0.03442	0.04149	0.04804	0.04948	0.04464	0.03993	0.03678	0.03154
SSP1	SAS	Final Energy|Space Heating	EJ/yr	Existing 1946-1990	0.07832	0.09298	0.10396	0.10107	0.08339	0.06996	0.05783	0.04383
SSP1	SAS	Final Energy|Space Heating	EJ/yr	Existing 1991-2015	0.14261	0.18109	0.21678	0.23755	0.23493	0.21793	0.19814	0.16327
SSP1	SAS	Final Energy|Space Heating	EJ/yr	New - standard	0	0.00552	0.01235	0.01716	0.02204	0.02668	0.03064	0.03376
SSP1	SAS	Final Energy|Space Heating	EJ/yr	New - advanced	0	0.00033	0.00111	0.00225	0.00355	0.00492	0.00626	0.00749
SSP1	SAS	Final Energy|Space Heating	EJ/yr	Renovated - standard	0	0.00687	0.0104	0.01373	0.01722	0.02122	0.02571	0.03049
SSP1	SAS	Final Energy|Space Heating	EJ/yr	Renovated - advanced	0	0.0004	0.00048	0.00157	0.004	0.00572	0.00655	0.00763
SSP1	WEU	Final Energy|Space Heating	EJ/yr	Existing <1945	4.01716	3.20936	2.02247	1.12878	0.74618	0.55263	0.43067	0.36069
SSP1	WEU	Final Energy|Space Heating	EJ/yr	Existing 1946-1990	2.25724	1.80144	1.14654	0.6402	0.34993	0.20342	0.15102	0.11282
SSP1	WEU	Final Energy|Space Heating	EJ/yr	Existing 1991-2015	1.52872	1.38996	1.18863	1.03146	0.88812	0.7185	0.53676	0.37102
SSP1	WEU	Final Energy|Space Heating	EJ/yr	New - standard	0	0	0	0	0	0	0	0
SSP1	WEU	Final Energy|Space Heating	EJ/yr	New - advanced	0	0.04758	0.09001	0.13529	0.17879	0.22069	0.25985	0.29575
SSP1	WEU	Final Energy|Space Heating	EJ/yr	Renovated - standard	0	0.07154	0.23417	0.38501	0.42354	0.43976	0.44962	0.4529
SSP1	WEU	Final Energy|Space Heating	EJ/yr	Renovated - advanced	0	0.08334	0.25467	0.38417	0.41695	0.42938	0.43543	0.4361
SSP2	AFR	Final Energy|Space Heating	EJ/yr	Slum	0.00884	0.01186	0.015	0.01826	0.02139	0.02408	0.02606	0.02716
SSP2	AFR	Final Energy|Space Heating	EJ/yr	Existing <1945	0.00646	0.00622	0.00611	0.00587	0.00547	0.00491	0.00442	0.004
SSP2	AFR	Final Energy|Space Heating	EJ/yr	Existing 1946-1990	0.04091	0.03959	0.03862	0.03613	0.03193	0.02611	0.02072	0.01576
SSP2	AFR	Final Energy|Space Heating	EJ/yr	Existing 1991-2015	0.06571	0.06888	0.07235	0.07372	0.07205	0.06652	0.05989	0.0526
SSP2	AFR	Final Energy|Space Heating	EJ/yr	New - standard	0	0.00972	0.02198	0.03628	0.05262	0.07056	0.08946	0.10866
SSP2	AFR	Final Energy|Space Heating	EJ/yr	New - advanced	0	0	0	0	0	1e-05	1e-05	1e-05
SSP2	AFR	Final Energy|Space Heating	EJ/yr	Renovated - standard	0	0.00522	0.00677	0.00838	0.01118	0.01568	0.01946	0.02231
SSP2	AFR	Final Energy|Space Heating	EJ/yr	Renovated - advanced	0	0	0	0	0	0	0	0
SSP2	CPA	Final Energy|Space Heating	EJ/yr	Slum	0.44657	0.45369	0.42639	0.38579	0.33617	0.28196	0.22643	0.17155
SSP2	CPA	Final Energy|Space Heating	EJ/yr	Existing <1945	0.9757	0.83016	0.65513	0.42589	0.3606	0.3375	0.31164	0.2832
SSP2	CPA	Final Energy|Space Heating	EJ/yr	Existing 1946-1990	1.10359	0.71164	0.36238	0.11504	0.00805	0.00092	0.00034	0.00016
SSP2	CPA	Final Energy|Space Heating	EJ/yr	Existing 1991-2015	1.9156	1.7407	1.45383	1.04957	0.71778	0.39924	0.11257	0.01526
SSP2	CPA	Final Energy|Space Heating	EJ/yr	New - standard	0	0.25509	0.56699	0.85624	1.11581	1.32276	1.46529	1.54206
SSP2	CPA	Final Energy|Space Heating	EJ/yr	New - advanced	0	2e-05	0.00126	0.00803	0.01615	0.02482	0.03317	0.04047
SSP2	CPA	Final Energy|Space Heating	EJ/yr	Renovated - standard	0	0.37058	0.76691	1.16515	1.29465	1.36643	1.42306	1.4651
SSP2	CPA	Final Energy|Space Heating	EJ/yr	Renovated - advanced	0	0	0	0	0	0	0	0
SSP2	EEU	Final Energy|Space Heating	EJ/yr	Existing <1945	0.72555	0.64318	0.57216	0.51858	0.47004	0.42297	0.37853	0.33797
SSP2	EEU	Final Energy|Space Heating	EJ/yr	Existing 1946-1990	0.39491	0.33242	0.26388	0.20924	0.16148	0.11612	0.07364	0.03763
SSP2	EEU	Final Energy|Space Heating	EJ/yr	Existing 1991-2015	0.2352	0.22798	0.21767	0.20606	0.19197	0.1735	0.15047	0.12569
SSP2	EEU	Final Energy|Space Heating	EJ/yr	New - standard	0	0.00117	0.00232	0.00361	0.00489	0.00615	0.00733	0.0084
SSP2	EEU	Final Energy|Space Heating	EJ/yr	New - advanced	0	0.01139	0.02181	0.03254	0.04352	0.05473	0.06573	0.07616
SSP2	EEU	Final Energy|Space Heating	EJ/yr	Renovated - standard	0	0.04435	0.08984	0.11364	0.12802	0.13934	0.14751	0.15274
SSP2	EEU	Final Energy|Space Heating	EJ/yr	Renovated - advanced	0	0.0115	0.01996	0.02304	0.02502	0.02663	0.02783	0.02867
SSP2	FSU	Final Energy|Space Heating	EJ/yr	Existing <1945	1.20651	0.93012	0.79425	0.68375	0.60661	0.54423	0.49677	0.45177
SSP2	FSU	Final Energy|Space Heating	EJ/yr	Existing 1946-1990	1.7723	1.46476	1.25673	1.04554	0.86792	0.70382	0.56206	0.44469
SSP2	FSU	Final Energy|Space Heating	EJ/yr	Existing 1991-2015	1.02109	0.99714	0.99921	0.97071	0.91251	0.82527	0.72027	0.60519
SSP2	FSU	Final Energy|Space Heating	EJ/yr	New - standard	0	0.14212	0.26438	0.36735	0.47495	0.58436	0.68828	0.78156
SSP2	FSU	Final Energy|Space Heating	EJ/yr	New - advanced	0	0.00066	0.00453	0.02062	0.03917	0.05966	0.08224	0.10584
SSP2	FSU	Final Energy|Space Heating	EJ/yr	Renovated - standard	0	0.23096	0.33457	0.41701	0.48549	0.54849	0.60219	0.64379
SSP2	FSU	Final Energy|Space Heating	EJ/yr	Renovated - advanced	0	0.0939	0.14474	0.18302	0.20871	0.22944	0.24563	0.25833
SSP2	LAC	Final Energy|Space Heating	EJ/yr	Slum	0.01923	0.02304	0.02613	0.02824	0.02916	0.02874	0.02701	0.02415
SSP2	LAC	Final Energy|Space Heating	EJ/yr	Existing <1945	0.0172	0.01121	0.0091	0.00675	0.00512	0.00359	0.00219	0.00117
SSP2	LAC	Final Energy|Space Heating	EJ/yr	Existing 1946-1990	0.07975	0.06679	0.06266	0.05539	0.04682	0.03774	0.02792	0.01893
SSP2	LAC	Final Energy|Space Heating	EJ/yr	Existing 1991-2015	0.11044	0.10421	0.10721	0.1064	0.10199	0.09398	0.08148	0.06596
SSP2	LAC	Final Energy|Space Heating	EJ/yr	New - standard	0	0.02401	0.05143	0.0824	0.11643	0.15184	0.18682	0.21982
SSP2	LAC	Final Energy|Space Heating	EJ/yr	New - advanced	0	0	0	4e-05	0.0001	0.00021	0.00037	0.00057
SSP2	LAC	Final Energy|Space Heating	EJ/yr	Renovated - standard	0	0.03366	0.04547	0.05786	0.06926	0.08005	0.09182	0.10372
SSP2	LAC	Final Energy|Space Heating	EJ/yr	Renovated - advanced	0	0	0	0	0	0	0	0
SSP2	MEA	Final Energy|Space Heating	EJ/yr	Slum	0.03469	0.04359	0.05094	0.05705	0.06158	0.06419	0.06447	0.0624
SSP2	MEA	Final Energy|Space Heating	EJ/yr	Existing <1945	0.02422	0.01984	0.01755	0.0143	0.00997	0.00637	0.00434	0.0034
SSP2	MEA	Final Energy|Space Heating	EJ/yr	Existing 1946-1990	0.11002	0.09712	0.0895	0.07567	0.05368	0.03314	0.02045	0.01351
SSP2	MEA	Final Energy|Space Heating	EJ/yr	Existing 1991-2015	0.14367	0.14363	0.14986	0.15029	0.13871	0.11259	0.083	0.05724
SSP2	MEA	Final Energy|Space Heating	EJ/yr	New - standard	0	0.03729	0.07859	0.12514	0.17719	0.23294	0.289	0.34175
SSP2	MEA	Final Energy|Space Heating	EJ/yr	New - advanced	0	0	0	7e-05	0.00022	0.00047	0.0009	0.00148
SSP2	MEA	Final Energy|Space Heating	EJ/yr	Renovated - standard	0	0.04147	0.06232	0.08619	0.12057	0.16143	0.19464	0.21842
SSP2	MEA	Final Energy|Space Heating	EJ/yr	Renovated - advanced	0	0	0	0	0	0	0	0
SSP2	NAM	Final Energy|Space Heating	EJ/yr	Existing <1945	2.08225	1.75276	1.41378	0.99336	0.60054	0.28433	0.14205	0.11543
SSP2	NAM	Final Energy|Space Heating	EJ/yr	Existing 1946-1990	2.10925	1.86809	1.58997	1.18469	0.76854	0.37214	0.1743	0.11636
SSP2	NAM	Final Energy|Space Heating	EJ/yr	Existing 1991-2015	1.96188	1.75407	1.53943	1.20369	0.8388	0.44196	0.25295	0.17793
SSP2	NAM	Final Energy|Space Heating	EJ/yr	New - standard	0	0.21022	0.26063	0.28298	0.30579	0.32898	0.35071	0.37098
SSP2	NAM	Final Energy|Space Heating	EJ/yr	New - advanced	0	0.01678	0.04627	0.07633	0.10714	0.13889	0.17002	0.20053
SSP2	NAM	Final Energy|Space Heating	EJ/yr	Renovated - standard	0	0.27803	0.468	0.68177	0.88827	1.08419	1.13017	1.11633
SSP2	NAM	Final Energy|Space Heating	EJ/yr	Renovated - advanced	0	0.04806	0.08979	0.13854	0.18228	0.2159	0.22146	0.22013
SSP2	PAO	Final Energy|Space Heating	EJ/yr	Existing <1945	0.20822	0.16846	0.15007	0.1322	0.11397	0.09527	0.07767	0.06137
SSP2	PAO	Final Energy|Space Heating	EJ/yr	Existing 1946-1990	0.1984	0.17562	0.16364	0.15087	0.13614	0.11917	0.10144	0.08353
SSP2	PAO	Final Energy|Space Heating	EJ/yr	Existing 1991-2015	0.13364	0.1221	0.11848	0.11475	0.11005	0.10375	0.09594	0.08651
SSP2	PAO	Final Energy|Space Heating	EJ/yr	New - standard	0	0.01023	0.01727	0.02317	0.02843	0.03317	0.03745	0.04129
SSP2	PAO	Final Energy|Space Heating	EJ/yr	New - advanced	0	0	1e-05	0.00012	0.00024	0.00036	0.00048	0.00058
SSP2	PAO	Final Energy|Space Heating	EJ/yr	Renovated - standard	0	0.02484	0.02854	0.03123	0.03457	0.03885	0.04325	0.04762
SSP2	PAO	Final Energy|Space Heating	EJ/yr	Renovated - advanced	0	0.00035	0.00041	0.00049	0.0006	0.00073	0.00086	0.00097
SSP2	PAS	Final Energy|Space Heating	EJ/yr	Slum	0.00798	0.00583	0.00395	0.00242	0.00129	0.00055	0.0006	2e-05
SSP2	PAS	Final Energy|Space Heating	EJ/yr	Existing <1945	0.02224	0.02209	0.02222	0.02232	0.02244	0.02256	0.0225	0.02218
SSP2	PAS	Final Energy|Space Heating	EJ/yr	Existing 1946-1990	0.09434	0.07935	0.06455	0.04992	0.03646	0.02456	0.01553	0.00809
SSP2	PAS	Final Energy|Space Heating	EJ/yr	Existing 1991-2015	0.26671	0.26096	0.24768	0.22673	0.20038	0.1704	0.13829	0.1059
SSP2	PAS	Final Energy|Space Heating	EJ/yr	New - standard	0	0.02085	0.04226	0.04612	0.04805	0.04826	0.04714	0.04494
SSP2	PAS	Final Energy|Space Heating	EJ/yr	New - advanced	0	0	0.00013	0.00144	0.00274	0.00393	0.00494	0.00576
SSP2	PAS	Final Energy|Space Heating	EJ/yr	Renovated - standard	0	0.00767	0.01189	0.01473	0.01658	0.01789	0.01914	0.02045
SSP2	PAS	Final Energy|Space Heating	EJ/yr	Renovated - advanced	0	0	0	0	0	0	0	0
SSP2	SAS	Final Energy|Space Heating	EJ/yr	Slum	0.01055	0.01756	0.02549	0.03433	0.0434	0.05179	0.05864	0.06337
SSP2	SAS	Final Energy|Space Heating	EJ/yr	Existing <1945	0.03444	0.0377	0.04086	0.04316	0.04488	0.04604	0.02622	0.00347
SSP2	SAS	Final Energy|Space Heating	EJ/yr	Existing 1946-1990	0.07837	0.08447	0.08853	0.08886	0.08604	0.08044	0.04022	0.00676
SSP2	SAS	Final Energy|Space Heating	EJ/yr	Existing 1991-2015	0.14271	0.1649	0.1849	0.19976	0.209	0.21213	0.14114	0.01865
SSP2	SAS	Final Energy|Space Heating	EJ/yr	New - standard	0	0.00643	0.01354	0.01861	0.02393	0.02937	0.03482	0.04008
SSP2	SAS	Final Energy|Space Heating	EJ/yr	New - advanced	0	0.00017	0.00069	0.00149	0.00243	0.00344	0.00449	0.00552
SSP2	SAS	Final Energy|Space Heating	EJ/yr	Renovated - standard	0	0.00649	0.01022	0.01348	0.01621	0.0186	0.0608	0.12498
SSP2	SAS	Final Energy|Space Heating	EJ/yr	Renovated - advanced	0	0	0	0	0	0	0	0
SSP2	WEU	Final Energy|Space Heating	EJ/yr	Existing <1945	4.00269	3.11177	2.31652	1.27704	0.82242	0.58635	0.44708	0.37473
SSP2	WEU	Final Energy|Space Heating	EJ/yr	Existing 1946-1990	2.24896	1.77977	1.34845	0.84052	0.48454	0.25003	0.1632	0.12173
SSP2	WEU	Final Energy|Space Heating	EJ/yr	Existing 1991-2015	1.5231	1.43145	1.3608	1.24981	1.16947	1.06455	0.9211	0.74091
SSP2	WEU	Final Energy|Space Heating	EJ/yr	New - standard	0	0.0046	0.00898	0.01403	0.0189	0.02361	0.02787	0.03168
SSP2	WEU	Final Energy|Space Heating	EJ/yr	New - advanced	0	0.04817	0.09182	0.13823	0.18442	0.23047	0.27479	0.31664
SSP2	WEU	Final Energy|Space Heating	EJ/yr	Renovated - standard	0	0.17956	0.37669	0.73806	0.84699	0.89048	0.91253	0.93283
SSP2	WEU	Final Energy|Space Heating	EJ/yr	Renovated - advanced	0	0.04	0.07842	0.13365	0.14823	0.15363	0.15653	0.15897
SSP3	AFR	Final Energy|Space Heating	EJ/yr	Slum	0.00884	0.01103	0.01327	0.01572	0.01833	0.021	0.02361	0.02603
SSP3	AFR	Final Energy|Space Heating	EJ/yr	Existing <1945	0.00646	0.00577	0.00536	0.00499	0.00463	0.00431	0.00402	0.00376
SSP3	AFR	Final Energy|Space Heating	EJ/yr	Existing 1946-1990	0.04094	0.03726	0.03474	0.03197	0.02894	0.02567	0.02226	0.01879
SSP3	AFR	Final Energy|Space Heating	EJ/yr	Existing 1991-2015	0.06576	0.06458	0.06434	0.06355	0.06196	0.05947	0.05616	0.05213
SSP3	AFR	Final Energy|Space Heating	EJ/yr	New - standard	0	0.00891	0.01878	0.02928	0.04043	0.05201	0.06383	0.07568
SSP3	AFR	Final Energy|Space Heating	EJ/yr	New - advanced	0	0	0	0	0	0	0	0
SSP3	AFR	Final Energy|Space Heating	EJ/yr	Renovated - standard	0	0.00518	0.00644	0.00699	0.00749	0.00812	0.00885	0.00966
SSP3	AFR	Final Energy|Space Heating	EJ/yr	Renovated - advanced	0	0	0	0	0	0	0	0
SSP3	CPA	Final Energy|Space Heating	EJ/yr	Slum	0.4449	0.43439	0.40478	0.37651	0.35169	0.33131	0.31487	0.30085
SSP3	CPA	Final Energy|Space Heating	EJ/yr	Existing <1945	0.97205	0.81708	0.62984	0.43125	0.37518	0.34444	0.30683	0.28575
SSP3	CPA	Final Energy|Space Heating	EJ/yr	Existing 1946-1990	1.09946	0.71756	0.39776	0.14844	0.01762	0.00079	0.00028	0.00013
SSP3	CPA	Final Energy|Space Heating	EJ/yr	Existing 1991-2015	1.90842	1.63204	1.30575	0.97665	0.67818	0.39751	0.12039	0.02257
SSP3	CPA	Final Energy|Space Heating	EJ/yr	New - standard	0	0.2334	0.49336	0.72657	0.92723	1.08438	1.19397	1.25711
SSP3	CPA	Final Energy|Space Heating	EJ/yr	New - advanced	0	0	0.00038	0.00258	0.00498	0.0072	0.00897	0.01019
SSP3	CPA	Final Energy|Space Heating	EJ/yr	Renovated - standard	0	0.36688	0.73387	0.97742	1.03583	1.07296	1.14188	1.17025
SSP3	CPA	Final Energy|Space Heating	EJ/yr	Renovated - advanced	0	0	0	0	0	0	0	0
SSP3	EEU	Final Energy|Space Heating	EJ/yr	Existing <1945	0.72195	0.63253	0.58654	0.54825	0.51007	0.47065	0.43268	0.39595
SSP3	EEU	Final Energy|Space Heating	EJ/yr	Existing 1946-1990	0.39293	0.32851	0.28346	0.24393	0.20021	0.15325	0.11025	0.07215
SSP3	EEU	Final Energy|Space Heating	EJ/yr	Existing 1991-2015	0.23404	0.21513	0.20578	0.19715	0.18441	0.16685	0.14708	0.12564
SSP3	EEU	Final Energy|Space Heating	EJ/yr	New - standard	0	0.00111	0.00222	0.00355	0.00473	0.0058	0.00683	0.00779
SSP3	EEU	Final Energy|Space Heating	EJ/yr	New - advanced	0	0.01111	0.02084	0.03047	0.03996	0.04926	0.05848	0.06734
SSP3	EEU	Final Energy|Space Heating	EJ/yr	Renovated - standard	0	0.06526	0.08264	0.08569	0.09124	0.09983	0.10713	0.11329
SSP3	EEU	Final Energy|Space Heating	EJ/yr	Renovated - advanced	0	0.00016	0.00017	0.00017	0.00018	0.00019	0.0002	0.0002
SSP3	FSU	Final Energy|Space Heating	EJ/yr	Existing <1945	1.20034	0.99597	0.90456	0.82557	0.75333	0.6871	0.62996	0.58218
SSP3	FSU	Final Energy|Space Heating	EJ/yr	Existing 1946-1990	1.76278	1.50359	1.30963	1.11268	0.91484	0.72634	0.57219	0.43898
SSP3	FSU	Final Energy|Space Heating	EJ/yr	Existing 1991-2015	1.01574	0.95524	0.93949	0.91109	0.8657	0.79906	0.71392	0.61479
SSP3	FSU	Final Energy|Space Heating	EJ/yr	New - standard	0	0.13392	0.24361	0.34388	0.44569	0.5476	0.64514	0.73442
SSP3	FSU	Final Energy|Space Heating	EJ/yr	New - advanced	0	0.00031	0.00158	0.00723	0.01354	0.02038	0.02818	0.03683
SSP3	FSU	Final Energy|Space Heating	EJ/yr	Renovated - standard	0	0.19652	0.25858	0.3134	0.36708	0.41874	0.46723	0.50859
SSP3	FSU	Final Energy|Space Heating	EJ/yr	Renovated - advanced	0	0.00109	0.00165	0.00216	0.00265	0.00306	0.00344	0.00373
SSP3	LAC	Final Energy|Space Heating	EJ/yr	Slum	0.0192	0.02166	0.02387	0.02582	0.02745	0.02868	0.02947	0.02982
SSP3	LAC	Final Energy|Space Heating	EJ/yr	Existing <1945	0.01719	0.01247	0.01	0.0077	0.00575	0.00433	0.00311	0.00199
SSP3	LAC	Final Energy|Space Heating	EJ/yr	Existing 1946-1990	0.07963	0.06668	0.05979	0.05214	0.04374	0.03505	0.02696	0.01937
SSP3	LAC	Final Energy|Space Heating	EJ/yr	Existing 1991-2015	0.11026	0.10128	0.09892	0.09536	0.08982	0.08201	0.07232	0.06121
SSP3	LAC	Final Energy|Space Heating	EJ/yr	New - standard	0	0.02174	0.04327	0.0654	0.08834	0.11156	0.13446	0.15655
SSP3	LAC	Final Energy|Space Heating	EJ/yr	New - advanced	0	0	0	0	0	0	1e-05	1e-05
SSP3	LAC	Final Energy|Space Heating	EJ/yr	Renovated - standard	0	0.02725	0.03557	0.04298	0.05044	0.05818	0.06585	0.07333
SSP3	LAC	Final Energy|Space Heating	EJ/yr	Renovated - advanced	0	0	0	0	0	0	0	0
SSP3	MEA	Final Energy|Space Heating	EJ/yr	Slum	0.03465	0.03988	0.04406	0.04799	0.05175	0.0551	0.05783	0.05974
SSP3	MEA	Final Energy|Space Heating	EJ/yr	Existing <1945	0.02418	0.01873	0.01638	0.01371	0.01035	0.00722	0.00505	0.00362
SSP3	MEA	Final Energy|Space Heating	EJ/yr	Existing 1946-1990	0.10986	0.09042	0.08108	0.06938	0.05329	0.03548	0.02244	0.01394
SSP3	MEA	Final Energy|Space Heating	EJ/yr	Existing 1991-2015	0.14345	0.13206	0.13055	0.1274	0.11923	0.10389	0.0836	0.06181
SSP3	MEA	Final Energy|Space Heating	EJ/yr	New - standard	0	0.03439	0.06707	0.10028	0.13515	0.17166	0.2086	0.24461
SSP3	MEA	Final Energy|Space Heating	EJ/yr	New - advanced	0	0	0	0	0	0	1e-05	2e-05
SSP3	MEA	Final Energy|Space Heating	EJ/yr	Renovated - standard	0	0.03985	0.05098	0.06279	0.0807	0.10402	0.12678	0.14644
SSP3	MEA	Final Energy|Space Heating	EJ/yr	Renovated - advanced	0	0	0	0	0	0	0	0
SSP3	NAM	Final Energy|Space Heating	EJ/yr	Existing <1945	2.08225	1.81519	1.53608	1.2521	0.96583	0.69075	0.47308	0.29977
SSP3	NAM	Final Energy|Space Heating	EJ/yr	Existing 1946-1990	2.10925	1.90572	1.66955	1.40075	1.10431	0.7947	0.53656	0.30976
SSP3	NAM	Final Energy|Space Heating	EJ/yr	Existing 1991-2015	1.96188	1.74075	1.48596	1.2031	0.89762	0.59535	0.39775	0.27101
SSP3	NAM	Final Energy|Space Heating	EJ/yr	New - standard	0	0.1734	0.243	0.28056	0.31889	0.35791	0.39438	0.42845
SSP3	NAM	Final Energy|Space Heating	EJ/yr	New - advanced	0	0.01994	0.04935	0.08173	0.11547	0.15072	0.18611	0.22156
SSP3	NAM	Final Energy|Space Heating	EJ/yr	Renovated - standard	0	0.35744	0.66541	0.9245	1.18398	1.42262	1.54038	1.58852
SSP3	NAM	Final Energy|Space Heating	EJ/yr	Renovated - advanced	0	0.00199	0.00395	0.00551	0.0069	0.0078	0.00804	0.00812
SSP3	PAO	Final Energy|Space Heating	EJ/yr	Existing <1945	0.20778	0.17217	0.1518	0.13458	0.11938	0.10597	0.09415	0.08361
SSP3	PAO	Final Energy|Space Heating	EJ/yr	Existing 1946-1990	0.19803	0.17584	0.16226	0.14981	0.13769	0.12563	0.11356	0.10138
SSP3	PAO	Final Energy|Space Heating	EJ/yr	Existing 1991-2015	0.13337	0.12041	0.11497	0.11007	0.10497	0.09946	0.0934	0.08667
SSP3	PAO	Final Energy|Space Heating	EJ/yr	New - standard	0	0.00999	0.01686	0.02297	0.02844	0.03336	0.03782	0.0418
SSP3	PAO	Final Energy|Space Heating	EJ/yr	New - advanced	0	0	0	1e-05	3e-05	4e-05	8e-05	9e-05
SSP3	PAO	Final Energy|Space Heating	EJ/yr	Renovated - standard	0	0.01951	0.02384	0.02531	0.02621	0.0271	0.02809	0.02941
SSP3	PAO	Final Energy|Space Heating	EJ/yr	Renovated - advanced	0	0	0	0	0	0	0	0
SSP3	PAS	Final Energy|Space Heating	EJ/yr	Slum	0.00798	0.00556	0.00362	0.00215	0.00112	0.00046	0.0005	2e-05
SSP3	PAS	Final Energy|Space Heating	EJ/yr	Existing <1945	0.02224	0.02128	0.02063	0.02022	0.01996	0.0198	0.01971	0.01964
SSP3	PAS	Final Energy|Space Heating	EJ/yr	Existing 1946-1990	0.09434	0.07645	0.0603	0.04598	0.03359	0.02312	0.01525	0.00917
SSP3	PAS	Final Energy|Space Heating	EJ/yr	Existing 1991-2015	0.26671	0.25098	0.23048	0.20627	0.17959	0.15176	0.12403	0.09747
SSP3	PAS	Final Energy|Space Heating	EJ/yr	New - standard	0	0.01993	0.04043	0.06085	0.08036	0.09822	0.11398	0.12735
SSP3	PAS	Final Energy|Space Heating	EJ/yr	New - advanced	0	0	0	0	0	0	0	0
SSP3	PAS	Final Energy|Space Heating	EJ/yr	Renovated - standard	0	0.00507	0.00837	0.01053	0.01197	0.01297	0.0137	0.01427
SSP3	PAS	Final Energy|Space Heating	EJ/yr	Renovated - advanced	0	0	0	0	0	0	0	0
SSP3	SAS	Final Energy|Space Heating	EJ/yr	Slum	0.01055	0.01592	0.02164	0.02807	0.03499	0.04202	0.04876	0.0549
SSP3	SAS	Final Energy|Space Heating	EJ/yr	Existing <1945	0.03446	0.03427	0.03425	0.03419	0.03409	0.03398	0.03382	0.03363
SSP3	SAS	Final Energy|Space Heating	EJ/yr	Existing 1946-1990	0.07843	0.07672	0.07423	0.07048	0.06562	0.05981	0.05322	0.04607
SSP3	SAS	Final Energy|Space Heating	EJ/yr	Existing 1991-2015	0.1428	0.14979	0.15513	0.15808	0.15853	0.15633	0.15143	0.14402
SSP3	SAS	Final Energy|Space Heating	EJ/yr	New - standard	0	0.00785	0.01937	0.03197	0.04597	0.06116	0.07729	0.09406
SSP3	SAS	Final Energy|Space Heating	EJ/yr	New - advanced	0	0	0	0	0	0	0	0
SSP3	SAS	Final Energy|Space Heating	EJ/yr	Renovated - standard	0	0.00432	0.00711	0.00923	0.01094	0.01242	0.01377	0.01505
SSP3	SAS	Final Energy|Space Heating	EJ/yr	Renovated - advanced	0	0	0	0	0	0	0	0
SSP3	WEU	Final Energy|Space Heating	EJ/yr	Existing <1945	3.99288	3.0887	2.30345	1.88301	1.52596	1.21514	0.92561	0.66075
SSP3	WEU	Final Energy|Space Heating	EJ/yr	Existing 1946-1990	2.24334	1.7636	1.33855	1.05325	0.78414	0.52624	0.29482	0.16414
SSP3	WEU	Final Energy|Space Heating	EJ/yr	Existing 1991-2015	1.51931	1.41453	1.32191	1.24619	1.18254	1.10618	1.00724	0.88265
SSP3	WEU	Final Energy|Space Heating	EJ/yr	New - standard	0	0.00417	0.00832	0.01345	0.01849	0.02349	0.02781	0.03154
SSP3	WEU	Final Energy|Space Heating	EJ/yr	New - advanced	0	0.04692	0.09081	0.13907	0.18783	0.23725	0.2855	0.33182
SSP3	WEU	Final Energy|Space Heating	EJ/yr	Renovated - standard	0	0.26059	0.55887	0.71229	0.78619	0.84141	0.89929	0.94502
SSP3	WEU	Final Energy|Space Heating	EJ/yr	Renovated - advanced	0	0.00168	0.00331	0.00374	0.00389	0.00397	0.00409	0.00424

## Sheet: en_heat_by_fuel
Scenario	Region	Fuel_Heating	Variable	Unit	2015	2020	2025	2030	2035	2040	2045	2050
SSP1	AFR	Biomass	Final Energy|Space Heating	EJ/yr	0.06743	0.07471	0.07902	0.07994	0.07885	0.0755	0.06904	0.05959
SSP1	AFR	Coal	Final Energy|Space Heating	EJ/yr	0.01996	0.02256	0.02436	0.02519	0.02504	0.02399	0.02225	0.01996
SSP1	AFR	District heating	Final Energy|Space Heating	EJ/yr	0	0	0	0	0	0	0	0
SSP1	AFR	Electricity	Final Energy|Space Heating	EJ/yr	0.01794	0.01879	0.02331	0.02759	0.03155	0.03513	0.03768	0.03899
SSP1	AFR	Gas	Final Energy|Space Heating	EJ/yr	0	0.0154	0.03166	0.0506	0.07106	0.0917	0.11218	0.13182
SSP1	AFR	Oil	Final Energy|Space Heating	EJ/yr	0.0165	0.01858	0.01995	0.0204	0.02003	0.01899	0.01715	0.01465
SSP1	AFR	No heating	Final Energy|Space Heating	EJ/yr	0	0	0	0	0	0	0	0
SSP1	CPA	Biomass	Final Energy|Space Heating	EJ/yr	1.28092	1.01049	0.48237	0.31308	0.17178	0.06623	0.01829	0.00522
SSP1	CPA	Coal	Final Energy|Space Heating	EJ/yr	1.72774	1.58911	1.27426	0.89316	0.62121	0.40382	0.23815	0.18372
SSP1	CPA	District heating	Final Energy|Space Heating	EJ/yr	0.25348	0.33595	0.38745	0.39323	0.38198	0.36855	0.36031	0.36178
SSP1	CPA	Electricity	Final Energy|Space Heating	EJ/yr	1.19777	0.93691	0.38511	0.2424	0.16458	0.11666	0.10764	0.07923
SSP1	CPA	Gas	Final Energy|Space Heating	EJ/yr	0	0.54912	1.47537	1.73462	1.87416	1.95849	1.99369	1.9899
SSP1	CPA	Oil	Final Energy|Space Heating	EJ/yr	0	0.00025	0.00157	0.00183	0.0019	0.00184	0.00172	0.00155
SSP1	CPA	No heating	Final Energy|Space Heating	EJ/yr	0	0	0	0	0	0	0	0
SSP1	EEU	Biomass	Final Energy|Space Heating	EJ/yr	0.39631	0.37128	0.35122	0.32257	0.28924	0.25279	0.2148	0.17568
SSP1	EEU	Coal	Final Energy|Space Heating	EJ/yr	0.31632	0.28662	0.25978	0.24497	0.22441	0.19943	0.17045	0.13988
SSP1	EEU	District heating	Final Energy|Space Heating	EJ/yr	0.1549	0.16259	0.16673	0.16404	0.15694	0.14624	0.13271	0.11805
SSP1	EEU	Electricity	Final Energy|Space Heating	EJ/yr	0.08584	0.07224	0.04061	0.04422	0.04681	0.04811	0.04902	0.0503
SSP1	EEU	Gas	Final Energy|Space Heating	EJ/yr	0.36096	0.34135	0.26625	0.24028	0.22695	0.22109	0.21791	0.21603
SSP1	EEU	Oil	Final Energy|Space Heating	EJ/yr	0.04566	0.03864	0.02469	0.02093	0.01585	0.01126	0.00818	0.00656
SSP1	EEU	No heating	Final Energy|Space Heating	EJ/yr	0	0	0	0	0	0	0	0
SSP1	FSU	Biomass	Final Energy|Space Heating	EJ/yr	0.47975	0.43735	0.39606	0.31052	0.23043	0.1541	0.10314	0.06669
SSP1	FSU	Coal	Final Energy|Space Heating	EJ/yr	0.17208	0.16293	0.15086	0.12215	0.09514	0.06942	0.05288	0.03984
SSP1	FSU	District heating	Final Energy|Space Heating	EJ/yr	1.63485	1.8524	2.0078	2.1004	2.14979	2.15804	2.12762	2.06469
SSP1	FSU	Electricity	Final Energy|Space Heating	EJ/yr	0.13803	0.07211	0.05876	0.07636	0.09324	0.10755	0.11595	0.12091
SSP1	FSU	Gas	Final Energy|Space Heating	EJ/yr	1.28595	1.11018	0.94286	0.88609	0.85337	0.84085	0.84864	0.86515
SSP1	FSU	Oil	Final Energy|Space Heating	EJ/yr	0.31249	0.24458	0.15999	0.11794	0.07471	0.0391	0.02222	0.01483
SSP1	FSU	No heating	Final Energy|Space Heating	EJ/yr	0	0	0	0	0	0	0	0
SSP1	LAC	Biomass	Final Energy|Space Heating	EJ/yr	0.01316	0.0007	0.00075	0.00079	0.00079	0.00077	0.00072	0.00067
SSP1	LAC	Coal	Final Energy|Space Heating	EJ/yr	0.00107	0.00122	0.00132	0.00132	0.00124	0.0011	0.00089	0.00067
SSP1	LAC	District heating	Final Energy|Space Heating	EJ/yr	0	0	0	0	0	0	0	0
SSP1	LAC	Electricity	Final Energy|Space Heating	EJ/yr	0.04926	0.03605	0.03861	0.04155	0.04233	0.04071	0.03713	0.03252
SSP1	LAC	Gas	Final Energy|Space Heating	EJ/yr	0.03446	0.09447	0.14284	0.19267	0.24234	0.28887	0.32925	0.36172
SSP1	LAC	Oil	Final Energy|Space Heating	EJ/yr	0.1292	0.14619	0.15103	0.14274	0.12673	0.10439	0.0813	0.0588
SSP1	LAC	No heating	Final Energy|Space Heating	EJ/yr	0	0	0	0	0	0	0	0
SSP1	MEA	Biomass	Final Energy|Space Heating	EJ/yr	0.00311	0.00282	0.00156	0.00089	0.00079	0.00072	0.00063	0.00053
SSP1	MEA	Coal	Final Energy|Space Heating	EJ/yr	0.00025	0.00029	0.00033	0.00032	0.00027	0.00023	0.00014	0.0001
SSP1	MEA	District heating	Final Energy|Space Heating	EJ/yr	0	0	0	0	0	0	0	0
SSP1	MEA	Electricity	Final Energy|Space Heating	EJ/yr	0.07076	0.0604	0.06385	0.07176	0.07697	0.07906	0.07799	0.07409
SSP1	MEA	Gas	Final Energy|Space Heating	EJ/yr	0.09851	0.1847	0.27055	0.35953	0.44454	0.5174	0.57868	0.62586
SSP1	MEA	Oil	Final Energy|Space Heating	EJ/yr	0.14059	0.16244	0.16695	0.1422	0.10821	0.07454	0.04911	0.03378
SSP1	MEA	No heating	Final Energy|Space Heating	EJ/yr	0	0	0	0	0	0	0	0
SSP1	NAM	Biomass	Final Energy|Space Heating	EJ/yr	0.6371	0.57515	0.4924	0.39415	0.31224	0.22504	0.14068	0.06581
SSP1	NAM	Coal	Final Energy|Space Heating	EJ/yr	0	0	0	0	0	0	0	0
SSP1	NAM	District heating	Final Energy|Space Heating	EJ/yr	0	0	0	0	0	0	0	0
SSP1	NAM	Electricity	Final Energy|Space Heating	EJ/yr	0.66129	0.59946	0.4514	0.32308	0.35807	0.37234	0.36889	0.36576
SSP1	NAM	Gas	Final Energy|Space Heating	EJ/yr	3.91731	3.65444	3.11866	2.4222	1.91183	1.69082	1.65105	1.63234
SSP1	NAM	Oil	Final Energy|Space Heating	EJ/yr	0.93768	0.85023	0.69009	0.46121	0.24093	0.10746	0.0716	0.06347
SSP1	NAM	No heating	Final Energy|Space Heating	EJ/yr	0	0	0	0	0	0	0	0
SSP1	PAO	Biomass	Final Energy|Space Heating	EJ/yr	0.04701	0.03987	0.03518	0.03094	0.02713	0.0236	0.02021	0.01676
SSP1	PAO	Coal	Final Energy|Space Heating	EJ/yr	0.01657	0.01495	0.01375	0.0126	0.01151	0.01044	0.00934	0.00821
SSP1	PAO	District heating	Final Energy|Space Heating	EJ/yr	0.0125	0.01281	0.01282	0.01268	0.01249	0.0122	0.01186	0.01141
SSP1	PAO	Electricity	Final Energy|Space Heating	EJ/yr	0.05386	0.02363	0.02113	0.02038	0.02072	0.02185	0.02322	0.02471
SSP1	PAO	Gas	Final Energy|Space Heating	EJ/yr	0.1999	0.20129	0.19016	0.17732	0.1613	0.14249	0.12546	0.11094
SSP1	PAO	Oil	Final Energy|Space Heating	EJ/yr	0.21195	0.19116	0.17552	0.16032	0.14528	0.12977	0.11245	0.09295
SSP1	PAO	No heating	Final Energy|Space Heating	EJ/yr	0	0	0	0	0	0	0	0
SSP1	PAS	Biomass	Final Energy|Space Heating	EJ/yr	0.36412	0.36962	0.35579	0.3273	0.28839	0.24346	0.19805	0.15385
SSP1	PAS	Coal	Final Energy|Space Heating	EJ/yr	0	0	0	0	0	0	0	0
SSP1	PAS	District heating	Final Energy|Space Heating	EJ/yr	0	0	0	0	0	0	0	0
SSP1	PAS	Electricity	Final Energy|Space Heating	EJ/yr	0.02715	0.04361	0.05688	0.06014	0.06209	0.0626	0.06239	0.06014
SSP1	PAS	Gas	Final Energy|Space Heating	EJ/yr	0	0	0	0	0	0	0	0
SSP1	PAS	Oil	Final Energy|Space Heating	EJ/yr	0	0	0	0	0	0	0	0
SSP1	PAS	No heating	Final Energy|Space Heating	EJ/yr	0	0	0	0	0	0	0	0
SSP1	SAS	Biomass	Final Energy|Space Heating	EJ/yr	0.24258	0.31065	0.36537	0.38539	0.36073	0.32595	0.29118	0.23732
SSP1	SAS	Coal	Final Energy|Space Heating	EJ/yr	0	0	0	0	0	0	0	0
SSP1	SAS	District heating	Final Energy|Space Heating	EJ/yr	0	0	0	0	0	0	0	0
SSP1	SAS	Electricity	Final Energy|Space Heating	EJ/yr	0.02331	0.037	0.05615	0.07554	0.09582	0.11348	0.1269	0.13672
SSP1	SAS	Gas	Final Energy|Space Heating	EJ/yr	0	0	0	0	0	0	0	0
SSP1	SAS	Oil	Final Energy|Space Heating	EJ/yr	0	0	0	0	0	0	0	0
SSP1	SAS	No heating	Final Energy|Space Heating	EJ/yr	0	0	0	0	0	0	0	0
SSP1	WEU	Biomass	Final Energy|Space Heating	EJ/yr	1.36622	1.03606	0.74329	0.55817	0.37648	0.25979	0.18383	0.12149
SSP1	WEU	Coal	Final Energy|Space Heating	EJ/yr	0.34231	0.29688	0.24337	0.20919	0.15599	0.10537	0.08032	0.06205
SSP1	WEU	District heating	Final Energy|Space Heating	EJ/yr	0.28078	0.27601	0.26734	0.25009	0.20817	0.15199	0.11521	0.10209
SSP1	WEU	Electricity	Final Energy|Space Heating	EJ/yr	0.77319	0.72968	0.61024	0.47904	0.48682	0.49246	0.49858	0.50064
SSP1	WEU	Gas	Final Energy|Space Heating	EJ/yr	3.57578	3.03979	2.22006	1.61921	1.36636	1.24333	1.14337	1.06106
SSP1	WEU	Oil	Final Energy|Space Heating	EJ/yr	1.46484	1.2248	0.85219	0.58921	0.40969	0.31144	0.24204	0.18195
SSP1	WEU	No heating	Final Energy|Space Heating	EJ/yr	0	0	0	0	0	0	0	0
SSP2	AFR	Biomass	Final Energy|Space Heating	EJ/yr	0.06748	0.07113	0.07275	0.07133	0.06657	0.0581	0.05011	0.04241
SSP2	AFR	Coal	Final Energy|Space Heating	EJ/yr	0.01998	0.02113	0.02183	0.02199	0.02162	0.02068	0.01909	0.01688
SSP2	AFR	District heating	Final Energy|Space Heating	EJ/yr	0	0	0	0	0	0	0	0
SSP2	AFR	Electricity	Final Energy|Space Heating	EJ/yr	0.01796	0.01762	0.02141	0.02606	0.03024	0.03353	0.03605	0.038
SSP2	AFR	Gas	Final Energy|Space Heating	EJ/yr	0	0.01052	0.01877	0.02779	0.0402	0.05656	0.07293	0.08866
SSP2	AFR	Oil	Final Energy|Space Heating	EJ/yr	0.0165	0.02109	0.02607	0.03147	0.03601	0.039	0.04184	0.04455
SSP2	AFR	No heating	Final Energy|Space Heating	EJ/yr	0	0	0	0	0	0	0	0
SSP2	CPA	Biomass	Final Energy|Space Heating	EJ/yr	1.27562	1.01012	0.68877	0.33597	0.20893	0.12706	0.04986	0.01348
SSP2	CPA	Coal	Final Energy|Space Heating	EJ/yr	1.72059	1.53062	1.31854	1.03876	0.75394	0.54623	0.35496	0.27443
SSP2	CPA	District heating	Final Energy|Space Heating	EJ/yr	0.25243	0.31391	0.36138	0.39445	0.4098	0.4201	0.42578	0.44825
SSP2	CPA	Electricity	Final Energy|Space Heating	EJ/yr	1.19282	0.96691	0.7001	0.46485	0.38624	0.32827	0.27228	0.21865
SSP2	CPA	Gas	Final Energy|Space Heating	EJ/yr	0	0.48456	0.99797	1.48509	1.69562	1.83237	1.93658	2.00725
SSP2	CPA	Oil	Final Energy|Space Heating	EJ/yr	0	0.05576	0.16613	0.28659	0.39468	0.4796	0.53304	0.55574
SSP2	CPA	No heating	Final Energy|Space Heating	EJ/yr	0	0	0	0	0	0	0	0
SSP2	EEU	Biomass	Final Energy|Space Heating	EJ/yr	0.39511	0.36591	0.34326	0.31378	0.28187	0.24866	0.21493	0.18366
SSP2	EEU	Coal	Final Energy|Space Heating	EJ/yr	0.31531	0.29184	0.27882	0.2636	0.24304	0.21748	0.18892	0.15951
SSP2	EEU	District heating	Final Energy|Space Heating	EJ/yr	0.15437	0.15979	0.16198	0.16059	0.15579	0.14811	0.13793	0.12574
SSP2	EEU	Electricity	Final Energy|Space Heating	EJ/yr	0.08557	0.06273	0.0432	0.04457	0.04982	0.05434	0.05853	0.06162
SSP2	EEU	Gas	Final Energy|Space Heating	EJ/yr	0.35979	0.35384	0.32824	0.29458	0.27054	0.2554	0.24078	0.22983
SSP2	EEU	Oil	Final Energy|Space Heating	EJ/yr	0.04551	0.03788	0.03214	0.02959	0.02388	0.01545	0.00995	0.0069
SSP2	EEU	No heating	Final Energy|Space Heating	EJ/yr	0	0	0	0	0	0	0	0
SSP2	FSU	Biomass	Final Energy|Space Heating	EJ/yr	0.47709	0.43411	0.37982	0.27345	0.21561	0.16837	0.13113	0.09598
SSP2	FSU	Coal	Final Energy|Space Heating	EJ/yr	0.17112	0.15984	0.14979	0.1298	0.10421	0.08069	0.06554	0.05089
SSP2	FSU	District heating	Final Energy|Space Heating	EJ/yr	1.62499	1.78575	1.89647	1.96686	2.01169	2.03208	2.02658	1.99576
SSP2	FSU	Electricity	Final Energy|Space Heating	EJ/yr	0.13725	0.03503	0.05144	0.07271	0.09364	0.11578	0.13628	0.15299
SSP2	FSU	Gas	Final Energy|Space Heating	EJ/yr	1.27872	1.19047	1.11555	1.08054	1.05009	1.02264	0.99426	0.97256
SSP2	FSU	Oil	Final Energy|Space Heating	EJ/yr	0.31073	0.25446	0.20534	0.16464	0.12012	0.07571	0.04365	0.02299
SSP2	FSU	No heating	Final Energy|Space Heating	EJ/yr	0	0	0	0	0	0	0	0
SSP2	LAC	Biomass	Final Energy|Space Heating	EJ/yr	0.01313	0.00073	0.00073	0.00073	0.00072	0.00069	0.00064	0.00059
SSP2	LAC	Coal	Final Energy|Space Heating	EJ/yr	0.00106	0.00113	0.00116	0.00115	0.00109	0.00099	0.00086	0.0007
SSP2	LAC	District heating	Final Energy|Space Heating	EJ/yr	0	0	0	0	0	0	0	0
SSP2	LAC	Electricity	Final Energy|Space Heating	EJ/yr	0.04915	0.03287	0.03346	0.03565	0.03736	0.03802	0.03759	0.03611
SSP2	LAC	Gas	Final Energy|Space Heating	EJ/yr	0.03438	0.08479	0.1147	0.14686	0.17753	0.20613	0.23577	0.26515
SSP2	LAC	Oil	Final Energy|Space Heating	EJ/yr	0.1289	0.1434	0.15195	0.15269	0.15218	0.15032	0.14275	0.13177
SSP2	LAC	No heating	Final Energy|Space Heating	EJ/yr	0	0	0	0	0	0	0	0
SSP2	MEA	Biomass	Final Energy|Space Heating	EJ/yr	0.00311	0.00286	0.00215	0.0013	0.00102	0.00087	0.00075	0.00065
SSP2	MEA	Coal	Final Energy|Space Heating	EJ/yr	0.00025	0.00028	0.00028	0.00029	0.00027	0.00022	0.00018	0.00013
SSP2	MEA	District heating	Final Energy|Space Heating	EJ/yr	0	0	0	0	0	0	0	0
SSP2	MEA	Electricity	Final Energy|Space Heating	EJ/yr	0.0706	0.05359	0.05886	0.06549	0.0707	0.07401	0.0751	0.07391
SSP2	MEA	Gas	Final Energy|Space Heating	EJ/yr	0.09832	0.16323	0.2057	0.25032	0.30817	0.37593	0.43568	0.48548
SSP2	MEA	Oil	Final Energy|Space Heating	EJ/yr	0.14032	0.16298	0.18177	0.19131	0.18176	0.1601	0.14509	0.13803
SSP2	MEA	No heating	Final Energy|Space Heating	EJ/yr	0	0	0	0	0	0	0	0
SSP2	NAM	Biomass	Final Energy|Space Heating	EJ/yr	0.6371	0.5874	0.4977	0.33898	0.23914	0.17567	0.11085	0.06178
SSP2	NAM	Coal	Final Energy|Space Heating	EJ/yr	0	0	0	0	0	0	0	0
SSP2	NAM	District heating	Final Energy|Space Heating	EJ/yr	0	0	0	0	0	0	0	0
SSP2	NAM	Electricity	Final Energy|Space Heating	EJ/yr	0.66129	0.5506	0.52515	0.54764	0.57688	0.63314	0.66365	0.66173
SSP2	NAM	Gas	Final Energy|Space Heating	EJ/yr	3.91731	3.93399	3.5936	2.96223	2.33645	1.80021	1.56101	1.5272
SSP2	NAM	Oil	Final Energy|Space Heating	EJ/yr	0.93768	0.85602	0.79142	0.71251	0.53889	0.25737	0.10615	0.06698
SSP2	NAM	No heating	Final Energy|Space Heating	EJ/yr	0	0	0	0	0	0	0	0
SSP2	PAO	Biomass	Final Energy|Space Heating	EJ/yr	0.04687	0.04087	0.03706	0.03346	0.03004	0.02671	0.0233	0.0196
SSP2	PAO	Coal	Final Energy|Space Heating	EJ/yr	0.01652	0.01532	0.01448	0.01359	0.0127	0.01177	0.01075	0.0096
SSP2	PAO	District heating	Final Energy|Space Heating	EJ/yr	0.01247	0.01311	0.01348	0.0137	0.01381	0.01384	0.01374	0.01349
SSP2	PAO	Electricity	Final Energy|Space Heating	EJ/yr	0.05371	0.02551	0.02356	0.02395	0.02544	0.02776	0.03027	0.0328
SSP2	PAO	Gas	Final Energy|Space Heating	EJ/yr	0.19934	0.2109	0.20506	0.19492	0.18151	0.16591	0.15135	0.13843
SSP2	PAO	Oil	Final Energy|Space Heating	EJ/yr	0.21135	0.19589	0.18478	0.17321	0.1605	0.14531	0.12768	0.10795
SSP2	PAO	No heating	Final Energy|Space Heating	EJ/yr	0	0	0	0	0	0	0	0
SSP2	PAS	Biomass	Final Energy|Space Heating	EJ/yr	0.36412	0.35296	0.32978	0.29656	0.25795	0.2167	0.17578	0.13581
SSP2	PAS	Coal	Final Energy|Space Heating	EJ/yr	0	0	0	0	0	0	0	0
SSP2	PAS	District heating	Final Energy|Space Heating	EJ/yr	0	0	0	0	0	0	0	0
SSP2	PAS	Electricity	Final Energy|Space Heating	EJ/yr	0.02715	0.04379	0.0629	0.06712	0.06999	0.07145	0.07236	0.07153
SSP2	PAS	Gas	Final Energy|Space Heating	EJ/yr	0	0	0	0	0	0	0	0
SSP2	PAS	Oil	Final Energy|Space Heating	EJ/yr	0	0	0	0	0	0	0	0
SSP2	PAS	No heating	Final Energy|Space Heating	EJ/yr	0	0	0	0	0	0	0	0
SSP2	SAS	Biomass	Final Energy|Space Heating	EJ/yr	0.24274	0.28016	0.30964	0.32823	0.33705	0.33625	0.20562	0.02724
SSP2	SAS	Coal	Final Energy|Space Heating	EJ/yr	0	0	0	0	0	0	0	0
SSP2	SAS	District heating	Final Energy|Space Heating	EJ/yr	0	0	0	0	0	0	0	0
SSP2	SAS	Electricity	Final Energy|Space Heating	EJ/yr	0.02333	0.03756	0.05459	0.07146	0.08884	0.10556	0.16071	0.23559
SSP2	SAS	Gas	Final Energy|Space Heating	EJ/yr	0	0	0	0	0	0	0	0
SSP2	SAS	Oil	Final Energy|Space Heating	EJ/yr	0	0	0	0	0	0	0	0
SSP2	SAS	No heating	Final Energy|Space Heating	EJ/yr	0	0	0	0	0	0	0	0
SSP2	WEU	Biomass	Final Energy|Space Heating	EJ/yr	1.36071	1.04258	0.81212	0.52856	0.35327	0.2471	0.19019	0.14709
SSP2	WEU	Coal	Final Energy|Space Heating	EJ/yr	0.34109	0.30252	0.27349	0.24414	0.19455	0.13579	0.09497	0.07879
SSP2	WEU	District heating	Final Energy|Space Heating	EJ/yr	0.27983	0.27602	0.26815	0.25549	0.228	0.18177	0.13368	0.11811
SSP2	WEU	Electricity	Final Energy|Space Heating	EJ/yr	0.77045	0.73522	0.66723	0.52714	0.54771	0.55692	0.56571	0.58189
SSP2	WEU	Gas	Final Energy|Space Heating	EJ/yr	3.56304	3.03251	2.57919	2.09795	1.82567	1.68151	1.58615	1.47789
SSP2	WEU	Oil	Final Energy|Space Heating	EJ/yr	1.45963	1.20647	0.9815	0.73806	0.52577	0.39603	0.3324	0.27372
SSP2	WEU	No heating	Final Energy|Space Heating	EJ/yr	0	0	0	0	0	0	0	0
SSP3	AFR	Biomass	Final Energy|Space Heating	EJ/yr	0.06753	0.06666	0.06522	0.06295	0.05999	0.05642	0.05231	0.0477
SSP3	AFR	Coal	Final Energy|Space Heating	EJ/yr	0.01999	0.01977	0.01935	0.01867	0.01781	0.01675	0.01553	0.01419
SSP3	AFR	District heating	Final Energy|Space Heating	EJ/yr	0	0	0	0	0	0	0	0
SSP3	AFR	Electricity	Final Energy|Space Heating	EJ/yr	0.01796	0.01645	0.0184	0.02119	0.02432	0.02753	0.03068	0.03363
SSP3	AFR	Gas	Final Energy|Space Heating	EJ/yr	0	0.00875	0.01422	0.01939	0.02512	0.03155	0.03811	0.04469
SSP3	AFR	Oil	Final Energy|Space Heating	EJ/yr	0.01652	0.0211	0.02574	0.0303	0.03454	0.03833	0.0421	0.04584
SSP3	AFR	No heating	Final Energy|Space Heating	EJ/yr	0	0	0	0	0	0	0	0
SSP3	CPA	Biomass	Final Energy|Space Heating	EJ/yr	1.27084	1.0735	0.79174	0.43589	0.26725	0.15702	0.0203	0.00451
SSP3	CPA	Coal	Final Energy|Space Heating	EJ/yr	1.71415	1.43155	1.19115	0.94393	0.69418	0.52563	0.38387	0.28908
SSP3	CPA	District heating	Final Energy|Space Heating	EJ/yr	0.25149	0.29179	0.31615	0.32786	0.33026	0.33223	0.33298	0.35028
SSP3	CPA	Electricity	Final Energy|Space Heating	EJ/yr	1.18835	0.88123	0.5847	0.43483	0.39648	0.37068	0.3522	0.33673
SSP3	CPA	Gas	Final Energy|Space Heating	EJ/yr	0	0.45708	0.91205	1.21669	1.32863	1.40741	1.50632	1.55309
SSP3	CPA	Oil	Final Energy|Space Heating	EJ/yr	0	0.0662	0.16995	0.28022	0.37391	0.44562	0.49152	0.51316
SSP3	CPA	No heating	Final Energy|Space Heating	EJ/yr	0	0	0	0	0	0	0	0
SSP3	EEU	Biomass	Final Energy|Space Heating	EJ/yr	0.3931	0.35238	0.32237	0.29229	0.26289	0.23445	0.20656	0.17957
SSP3	EEU	Coal	Final Energy|Space Heating	EJ/yr	0.31375	0.29233	0.27422	0.2547	0.23404	0.2124	0.18959	0.16601
SSP3	EEU	District heating	Final Energy|Space Heating	EJ/yr	0.15363	0.15398	0.15177	0.14803	0.14309	0.13706	0.12982	0.12148
SSP3	EEU	Electricity	Final Energy|Space Heating	EJ/yr	0.08515	0.03721	0.03051	0.03142	0.03378	0.03825	0.04217	0.04551
SSP3	EEU	Gas	Final Energy|Space Heating	EJ/yr	0.358	0.37746	0.36594	0.34886	0.32673	0.29805	0.27384	0.25387
SSP3	EEU	Oil	Final Energy|Space Heating	EJ/yr	0.04529	0.04045	0.03684	0.03391	0.03027	0.02562	0.02067	0.01592
SSP3	EEU	No heating	Final Energy|Space Heating	EJ/yr	0	0	0	0	0	0	0	0
SSP3	FSU	Biomass	Final Energy|Space Heating	EJ/yr	0.4745	0.41416	0.3788	0.34131	0.30039	0.25204	0.21648	0.18039
SSP3	FSU	Coal	Final Energy|Space Heating	EJ/yr	0.1702	0.15184	0.14044	0.12799	0.11412	0.09784	0.0851	0.07177
SSP3	FSU	District heating	Final Energy|Space Heating	EJ/yr	1.61674	1.68535	1.71522	1.72545	1.72528	1.71594	1.69599	1.66518
SSP3	FSU	Electricity	Final Energy|Space Heating	EJ/yr	0.13651	0.03947	0.04674	0.05574	0.0687	0.08521	0.10132	0.11582
SSP3	FSU	Gas	Final Energy|Space Heating	EJ/yr	1.27185	1.22525	1.13696	1.05981	0.98861	0.92367	0.87064	0.82547
SSP3	FSU	Oil	Final Energy|Space Heating	EJ/yr	0.30906	0.27057	0.24094	0.20571	0.16573	0.12758	0.09053	0.06089
SSP3	FSU	No heating	Final Energy|Space Heating	EJ/yr	0	0	0	0	0	0	0	0
SSP3	LAC	Biomass	Final Energy|Space Heating	EJ/yr	0.01311	0.01005	0.00877	0.00777	0.0067	0.00562	0.0044	0.00307
SSP3	LAC	Coal	Final Energy|Space Heating	EJ/yr	0.00106	0.00105	0.00102	0.00097	0.00091	0.00082	0.00072	0.0006
SSP3	LAC	District heating	Final Energy|Space Heating	EJ/yr	0	0	0	0	0	0	0	0
SSP3	LAC	Electricity	Final Energy|Space Heating	EJ/yr	0.04907	0.0318	0.03108	0.03235	0.03394	0.03548	0.03663	0.03736
SSP3	LAC	Gas	Final Energy|Space Heating	EJ/yr	0.03433	0.06935	0.08506	0.09982	0.11551	0.13207	0.14812	0.16336
SSP3	LAC	Oil	Final Energy|Space Heating	EJ/yr	0.12871	0.13883	0.14549	0.14849	0.14848	0.14582	0.14231	0.13789
SSP3	LAC	No heating	Final Energy|Space Heating	EJ/yr	0	0	0	0	0	0	0	0
SSP3	MEA	Biomass	Final Energy|Space Heating	EJ/yr	0.00311	0.00276	0.00262	0.00247	0.00196	0.00111	0.00058	0.00042
SSP3	MEA	Coal	Final Energy|Space Heating	EJ/yr	0.00025	0.00026	0.00025	0.00024	0.00023	0.00019	0.00016	0.00013
SSP3	MEA	District heating	Final Energy|Space Heating	EJ/yr	0	0	0	0	0	0	0	0
SSP3	MEA	Electricity	Final Energy|Space Heating	EJ/yr	0.07051	0.04901	0.0511	0.05482	0.05883	0.06264	0.06586	0.06829
SSP3	MEA	Gas	Final Energy|Space Heating	EJ/yr	0.09816	0.14668	0.16722	0.18882	0.21789	0.25379	0.28994	0.32343
SSP3	MEA	Oil	Final Energy|Space Heating	EJ/yr	0.14011	0.15662	0.16893	0.1752	0.17156	0.15964	0.14777	0.13791
SSP3	MEA	No heating	Final Energy|Space Heating	EJ/yr	0	0	0	0	0	0	0	0
SSP3	NAM	Biomass	Final Energy|Space Heating	EJ/yr	0.6371	0.6042	0.56567	0.5196	0.46284	0.39166	0.30663	0.21725
SSP3	NAM	Coal	Final Energy|Space Heating	EJ/yr	0	0	0	0	0	0	0	0
SSP3	NAM	District heating	Final Energy|Space Heating	EJ/yr	0	0	0	0	0	0	0	0
SSP3	NAM	Electricity	Final Energy|Space Heating	EJ/yr	0.66129	0.50956	0.44701	0.47108	0.53165	0.61466	0.67736	0.71656
SSP3	NAM	Gas	Final Energy|Space Heating	EJ/yr	3.91731	4.00018	3.79073	3.3756	2.97333	2.6419	2.31913	2.05317
SSP3	NAM	Oil	Final Energy|Space Heating	EJ/yr	0.93768	0.90049	0.84989	0.78197	0.62518	0.37163	0.23318	0.14021
SSP3	NAM	No heating	Final Energy|Space Heating	EJ/yr	0	0	0	0	0	0	0	0
SSP3	PAO	Biomass	Final Energy|Space Heating	EJ/yr	0.04677	0.04007	0.03584	0.03198	0.02849	0.02535	0.02251	0.01991
SSP3	PAO	Coal	Final Energy|Space Heating	EJ/yr	0.01649	0.01503	0.01399	0.01299	0.01202	0.0111	0.01021	0.00933
SSP3	PAO	District heating	Final Energy|Space Heating	EJ/yr	0.01244	0.01288	0.01304	0.01311	0.01309	0.01302	0.01291	0.01273
SSP3	PAO	Electricity	Final Energy|Space Heating	EJ/yr	0.05359	0.03386	0.02861	0.0264	0.02533	0.02504	0.02535	0.02609
SSP3	PAO	Gas	Final Energy|Space Heating	EJ/yr	0.19895	0.20379	0.19924	0.19216	0.18417	0.17557	0.16655	0.15708
SSP3	PAO	Oil	Final Energy|Space Heating	EJ/yr	0.21094	0.19229	0.17901	0.16611	0.15362	0.14148	0.12957	0.11782
SSP3	PAO	No heating	Final Energy|Space Heating	EJ/yr	0	0	0	0	0	0	0	0
SSP3	PAS	Biomass	Final Energy|Space Heating	EJ/yr	0.36412	0.33635	0.30353	0.26749	0.23002	0.19272	0.15775	0.12548
SSP3	PAS	Coal	Final Energy|Space Heating	EJ/yr	0	0	0	0	0	0	0	0
SSP3	PAS	District heating	Final Energy|Space Heating	EJ/yr	0	0	0	0	0	0	0	0
SSP3	PAS	Electricity	Final Energy|Space Heating	EJ/yr	0.02715	0.04292	0.0603	0.07851	0.09657	0.11361	0.12942	0.14244
SSP3	PAS	Gas	Final Energy|Space Heating	EJ/yr	0	0	0	0	0	0	0	0
SSP3	PAS	Oil	Final Energy|Space Heating	EJ/yr	0	0	0	0	0	0	0	0
SSP3	PAS	No heating	Final Energy|Space Heating	EJ/yr	0	0	0	0	0	0	0	0
SSP3	SAS	Biomass	Final Energy|Space Heating	EJ/yr	0.24291	0.25215	0.25733	0.25791	0.25437	0.24692	0.23579	0.22146
SSP3	SAS	Coal	Final Energy|Space Heating	EJ/yr	0	0	0	0	0	0	0	0
SSP3	SAS	District heating	Final Energy|Space Heating	EJ/yr	0	0	0	0	0	0	0	0
SSP3	SAS	Electricity	Final Energy|Space Heating	EJ/yr	0.02333	0.03672	0.0544	0.07411	0.09577	0.1188	0.1425	0.16627
SSP3	SAS	Gas	Final Energy|Space Heating	EJ/yr	0	0	0	0	0	0	0	0
SSP3	SAS	Oil	Final Energy|Space Heating	EJ/yr	0	0	0	0	0	0	0	0
SSP3	SAS	No heating	Final Energy|Space Heating	EJ/yr	0	0	0	0	0	0	0	0
SSP3	WEU	Biomass	Final Energy|Space Heating	EJ/yr	1.35702	1.12164	0.96658	0.80749	0.64625	0.49808	0.3782	0.26846
SSP3	WEU	Coal	Final Energy|Space Heating	EJ/yr	0.34026	0.30777	0.28183	0.25448	0.22278	0.18847	0.15032	0.11117
SSP3	WEU	District heating	Final Energy|Space Heating	EJ/yr	0.27918	0.2742	0.26511	0.25061	0.23119	0.20773	0.18108	0.15334
SSP3	WEU	Electricity	Final Energy|Space Heating	EJ/yr	0.76858	0.74645	0.65397	0.5645	0.56061	0.57167	0.59283	0.61423
SSP3	WEU	Gas	Final Energy|Space Heating	EJ/yr	3.55441	2.95755	2.5146	2.34383	2.13427	1.93542	1.71677	1.54084
SSP3	WEU	Oil	Final Energy|Space Heating	EJ/yr	1.45608	1.17258	0.94313	0.83009	0.69394	0.55231	0.42516	0.33212
SSP3	WEU	No heating	Final Energy|Space Heating	EJ/yr	0	0	0	0	0	0	0	0

## Sheet: en_cool_by_cohort
Scenario	Region	Variable	Unit	Cohort	2015	2020	2025	2030	2035	2040	2045	2050
SSP1	AFR	Final Energy|Space Cooling	EJ/yr	Slum	7e-05	0.00015	0.00022	0.00029	0.00038	0.00047	0.00056	0.00069
SSP1	AFR	Final Energy|Space Cooling	EJ/yr	Existing <1945	0.00074	0.00186	0.00287	0.00386	0.00512	0.00729	0.00995	0.01313
SSP1	AFR	Final Energy|Space Cooling	EJ/yr	Existing 1946-1990	0.00299	0.00794	0.01287	0.01726	0.02122	0.02542	0.02913	0.03203
SSP1	AFR	Final Energy|Space Cooling	EJ/yr	Existing 1991-2015	0.00556	0.01625	0.02907	0.0424	0.05518	0.06793	0.08095	0.09261
SSP1	AFR	Final Energy|Space Cooling	EJ/yr	New - standard	0	0.00437	0.01763	0.04255	0.08206	0.13972	0.2247	0.33391
SSP1	AFR	Final Energy|Space Cooling	EJ/yr	New - advanced	0	0	0	3e-05	6e-05	0.00012	0.00021	0.00032
SSP1	AFR	Final Energy|Space Cooling	EJ/yr	Renovated - standard	0	0.0001	0.0002	0.00031	0.00039	0.00045	0.00049	0.00055
SSP1	AFR	Final Energy|Space Cooling	EJ/yr	Renovated - advanced	0	0	0	0	0	0	0	0
SSP1	CPA	Final Energy|Space Cooling	EJ/yr	Slum	0.00914	0.00881	0.01014	0.01056	0.00849	0.00407	0.00329	6e-05
SSP1	CPA	Final Energy|Space Cooling	EJ/yr	Existing <1945	0.03917	0.03677	0.03054	0.03118	0.03119	0.03078	0.03037	0.0297
SSP1	CPA	Final Energy|Space Cooling	EJ/yr	Existing 1946-1990	0.06712	0.04861	0.02864	0.01575	0.00669	0.00361	0.00211	0.00115
SSP1	CPA	Final Energy|Space Cooling	EJ/yr	Existing 1991-2015	0.21862	0.21655	0.1849	0.1475	0.1086	0.07351	0.04516	0.02669
SSP1	CPA	Final Energy|Space Cooling	EJ/yr	New - standard	0	0.05814	0.12814	0.19327	0.25586	0.3042	0.33971	0.35613
SSP1	CPA	Final Energy|Space Cooling	EJ/yr	New - advanced	0	0	4e-05	0.00225	0.00491	0.00772	0.0104	0.01259
SSP1	CPA	Final Energy|Space Cooling	EJ/yr	Renovated - standard	0	0.01289	0.04426	0.05329	0.05575	0.05881	0.06238	0.06455
SSP1	CPA	Final Energy|Space Cooling	EJ/yr	Renovated - advanced	0	0	0	0	0	0	0	0
SSP1	EEU	Final Energy|Space Cooling	EJ/yr	Existing <1945	0.00103	0.00106	0.00104	0.00107	0.00107	0.00105	0.00099	0.00093
SSP1	EEU	Final Energy|Space Cooling	EJ/yr	Existing 1946-1990	0.00085	0.0008	0.00067	0.00061	0.00052	0.00041	0.0003	0.0002
SSP1	EEU	Final Energy|Space Cooling	EJ/yr	Existing 1991-2015	0.00083	0.00088	0.00085	0.00087	0.00085	0.00081	0.00074	0.00064
SSP1	EEU	Final Energy|Space Cooling	EJ/yr	New - standard	0	0	0	0	0	0	0	0
SSP1	EEU	Final Energy|Space Cooling	EJ/yr	New - advanced	0	0.00037	0.0008	0.00126	0.00177	0.00231	0.00283	0.00327
SSP1	EEU	Final Energy|Space Cooling	EJ/yr	Renovated - standard	0	4e-05	0.00016	0.00022	0.00027	0.00031	0.00034	0.00037
SSP1	EEU	Final Energy|Space Cooling	EJ/yr	Renovated - advanced	0	5e-05	0.00015	0.00019	0.00023	0.00025	0.00027	0.00028
SSP1	FSU	Final Energy|Space Cooling	EJ/yr	Existing <1945	0.00119	0.0014	0.00163	0.00187	0.00201	0.00206	0.00207	0.00205
SSP1	FSU	Final Energy|Space Cooling	EJ/yr	Existing 1946-1990	0.00317	0.00354	0.00373	0.00381	0.00362	0.00314	0.00265	0.00213
SSP1	FSU	Final Energy|Space Cooling	EJ/yr	Existing 1991-2015	0.00276	0.00351	0.00426	0.00499	0.00542	0.00546	0.00517	0.00462
SSP1	FSU	Final Energy|Space Cooling	EJ/yr	New - standard	0	0.00089	0.0022	0.00388	0.00586	0.00798	0.01003	0.01185
SSP1	FSU	Final Energy|Space Cooling	EJ/yr	New - advanced	0	1e-05	6e-05	0.0004	0.0009	0.00153	0.00219	0.00284
SSP1	FSU	Final Energy|Space Cooling	EJ/yr	Renovated - standard	0	0.00014	0.00042	0.00076	0.00123	0.00176	0.00219	0.00255
SSP1	FSU	Final Energy|Space Cooling	EJ/yr	Renovated - advanced	0	0.00014	0.00043	0.00076	0.00119	0.00166	0.00204	0.00232
SSP1	LAC	Final Energy|Space Cooling	EJ/yr	Slum	0.00038	0.0007	0.00117	0.00178	0.00249	0.00312	0.00354	0.00347
SSP1	LAC	Final Energy|Space Cooling	EJ/yr	Existing <1945	0.00659	0.00905	0.01138	0.01312	0.01436	0.01509	0.01481	0.01431
SSP1	LAC	Final Energy|Space Cooling	EJ/yr	Existing 1946-1990	0.03848	0.05613	0.0732	0.08687	0.09506	0.09711	0.09085	0.08194
SSP1	LAC	Final Energy|Space Cooling	EJ/yr	Existing 1991-2015	0.05627	0.08767	0.12142	0.15315	0.17751	0.19108	0.1888	0.1803
SSP1	LAC	Final Energy|Space Cooling	EJ/yr	New - standard	0	0.0153	0.04256	0.08246	0.13342	0.19019	0.24384	0.29824
SSP1	LAC	Final Energy|Space Cooling	EJ/yr	New - advanced	0	0	0	4e-05	0.00013	0.00028	0.00045	0.00068
SSP1	LAC	Final Energy|Space Cooling	EJ/yr	Renovated - standard	0	0.00094	0.00163	0.00229	0.00304	0.00389	0.0047	0.00551
SSP1	LAC	Final Energy|Space Cooling	EJ/yr	Renovated - advanced	0	0	0	0	0	0	0	0
SSP1	MEA	Final Energy|Space Cooling	EJ/yr	Slum	0.01018	0.00952	0.01008	0.01127	0.01446	0.01966	0.02602	0.03014
SSP1	MEA	Final Energy|Space Cooling	EJ/yr	Existing <1945	0.02295	0.02452	0.02679	0.02824	0.02854	0.02905	0.03135	0.03425
SSP1	MEA	Final Energy|Space Cooling	EJ/yr	Existing 1946-1990	0.12601	0.13902	0.1498	0.15347	0.14786	0.13586	0.12378	0.11254
SSP1	MEA	Final Energy|Space Cooling	EJ/yr	Existing 1991-2015	0.21103	0.24652	0.28195	0.31006	0.32599	0.32666	0.31606	0.29766
SSP1	MEA	Final Energy|Space Cooling	EJ/yr	New - standard	0	0.07133	0.1756	0.30262	0.45967	0.63467	0.82911	1.01628
SSP1	MEA	Final Energy|Space Cooling	EJ/yr	New - advanced	0	0	0	0.00057	0.00186	0.00416	0.00705	0.0104
SSP1	MEA	Final Energy|Space Cooling	EJ/yr	Renovated - standard	0	0.00991	0.0202	0.0326	0.05161	0.07359	0.09363	0.1096
SSP1	MEA	Final Energy|Space Cooling	EJ/yr	Renovated - advanced	0	0	0	0	0	0	0	0
SSP1	NAM	Final Energy|Space Cooling	EJ/yr	Existing <1945	0.21671	0.19218	0.16486	0.1367	0.11394	0.09644	0.08292	0.0717
SSP1	NAM	Final Energy|Space Cooling	EJ/yr	Existing 1946-1990	0.23156	0.20866	0.18146	0.1515	0.12507	0.10333	0.08637	0.07062
SSP1	NAM	Final Energy|Space Cooling	EJ/yr	Existing 1991-2015	0.25154	0.23078	0.20502	0.17725	0.15661	0.14096	0.128	0.11582
SSP1	NAM	Final Energy|Space Cooling	EJ/yr	New - standard	0	0.04139	0.0769	0.10272	0.12687	0.14962	0.1715	0.19271
SSP1	NAM	Final Energy|Space Cooling	EJ/yr	New - advanced	0	0.00533	0.01308	0.02504	0.03664	0.04786	0.05819	0.06781
SSP1	NAM	Final Energy|Space Cooling	EJ/yr	Renovated - standard	0	0.0058	0.01742	0.0325	0.0414	0.04555	0.04661	0.04699
SSP1	NAM	Final Energy|Space Cooling	EJ/yr	Renovated - advanced	0	0.00303	0.00929	0.01751	0.02214	0.02332	0.02277	0.02198
SSP1	PAO	Final Energy|Space Cooling	EJ/yr	Existing <1945	0.01278	0.01054	0.00909	0.00792	0.00689	0.00596	0.00517	0.00448
SSP1	PAO	Final Energy|Space Cooling	EJ/yr	Existing 1946-1990	0.02404	0.0215	0.01945	0.01753	0.01569	0.01397	0.01237	0.01087
SSP1	PAO	Final Energy|Space Cooling	EJ/yr	Existing 1991-2015	0.02306	0.02133	0.01996	0.01861	0.01725	0.0159	0.01457	0.01324
SSP1	PAO	Final Energy|Space Cooling	EJ/yr	New - standard	0	0.00382	0.00655	0.00875	0.01068	0.01239	0.01391	0.01524
SSP1	PAO	Final Energy|Space Cooling	EJ/yr	New - advanced	0	0	1e-05	0.00017	0.00032	0.00047	0.0006	0.00072
SSP1	PAO	Final Energy|Space Cooling	EJ/yr	Renovated - standard	0	0.00056	0.00067	0.00073	0.0008	0.00091	0.00107	0.00125
SSP1	PAO	Final Energy|Space Cooling	EJ/yr	Renovated - advanced	0	9e-05	0.0001	0.00011	0.00011	0.00012	0.00014	0.00015
SSP1	PAS	Final Energy|Space Cooling	EJ/yr	Slum	0.00025	0.00021	0.00015	0.0001	6e-05	4e-05	5e-05	6e-05
SSP1	PAS	Final Energy|Space Cooling	EJ/yr	Existing <1945	0.00271	0.00504	0.00764	0.01104	0.01425	0.01706	0.01964	0.02195
SSP1	PAS	Final Energy|Space Cooling	EJ/yr	Existing 1946-1990	0.0166	0.02417	0.02874	0.03022	0.02915	0.02588	0.02168	0.01719
SSP1	PAS	Final Energy|Space Cooling	EJ/yr	Existing 1991-2015	0.04461	0.0749	0.10012	0.11539	0.12416	0.123	0.11431	0.10052
SSP1	PAS	Final Energy|Space Cooling	EJ/yr	New - standard	0	0.01933	0.05509	0.10153	0.16352	0.23289	0.30424	0.37157
SSP1	PAS	Final Energy|Space Cooling	EJ/yr	New - advanced	0	1e-05	0.0002	0.00065	0.00108	0.00149	0.00186	0.00218
SSP1	PAS	Final Energy|Space Cooling	EJ/yr	Renovated - standard	0	0.00035	0.00045	0.00047	0.00048	0.00049	0.00049	0.00049
SSP1	PAS	Final Energy|Space Cooling	EJ/yr	Renovated - advanced	0	0	0	0	0	0	0	0
SSP1	SAS	Final Energy|Space Cooling	EJ/yr	Slum	0.00036	0.00056	0.00066	0.00072	0.00081	0.00101	0.00143	0.00213
SSP1	SAS	Final Energy|Space Cooling	EJ/yr	Existing <1945	0.01475	0.01975	0.02304	0.02602	0.03374	0.04154	0.05035	0.05902
SSP1	SAS	Final Energy|Space Cooling	EJ/yr	Existing 1946-1990	0.06174	0.08665	0.10458	0.11279	0.13246	0.14983	0.16332	0.16823
SSP1	SAS	Final Energy|Space Cooling	EJ/yr	Existing 1991-2015	0.09176	0.14015	0.18319	0.20799	0.25347	0.30127	0.34485	0.37198
SSP1	SAS	Final Energy|Space Cooling	EJ/yr	New - standard	0	0.03533	0.10085	0.174	0.27421	0.41688	0.59599	0.78948
SSP1	SAS	Final Energy|Space Cooling	EJ/yr	New - advanced	0	0	0	0.00011	0.00031	0.00065	0.00136	0.0025
SSP1	SAS	Final Energy|Space Cooling	EJ/yr	Renovated - standard	0	3e-05	7e-05	0.00014	0.00023	0.00038	0.00067	0.00109
SSP1	SAS	Final Energy|Space Cooling	EJ/yr	Renovated - advanced	0	0	0	0	0	0	0	0
SSP1	WEU	Final Energy|Space Cooling	EJ/yr	Existing <1945	0.01536	0.01416	0.01289	0.0118	0.01097	0.01019	0.00921	0.00826
SSP1	WEU	Final Energy|Space Cooling	EJ/yr	Existing 1946-1990	0.01324	0.0127	0.01154	0.01016	0.00875	0.00731	0.00586	0.00446
SSP1	WEU	Final Energy|Space Cooling	EJ/yr	Existing 1991-2015	0.01807	0.01862	0.01892	0.01899	0.01862	0.01769	0.016	0.01404
SSP1	WEU	Final Energy|Space Cooling	EJ/yr	New - standard	0	0	0	0	0	0	0	0
SSP1	WEU	Final Energy|Space Cooling	EJ/yr	New - advanced	0	0.00415	0.00795	0.01223	0.01677	0.02139	0.02555	0.02939
SSP1	WEU	Final Energy|Space Cooling	EJ/yr	Renovated - standard	0	0.00037	0.00133	0.00242	0.00316	0.00379	0.00434	0.00489
SSP1	WEU	Final Energy|Space Cooling	EJ/yr	Renovated - advanced	0	0.00027	0.00085	0.00134	0.00163	0.00185	0.00201	0.00215
SSP2	AFR	Final Energy|Space Cooling	EJ/yr	Slum	7e-05	0.00013	0.00019	0.00026	0.00033	0.00041	0.00048	0.00055
SSP2	AFR	Final Energy|Space Cooling	EJ/yr	Existing <1945	0.00075	0.00142	0.00205	0.00268	0.00326	0.00416	0.00555	0.00696
SSP2	AFR	Final Energy|Space Cooling	EJ/yr	Existing 1946-1990	0.00301	0.00624	0.00931	0.01205	0.01425	0.01622	0.01828	0.01942
SSP2	AFR	Final Energy|Space Cooling	EJ/yr	Existing 1991-2015	0.0056	0.01271	0.02077	0.02908	0.03712	0.04449	0.05213	0.05793
SSP2	AFR	Final Energy|Space Cooling	EJ/yr	New - standard	0	0.0033	0.01208	0.02787	0.05284	0.08741	0.13566	0.19533
SSP2	AFR	Final Energy|Space Cooling	EJ/yr	New - advanced	0	0	0	0	0	0	0	0
SSP2	AFR	Final Energy|Space Cooling	EJ/yr	Renovated - standard	0	0.0001	0.00019	0.00029	0.00041	0.00059	0.0007	0.00078
SSP2	AFR	Final Energy|Space Cooling	EJ/yr	Renovated - advanced	0	0	0	0	0	0	0	0
SSP2	CPA	Final Energy|Space Cooling	EJ/yr	Slum	0.00893	0.01125	0.01372	0.01711	0.02046	0.02211	0.02188	0.0186
SSP2	CPA	Final Energy|Space Cooling	EJ/yr	Existing <1945	0.03928	0.0376	0.03595	0.03195	0.03186	0.03224	0.03302	0.03275
SSP2	CPA	Final Energy|Space Cooling	EJ/yr	Existing 1946-1990	0.0671	0.05001	0.03272	0.01744	0.00715	0.00367	0.00208	0.00118
SSP2	CPA	Final Energy|Space Cooling	EJ/yr	Existing 1991-2015	0.21801	0.22396	0.20564	0.16214	0.11973	0.0812	0.04948	0.02825
SSP2	CPA	Final Energy|Space Cooling	EJ/yr	New - standard	0	0.05879	0.1299	0.1966	0.25774	0.3146	0.37299	0.41642
SSP2	CPA	Final Energy|Space Cooling	EJ/yr	New - advanced	0	0	0	0.00024	0.00058	0.00104	0.00164	0.00231
SSP2	CPA	Final Energy|Space Cooling	EJ/yr	Renovated - standard	0	0.01526	0.03462	0.05544	0.06375	0.06812	0.07333	0.07692
SSP2	CPA	Final Energy|Space Cooling	EJ/yr	Renovated - advanced	0	0	0	0	0	0	0	0
SSP2	EEU	Final Energy|Space Cooling	EJ/yr	Existing <1945	0.00103	0.00104	0.00106	0.00107	0.00106	0.00104	0.00099	0.00094
SSP2	EEU	Final Energy|Space Cooling	EJ/yr	Existing 1946-1990	0.00085	0.0008	0.0007	0.0006	0.00052	0.00042	0.00031	0.00021
SSP2	EEU	Final Energy|Space Cooling	EJ/yr	Existing 1991-2015	0.00082	0.00087	0.00089	0.00088	0.00087	0.00082	0.00076	0.00066
SSP2	EEU	Final Energy|Space Cooling	EJ/yr	New - standard	0	3e-05	3e-05	6e-05	9e-05	0.00011	0.00014	0.00016
SSP2	EEU	Final Energy|Space Cooling	EJ/yr	New - advanced	0	0.00034	0.00072	0.00113	0.00157	0.00205	0.00254	0.00298
SSP2	EEU	Final Energy|Space Cooling	EJ/yr	Renovated - standard	0	9e-05	0.00021	0.0003	0.00037	0.00044	0.00051	0.00056
SSP2	EEU	Final Energy|Space Cooling	EJ/yr	Renovated - advanced	0	2e-05	3e-05	4e-05	4e-05	5e-05	6e-05	6e-05
SSP2	FSU	Final Energy|Space Cooling	EJ/yr	Existing <1945	0.00119	0.00134	0.00158	0.00181	0.002	0.00207	0.00208	0.00201
SSP2	FSU	Final Energy|Space Cooling	EJ/yr	Existing 1946-1990	0.00317	0.00343	0.00371	0.00379	0.00357	0.00307	0.00251	0.002
SSP2	FSU	Final Energy|Space Cooling	EJ/yr	Existing 1991-2015	0.00276	0.00341	0.00414	0.00485	0.00534	0.00543	0.00518	0.00463
SSP2	FSU	Final Energy|Space Cooling	EJ/yr	New - standard	0	0.00086	0.00209	0.00369	0.00563	0.00774	0.00982	0.01175
SSP2	FSU	Final Energy|Space Cooling	EJ/yr	New - advanced	0	0	2e-05	0.00016	0.00037	0.00064	0.00091	0.0012
SSP2	FSU	Final Energy|Space Cooling	EJ/yr	Renovated - standard	0	0.0003	0.00054	0.00093	0.00146	0.00213	0.00288	0.00362
SSP2	FSU	Final Energy|Space Cooling	EJ/yr	Renovated - advanced	0	6e-05	0.00012	0.00019	0.00028	0.00036	0.00043	0.0005
SSP2	LAC	Final Energy|Space Cooling	EJ/yr	Slum	0.00037	0.00061	0.00095	0.00131	0.00178	0.00219	0.00254	0.00273
SSP2	LAC	Final Energy|Space Cooling	EJ/yr	Existing <1945	0.00662	0.00837	0.01003	0.01131	0.01201	0.01217	0.01178	0.01124
SSP2	LAC	Final Energy|Space Cooling	EJ/yr	Existing 1946-1990	0.03865	0.05199	0.06485	0.07489	0.08058	0.08147	0.0764	0.0692
SSP2	LAC	Final Energy|Space Cooling	EJ/yr	Existing 1991-2015	0.05651	0.08135	0.10789	0.1322	0.1511	0.16234	0.16132	0.15522
SSP2	LAC	Final Energy|Space Cooling	EJ/yr	New - standard	0	0.01404	0.03731	0.06975	0.11023	0.15503	0.19584	0.23481
SSP2	LAC	Final Energy|Space Cooling	EJ/yr	New - advanced	0	0	0	0	0	0	1e-05	2e-05
SSP2	LAC	Final Energy|Space Cooling	EJ/yr	Renovated - standard	0	0.00087	0.00145	0.00198	0.0025	0.00301	0.00346	0.00401
SSP2	LAC	Final Energy|Space Cooling	EJ/yr	Renovated - advanced	0	0	0	0	0	0	0	0
SSP2	MEA	Final Energy|Space Cooling	EJ/yr	Slum	0.00997	0.0092	0.00978	0.01089	0.0127	0.01598	0.01965	0.02386
SSP2	MEA	Final Energy|Space Cooling	EJ/yr	Existing <1945	0.02288	0.02291	0.02423	0.02499	0.02508	0.02438	0.02431	0.02477
SSP2	MEA	Final Energy|Space Cooling	EJ/yr	Existing 1946-1990	0.12589	0.13097	0.1373	0.13876	0.13414	0.12279	0.10879	0.09581
SSP2	MEA	Final Energy|Space Cooling	EJ/yr	Existing 1991-2015	0.21088	0.23223	0.25656	0.27621	0.2885	0.28912	0.28018	0.26397
SSP2	MEA	Final Energy|Space Cooling	EJ/yr	New - standard	0	0.06502	0.15005	0.25036	0.36866	0.50233	0.65533	0.811
SSP2	MEA	Final Energy|Space Cooling	EJ/yr	New - advanced	0	0	0	3e-05	9e-05	0.00022	0.00041	0.00068
SSP2	MEA	Final Energy|Space Cooling	EJ/yr	Renovated - standard	0	0.01138	0.01785	0.02532	0.03682	0.05287	0.06843	0.08198
SSP2	MEA	Final Energy|Space Cooling	EJ/yr	Renovated - advanced	0	0	0	0	0	0	0	0
SSP2	NAM	Final Energy|Space Cooling	EJ/yr	Existing <1945	0.21661	0.19571	0.17457	0.15188	0.12993	0.10887	0.09304	0.08149
SSP2	NAM	Final Energy|Space Cooling	EJ/yr	Existing 1946-1990	0.23142	0.21285	0.19258	0.16872	0.14382	0.1179	0.09642	0.07993
SSP2	NAM	Final Energy|Space Cooling	EJ/yr	Existing 1991-2015	0.25136	0.2352	0.21976	0.20106	0.18166	0.16041	0.14446	0.13117
SSP2	NAM	Final Energy|Space Cooling	EJ/yr	New - standard	0	0.0452	0.08377	0.11644	0.14856	0.1801	0.21101	0.24155
SSP2	NAM	Final Energy|Space Cooling	EJ/yr	New - advanced	0	0.00275	0.01036	0.02104	0.03153	0.04186	0.05185	0.06155
SSP2	NAM	Final Energy|Space Cooling	EJ/yr	Renovated - standard	0	0.01059	0.02102	0.03763	0.05482	0.07341	0.08149	0.08378
SSP2	NAM	Final Energy|Space Cooling	EJ/yr	Renovated - advanced	0	0.00042	0.0011	0.00234	0.00353	0.00468	0.00497	0.00491
SSP2	PAO	Final Energy|Space Cooling	EJ/yr	Existing <1945	0.01277	0.01098	0.00985	0.00885	0.00788	0.00701	0.0062	0.00549
SSP2	PAO	Final Energy|Space Cooling	EJ/yr	Existing 1946-1990	0.024	0.02238	0.02097	0.01952	0.018	0.01648	0.01495	0.01343
SSP2	PAO	Final Energy|Space Cooling	EJ/yr	Existing 1991-2015	0.02303	0.02219	0.02148	0.02064	0.01971	0.01865	0.01753	0.01631
SSP2	PAO	Final Energy|Space Cooling	EJ/yr	New - standard	0	0.00396	0.00703	0.00979	0.01238	0.01479	0.01706	0.01915
SSP2	PAO	Final Energy|Space Cooling	EJ/yr	New - advanced	0	0	0	6e-05	0.00012	0.00017	0.00022	0.00027
SSP2	PAO	Final Energy|Space Cooling	EJ/yr	Renovated - standard	0	0.00076	0.00096	0.0011	0.00127	0.00151	0.00182	0.0022
SSP2	PAO	Final Energy|Space Cooling	EJ/yr	Renovated - advanced	0	0	0	1e-05	2e-05	2e-05	2e-05	2e-05
SSP2	PAS	Final Energy|Space Cooling	EJ/yr	Slum	0.00024	0.0002	0.00014	9e-05	6e-05	3e-05	4e-05	3e-05
SSP2	PAS	Final Energy|Space Cooling	EJ/yr	Existing <1945	0.00268	0.0043	0.00609	0.00826	0.01072	0.01268	0.01442	0.01587
SSP2	PAS	Final Energy|Space Cooling	EJ/yr	Existing 1946-1990	0.01668	0.0212	0.02347	0.02377	0.02247	0.01981	0.01658	0.01314
SSP2	PAS	Final Energy|Space Cooling	EJ/yr	Existing 1991-2015	0.04508	0.06594	0.08216	0.09242	0.09665	0.09546	0.08944	0.07919
SSP2	PAS	Final Energy|Space Cooling	EJ/yr	New - standard	0	0.01699	0.04512	0.08212	0.12604	0.17739	0.23185	0.28197
SSP2	PAS	Final Energy|Space Cooling	EJ/yr	New - advanced	0	0	3e-05	0.0004	0.00075	0.00109	0.00138	0.00163
SSP2	PAS	Final Energy|Space Cooling	EJ/yr	Renovated - standard	0	0.00028	0.00041	0.00047	0.0005	0.00052	0.00053	0.00055
SSP2	PAS	Final Energy|Space Cooling	EJ/yr	Renovated - advanced	0	0	0	0	0	0	0	0
SSP2	SAS	Final Energy|Space Cooling	EJ/yr	Slum	0.00035	0.00048	0.00056	0.00062	0.00066	0.00071	0.00088	0.00105
SSP2	SAS	Final Energy|Space Cooling	EJ/yr	Existing <1945	0.01492	0.017	0.01843	0.02041	0.02381	0.02901	0.03414	0.03811
SSP2	SAS	Final Energy|Space Cooling	EJ/yr	Existing 1946-1990	0.06264	0.07575	0.0851	0.09057	0.09724	0.10591	0.1131	0.11431
SSP2	SAS	Final Energy|Space Cooling	EJ/yr	Existing 1991-2015	0.09323	0.12314	0.14971	0.16806	0.18837	0.21312	0.23967	0.25669
SSP2	SAS	Final Energy|Space Cooling	EJ/yr	New - standard	0	0.03171	0.08346	0.14312	0.21227	0.29163	0.40691	0.54461
SSP2	SAS	Final Energy|Space Cooling	EJ/yr	New - advanced	0	0	0	1e-05	3e-05	7e-05	0.00012	0.00022
SSP2	SAS	Final Energy|Space Cooling	EJ/yr	Renovated - standard	0	2e-05	4e-05	7e-05	0.0001	0.00015	0.00047	0.00295
SSP2	SAS	Final Energy|Space Cooling	EJ/yr	Renovated - advanced	0	0	0	0	0	0	0	0
SSP2	WEU	Final Energy|Space Cooling	EJ/yr	Existing <1945	0.01529	0.01434	0.01376	0.01269	0.01187	0.01106	0.01014	0.00928
SSP2	WEU	Final Energy|Space Cooling	EJ/yr	Existing 1946-1990	0.01318	0.01285	0.01227	0.01108	0.00969	0.00811	0.00651	0.00508
SSP2	WEU	Final Energy|Space Cooling	EJ/yr	Existing 1991-2015	0.01801	0.01898	0.01999	0.02049	0.02059	0.02011	0.01877	0.01701
SSP2	WEU	Final Energy|Space Cooling	EJ/yr	New - standard	0	0.0003	0.0006	0.00095	0.00131	0.00168	0.00203	0.00236
SSP2	WEU	Final Energy|Space Cooling	EJ/yr	New - advanced	0	0.00387	0.00754	0.01175	0.01636	0.02116	0.02559	0.03
SSP2	WEU	Final Energy|Space Cooling	EJ/yr	Renovated - standard	0	0.00068	0.00156	0.00327	0.00447	0.00544	0.00623	0.00705
SSP2	WEU	Final Energy|Space Cooling	EJ/yr	Renovated - advanced	0	7e-05	0.00016	0.00027	0.00034	0.00039	0.00042	0.00046
SSP3	AFR	Final Energy|Space Cooling	EJ/yr	Slum	7e-05	0.00012	0.00017	0.00023	0.00028	0.00034	0.00039	0.00044
SSP3	AFR	Final Energy|Space Cooling	EJ/yr	Existing <1945	0.00075	0.00112	0.00148	0.00177	0.0021	0.00242	0.00277	0.00307
SSP3	AFR	Final Energy|Space Cooling	EJ/yr	Existing 1946-1990	0.00303	0.00495	0.00672	0.00816	0.00924	0.00993	0.01033	0.01034
SSP3	AFR	Final Energy|Space Cooling	EJ/yr	Existing 1991-2015	0.00564	0.01005	0.0147	0.01948	0.02359	0.02703	0.02995	0.03206
SSP3	AFR	Final Energy|Space Cooling	EJ/yr	New - standard	0	0.00255	0.0082	0.0179	0.03159	0.04981	0.0733	0.102
SSP3	AFR	Final Energy|Space Cooling	EJ/yr	New - advanced	0	0	0	0	0	0	0	0
SSP3	AFR	Final Energy|Space Cooling	EJ/yr	Renovated - standard	0	0.0001	0.0002	0.00029	0.00036	0.00041	0.00043	0.00046
SSP3	AFR	Final Energy|Space Cooling	EJ/yr	Renovated - advanced	0	0	0	0	0	0	0	0
SSP3	CPA	Final Energy|Space Cooling	EJ/yr	Slum	0.00904	0.01088	0.01344	0.01509	0.01663	0.01715	0.01722	0.01851
SSP3	CPA	Final Energy|Space Cooling	EJ/yr	Existing <1945	0.03908	0.03722	0.03446	0.03145	0.03042	0.02952	0.02731	0.02612
SSP3	CPA	Final Energy|Space Cooling	EJ/yr	Existing 1946-1990	0.067	0.0486	0.03091	0.01714	0.00703	0.00307	0.00165	0.00089
SSP3	CPA	Final Energy|Space Cooling	EJ/yr	Existing 1991-2015	0.21818	0.21611	0.19363	0.15326	0.11343	0.07752	0.04638	0.02734
SSP3	CPA	Final Energy|Space Cooling	EJ/yr	New - standard	0	0.05635	0.12274	0.18142	0.23121	0.27254	0.30383	0.32477
SSP3	CPA	Final Energy|Space Cooling	EJ/yr	New - advanced	0	0	0	2e-05	5e-05	7e-05	0.0001	0.00012
SSP3	CPA	Final Energy|Space Cooling	EJ/yr	Renovated - standard	0	0.01698	0.03742	0.05249	0.05663	0.05884	0.06287	0.06484
SSP3	CPA	Final Energy|Space Cooling	EJ/yr	Renovated - advanced	0	0	0	0	0	0	0	0
SSP3	EEU	Final Energy|Space Cooling	EJ/yr	Existing <1945	0.00103	0.00103	0.00108	0.00108	0.00107	0.00104	0.00099	0.00094
SSP3	EEU	Final Energy|Space Cooling	EJ/yr	Existing 1946-1990	0.00085	0.00079	0.00074	0.00066	0.00057	0.00046	0.00035	0.00027
SSP3	EEU	Final Energy|Space Cooling	EJ/yr	Existing 1991-2015	0.00082	0.00082	0.00085	0.00084	0.00082	0.00076	0.00069	0.0006
SSP3	EEU	Final Energy|Space Cooling	EJ/yr	New - standard	0	3e-05	3e-05	6e-05	8e-05	0.0001	0.00012	0.00014
SSP3	EEU	Final Energy|Space Cooling	EJ/yr	New - advanced	0	0.00033	0.00068	0.00105	0.00142	0.0018	0.00218	0.00253
SSP3	EEU	Final Energy|Space Cooling	EJ/yr	Renovated - standard	0	0.00012	0.00018	0.0002	0.00022	0.00025	0.00028	0.00031
SSP3	EEU	Final Energy|Space Cooling	EJ/yr	Renovated - advanced	0	0	0	0	0	0	0	0
SSP3	FSU	Final Energy|Space Cooling	EJ/yr	Existing <1945	0.00119	0.00131	0.0015	0.0017	0.00184	0.00197	0.002	0.00201
SSP3	FSU	Final Energy|Space Cooling	EJ/yr	Existing 1946-1990	0.00318	0.00336	0.00358	0.00364	0.00351	0.00315	0.00267	0.00211
SSP3	FSU	Final Energy|Space Cooling	EJ/yr	Existing 1991-2015	0.00276	0.00325	0.00382	0.00429	0.00458	0.00467	0.00445	0.00404
SSP3	FSU	Final Energy|Space Cooling	EJ/yr	New - standard	0	0.00083	0.0019	0.00329	0.00487	0.00659	0.00818	0.00962
SSP3	FSU	Final Energy|Space Cooling	EJ/yr	New - advanced	0	0	1e-05	4e-05	0.00011	0.00016	0.00023	0.00029
SSP3	FSU	Final Energy|Space Cooling	EJ/yr	Renovated - standard	0	0.00026	0.00039	0.00056	0.00075	0.00099	0.00126	0.00154
SSP3	FSU	Final Energy|Space Cooling	EJ/yr	Renovated - advanced	0	0	0	0	0	0	0	0
SSP3	LAC	Final Energy|Space Cooling	EJ/yr	Slum	0.00037	0.00057	0.00083	0.0011	0.00138	0.00156	0.0017	0.00172
SSP3	LAC	Final Energy|Space Cooling	EJ/yr	Existing <1945	0.00666	0.0079	0.00906	0.00988	0.01014	0.00991	0.0092	0.00847
SSP3	LAC	Final Energy|Space Cooling	EJ/yr	Existing 1946-1990	0.03854	0.04868	0.05823	0.06525	0.06823	0.06693	0.06119	0.05454
SSP3	LAC	Final Energy|Space Cooling	EJ/yr	Existing 1991-2015	0.0562	0.07601	0.09675	0.11518	0.12805	0.13364	0.13016	0.12362
SSP3	LAC	Final Energy|Space Cooling	EJ/yr	New - standard	0	0.01304	0.0331	0.05997	0.09168	0.12474	0.15339	0.17987
SSP3	LAC	Final Energy|Space Cooling	EJ/yr	New - advanced	0	0	0	0	0	0	0	0
SSP3	LAC	Final Energy|Space Cooling	EJ/yr	Renovated - standard	0	0.00057	0.00101	0.0014	0.00177	0.00212	0.00238	0.00264
SSP3	LAC	Final Energy|Space Cooling	EJ/yr	Renovated - advanced	0	0	0	0	0	0	0	0
SSP3	MEA	Final Energy|Space Cooling	EJ/yr	Slum	0.01003	0.00841	0.0083	0.0089	0.01054	0.01229	0.01381	0.01495
SSP3	MEA	Final Energy|Space Cooling	EJ/yr	Existing <1945	0.02296	0.02176	0.02236	0.02274	0.02253	0.02167	0.02042	0.01946
SSP3	MEA	Final Energy|Space Cooling	EJ/yr	Existing 1946-1990	0.1261	0.12488	0.12696	0.12608	0.12045	0.1099	0.09548	0.0812
SSP3	MEA	Final Energy|Space Cooling	EJ/yr	Existing 1991-2015	0.21112	0.22151	0.23686	0.24955	0.25585	0.2538	0.24171	0.22439
SSP3	MEA	Final Energy|Space Cooling	EJ/yr	New - standard	0	0.06235	0.13813	0.22376	0.31814	0.41771	0.51433	0.60724
SSP3	MEA	Final Energy|Space Cooling	EJ/yr	New - advanced	0	0	0	0	0	0	0	0
SSP3	MEA	Final Energy|Space Cooling	EJ/yr	Renovated - standard	0	0.01185	0.01632	0.02109	0.02778	0.03711	0.04692	0.05639
SSP3	MEA	Final Energy|Space Cooling	EJ/yr	Renovated - advanced	0	0	0	0	0	0	0	0
SSP3	NAM	Final Energy|Space Cooling	EJ/yr	Existing <1945	0.21611	0.20121	0.1859	0.16903	0.15278	0.13603	0.12004	0.10517
SSP3	NAM	Final Energy|Space Cooling	EJ/yr	Existing 1946-1990	0.23094	0.21811	0.20331	0.18554	0.16648	0.14528	0.12347	0.10193
SSP3	NAM	Final Energy|Space Cooling	EJ/yr	Existing 1991-2015	0.251	0.23827	0.22507	0.21112	0.19658	0.18121	0.16766	0.15471
SSP3	NAM	Final Energy|Space Cooling	EJ/yr	New - standard	0	0.04536	0.08764	0.12834	0.16976	0.21178	0.25391	0.29644
SSP3	NAM	Final Energy|Space Cooling	EJ/yr	New - advanced	0	0.00369	0.01099	0.02019	0.02955	0.03912	0.04877	0.05849
SSP3	NAM	Final Energy|Space Cooling	EJ/yr	Renovated - standard	0	0.01359	0.02703	0.04058	0.05455	0.06854	0.0784	0.0852
SSP3	NAM	Final Energy|Space Cooling	EJ/yr	Renovated - advanced	0	0	2e-05	2e-05	2e-05	4e-05	4e-05	4e-05
SSP3	PAO	Final Energy|Space Cooling	EJ/yr	Existing <1945	0.01277	0.01123	0.0101	0.00909	0.00814	0.0073	0.00652	0.00586
SSP3	PAO	Final Energy|Space Cooling	EJ/yr	Existing 1946-1990	0.02401	0.02259	0.0213	0.01995	0.01855	0.01715	0.01577	0.0144
SSP3	PAO	Final Energy|Space Cooling	EJ/yr	Existing 1991-2015	0.02303	0.0223	0.02172	0.021	0.02016	0.01927	0.01825	0.01721
SSP3	PAO	Final Energy|Space Cooling	EJ/yr	New - standard	0	0.00398	0.0071	0.01003	0.0128	0.01543	0.01795	0.02032
SSP3	PAO	Final Energy|Space Cooling	EJ/yr	New - advanced	0	0	0	0	2e-05	2e-05	2e-05	3e-05
SSP3	PAO	Final Energy|Space Cooling	EJ/yr	Renovated - standard	0	0.00055	0.00078	0.00092	0.00102	0.00113	0.00123	0.00135
SSP3	PAO	Final Energy|Space Cooling	EJ/yr	Renovated - advanced	0	0	0	0	0	0	0	0
SSP3	PAS	Final Energy|Space Cooling	EJ/yr	Slum	0.00025	0.0002	0.00014	9e-05	5e-05	3e-05	3e-05	2e-05
SSP3	PAS	Final Energy|Space Cooling	EJ/yr	Existing <1945	0.00277	0.00391	0.00533	0.00698	0.00849	0.00987	0.01081	0.01145
SSP3	PAS	Final Energy|Space Cooling	EJ/yr	Existing 1946-1990	0.01699	0.01957	0.02056	0.01999	0.0182	0.01561	0.01251	0.00965
SSP3	PAS	Final Energy|Space Cooling	EJ/yr	Existing 1991-2015	0.04573	0.0611	0.07236	0.07829	0.07961	0.07626	0.06833	0.05914
SSP3	PAS	Final Energy|Space Cooling	EJ/yr	New - standard	0	0.01573	0.03959	0.06954	0.10498	0.14211	0.1757	0.20818
SSP3	PAS	Final Energy|Space Cooling	EJ/yr	New - advanced	0	0	0	0	0	0	0	0
SSP3	PAS	Final Energy|Space Cooling	EJ/yr	Renovated - standard	0	0.00019	0.00031	0.00038	0.00041	0.00044	0.00045	0.00046
SSP3	PAS	Final Energy|Space Cooling	EJ/yr	Renovated - advanced	0	0	0	0	0	0	0	0
SSP3	SAS	Final Energy|Space Cooling	EJ/yr	Slum	0.00035	0.00045	0.00053	0.00061	0.00069	0.00077	0.00083	0.00088
SSP3	SAS	Final Energy|Space Cooling	EJ/yr	Existing <1945	0.01496	0.01532	0.01537	0.01651	0.01767	0.01938	0.02191	0.02346
SSP3	SAS	Final Energy|Space Cooling	EJ/yr	Existing 1946-1990	0.06358	0.06874	0.07186	0.07331	0.07362	0.07361	0.07461	0.07168
SSP3	SAS	Final Energy|Space Cooling	EJ/yr	Existing 1991-2015	0.0952	0.11202	0.12691	0.13608	0.14374	0.15047	0.15954	0.16131
SSP3	SAS	Final Energy|Space Cooling	EJ/yr	New - standard	0	0.02938	0.07252	0.11722	0.16819	0.2212	0.28201	0.34292
SSP3	SAS	Final Energy|Space Cooling	EJ/yr	New - advanced	0	0	0	0	0	0	0	0
SSP3	SAS	Final Energy|Space Cooling	EJ/yr	Renovated - standard	0	1e-05	2e-05	3e-05	4e-05	6e-05	8e-05	0.0001
SSP3	SAS	Final Energy|Space Cooling	EJ/yr	Renovated - advanced	0	0	0	0	0	0	0	0
SSP3	WEU	Final Energy|Space Cooling	EJ/yr	Existing <1945	0.01524	0.01436	0.0139	0.01354	0.01305	0.01246	0.01152	0.01054
SSP3	WEU	Final Energy|Space Cooling	EJ/yr	Existing 1946-1990	0.01313	0.01279	0.0122	0.01142	0.01031	0.00893	0.00722	0.00565
SSP3	WEU	Final Energy|Space Cooling	EJ/yr	Existing 1991-2015	0.01793	0.01877	0.01954	0.02003	0.02016	0.01979	0.01857	0.01694
SSP3	WEU	Final Energy|Space Cooling	EJ/yr	New - standard	0	0.0003	0.00058	0.00092	0.00127	0.00164	0.00197	0.00227
SSP3	WEU	Final Energy|Space Cooling	EJ/yr	New - advanced	0	0.00384	0.00743	0.01145	0.01587	0.02049	0.02467	0.02867
SSP3	WEU	Final Energy|Space Cooling	EJ/yr	Renovated - standard	0	0.00075	0.00171	0.00245	0.00302	0.00355	0.00413	0.00471
SSP3	WEU	Final Energy|Space Cooling	EJ/yr	Renovated - advanced	0	0	0	0	0	0	0	0

## Sheet: ems_heat_by_cohort
Scenario	Region	Variable	Unit	Cohort	2015	2020	2025	2030	2035	2040	2045	2050
SSP1	AFR	CO2 Emissions|Space Heating	MtCO2/yr	Slum	1.71716	1.96224	2.04554	1.97078	1.79172	1.64226	1.56508	1.46647
SSP1	AFR	CO2 Emissions|Space Heating	MtCO2/yr	Existing <1945	0.27787	0.237485	0.232441	0.217888	0.206179	0.195599	0.182937	0.167856
SSP1	AFR	CO2 Emissions|Space Heating	MtCO2/yr	Existing 1946-1990	1.76236	1.46384	1.41012	1.30409	1.18284	1.04708	0.887807	0.708925
SSP1	AFR	CO2 Emissions|Space Heating	MtCO2/yr	Existing 1991-2015	2.82905	2.62375	2.70223	2.69707	2.63284	2.53797	2.38397	2.16042
SSP1	AFR	CO2 Emissions|Space Heating	MtCO2/yr	New - standard	0	0.703509	1.62619	2.64864	3.75647	4.92676	6.11212	7.22883
SSP1	AFR	CO2 Emissions|Space Heating	MtCO2/yr	New - advanced	0	0	0	0.00367671	0.00766481	0.012485	0.0204053	0.0300778
SSP1	AFR	CO2 Emissions|Space Heating	MtCO2/yr	Renovated - standard	0	0.311775	0.458847	0.625131	0.751443	0.82665	0.907006	1.01737
SSP1	AFR	CO2 Emissions|Space Heating	MtCO2/yr	Renovated - advanced	0	0	0	0	0	0	0	0
SSP1	CPA	CO2 Emissions|Space Heating	MtCO2/yr	Slum	84.4115	64.0855	46.9695	28.7389	13.0802	4.31051	2.14748	0.128756
SSP1	CPA	CO2 Emissions|Space Heating	MtCO2/yr	Existing <1945	71.0685	61.3285	34.8445	27.9665	24.6265	21.891	19.3351	16.9647
SSP1	CPA	CO2 Emissions|Space Heating	MtCO2/yr	Existing 1946-1990	84.8777	53.4652	22.2731	5.16433	0.327804	0.0474614	0.0179134	0.00778553
SSP1	CPA	CO2 Emissions|Space Heating	MtCO2/yr	Existing 1991-2015	163.326	136.142	85.4084	61.4937	39.3362	18.7362	3.98923	0.795009
SSP1	CPA	CO2 Emissions|Space Heating	MtCO2/yr	New - standard	0	16.3885	33.8699	45.5301	52.7469	55.9944	56.3928	55.1035
SSP1	CPA	CO2 Emissions|Space Heating	MtCO2/yr	New - advanced	0	0.00640873	0.325187	1.88801	3.04685	3.58136	3.63417	3.58136
SSP1	CPA	CO2 Emissions|Space Heating	MtCO2/yr	Renovated - standard	0	19.6626	58.804	65.1048	67.1867	68.427	68.8558	68.8159
SSP1	CPA	CO2 Emissions|Space Heating	MtCO2/yr	Renovated - advanced	0	0.00896096	0.0974663	0.13056	0.147268	0.145269	0.125863	0.111602
SSP1	EEU	CO2 Emissions|Space Heating	MtCO2/yr	Existing <1945	33.619	27.5485	19.3422	17.352	15.5338	14.1214	12.8915	11.666
SSP1	EEU	CO2 Emissions|Space Heating	MtCO2/yr	Existing 1946-1990	23.6805	18.7305	11.0026	8.60625	6.58508	4.76153	2.90495	1.2929
SSP1	EEU	CO2 Emissions|Space Heating	MtCO2/yr	Existing 1991-2015	13.4356	12.2264	9.67095	8.75427	7.98043	7.3475	6.59844	5.63515
SSP1	EEU	CO2 Emissions|Space Heating	MtCO2/yr	New - standard	0	0	0	0	0	0	0	0
SSP1	EEU	CO2 Emissions|Space Heating	MtCO2/yr	New - advanced	0	0.659147	1.24118	1.76796	2.12326	2.47653	2.97174	3.52546
SSP1	EEU	CO2 Emissions|Space Heating	MtCO2/yr	Renovated - standard	0	1.15963	4.02492	4.63612	4.54088	4.28738	4.3455	4.54109
SSP1	EEU	CO2 Emissions|Space Heating	MtCO2/yr	Renovated - advanced	0	1.76564	4.93265	5.41158	5.33162	5.14776	5.23531	5.4348
SSP1	FSU	CO2 Emissions|Space Heating	MtCO2/yr	Existing <1945	66.1671	44.1582	30.0121	26.3905	23.2152	21.4691	23.3107	27.8064
SSP1	FSU	CO2 Emissions|Space Heating	MtCO2/yr	Existing 1946-1990	92.3199	66.0361	46.2497	39.4763	35.3295	32.9638	33.3284	34.2059
SSP1	FSU	CO2 Emissions|Space Heating	MtCO2/yr	Existing 1991-2015	53.5354	44.2037	36.5938	34.9334	33.9244	33.7964	36.9094	42.3816
SSP1	FSU	CO2 Emissions|Space Heating	MtCO2/yr	New - standard	0	5.99133	10.4269	14.4202	19.3544	25.8455	36.0726	51.1342
SSP1	FSU	CO2 Emissions|Space Heating	MtCO2/yr	New - advanced	0	0.0873323	0.423976	1.53414	2.98983	4.98209	8.15614	13.0559
SSP1	FSU	CO2 Emissions|Space Heating	MtCO2/yr	Renovated - standard	0	5.67924	11.6003	14.2375	16.0722	17.2116	17.7458	18.0369
SSP1	FSU	CO2 Emissions|Space Heating	MtCO2/yr	Renovated - advanced	0	11.0433	22.2135	25.5069	27.5745	29.0185	30.0355	30.8447
SSP1	LAC	CO2 Emissions|Space Heating	MtCO2/yr	Slum	1.28406	1.60294	1.7014	1.64196	1.50204	1.25638	0.930389	0.637325
SSP1	LAC	CO2 Emissions|Space Heating	MtCO2/yr	Existing <1945	0.980636	0.793674	0.635864	0.484502	0.333049	0.192266	0.100241	0.0587009
SSP1	LAC	CO2 Emissions|Space Heating	MtCO2/yr	Existing 1946-1990	5.15665	4.91702	4.70178	4.10858	3.34539	2.45429	1.64734	1.01861
SSP1	LAC	CO2 Emissions|Space Heating	MtCO2/yr	Existing 1991-2015	7.36588	7.73861	8.22409	8.16323	7.59582	6.58908	5.39742	4.08676
SSP1	LAC	CO2 Emissions|Space Heating	MtCO2/yr	New - standard	0	1.36305	3.19026	5.15554	7.26801	9.3233	11.1539	12.6673
SSP1	LAC	CO2 Emissions|Space Heating	MtCO2/yr	New - advanced	0	0	0	0.0249646	0.060897	0.105768	0.15472	0.203996
SSP1	LAC	CO2 Emissions|Space Heating	MtCO2/yr	Renovated - standard	0	1.9519	2.90698	3.91561	4.91193	5.87229	6.67122	7.27813
SSP1	LAC	CO2 Emissions|Space Heating	MtCO2/yr	Renovated - advanced	0	0	0	0	0	0	0	0
SSP1	MEA	CO2 Emissions|Space Heating	MtCO2/yr	Slum	4.65515	5.30323	5.75197	6.07942	6.20576	6.04931	5.58103	4.89071
SSP1	MEA	CO2 Emissions|Space Heating	MtCO2/yr	Existing <1945	1.77959	1.4163	1.16058	0.812869	0.514774	0.32794	0.260924	0.222525
SSP1	MEA	CO2 Emissions|Space Heating	MtCO2/yr	Existing 1946-1990	8.16981	7.0971	6.18871	4.52858	2.93374	1.77138	1.14206	0.848822
SSP1	MEA	CO2 Emissions|Space Heating	MtCO2/yr	Existing 1991-2015	10.7244	10.7413	11.0524	10.5198	8.7603	6.40004	4.34653	2.96006
SSP1	MEA	CO2 Emissions|Space Heating	MtCO2/yr	New - standard	0	2.41799	5.38962	8.40327	11.3857	14.0975	16.5422	18.6023
SSP1	MEA	CO2 Emissions|Space Heating	MtCO2/yr	New - advanced	0	0	0	0.069323	0.191938	0.363629	0.545686	0.721588
SSP1	MEA	CO2 Emissions|Space Heating	MtCO2/yr	Renovated - standard	0	2.23525	4.49687	7.16669	10.0575	12.582	14.3621	15.4535
SSP1	MEA	CO2 Emissions|Space Heating	MtCO2/yr	Renovated - advanced	0	0	0	0	0	0	0	0
SSP1	NAM	CO2 Emissions|Space Heating	MtCO2/yr	Existing <1945	122.173	99.4041	66.2584	32.087	15.7821	8.52071	6.88548	6.18608
SSP1	NAM	CO2 Emissions|Space Heating	MtCO2/yr	Existing 1946-1990	130.477	109.219	76.3418	39.8639	18.4724	8.40696	6.53778	5.40946
SSP1	NAM	CO2 Emissions|Space Heating	MtCO2/yr	Existing 1991-2015	128.478	108.956	76.4538	39.7037	20.3278	11.8139	8.92383	8.08123
SSP1	NAM	CO2 Emissions|Space Heating	MtCO2/yr	New - standard	0	7.86406	10.6273	11.4936	12.0118	12.3598	12.8445	13.4722
SSP1	NAM	CO2 Emissions|Space Heating	MtCO2/yr	New - advanced	0	1.73868	3.7368	5.67587	7.26762	8.58484	9.84163	11.1205
SSP1	NAM	CO2 Emissions|Space Heating	MtCO2/yr	Renovated - standard	0	8.03443	22.1513	37.1268	41.122	40.0006	38.0051	36.6252
SSP1	NAM	CO2 Emissions|Space Heating	MtCO2/yr	Renovated - advanced	0	7.14143	20.4938	35.3814	39.3149	38.5341	37.1713	36.3052
SSP1	PAO	CO2 Emissions|Space Heating	MtCO2/yr	Existing <1945	13.6101	9.54546	8.2084	7.05942	5.966	4.92106	3.98954	3.14245
SSP1	PAO	CO2 Emissions|Space Heating	MtCO2/yr	Existing 1946-1990	13.6229	10.827	9.64816	8.62241	7.57173	6.49841	5.47458	4.46848
SSP1	PAO	CO2 Emissions|Space Heating	MtCO2/yr	Existing 1991-2015	9.13313	7.46645	6.92985	6.47639	5.99472	5.44012	4.83331	4.14037
SSP1	PAO	CO2 Emissions|Space Heating	MtCO2/yr	New - standard	0	0.658099	1.02053	1.23124	1.37757	1.49741	1.63378	1.76229
SSP1	PAO	CO2 Emissions|Space Heating	MtCO2/yr	New - advanced	0	0	0.000561	0.0151494	0.0265261	0.0353472	0.0445348	0.0525835
SSP1	PAO	CO2 Emissions|Space Heating	MtCO2/yr	Renovated - standard	0	1.20789	1.26854	1.24647	1.26317	1.32951	1.43234	1.5703
SSP1	PAO	CO2 Emissions|Space Heating	MtCO2/yr	Renovated - advanced	0	0.238315	0.251403	0.251554	0.264483	0.287571	0.312575	0.339111
SSP1	PAS	CO2 Emissions|Space Heating	MtCO2/yr	Slum	1.29975	0.941328	0.622524	0.347082	0.15396	0.0558118	0.0595293	0.00185082
SSP1	PAS	CO2 Emissions|Space Heating	MtCO2/yr	Existing <1945	0.180793	0.0400565	0.011636	0.00518032	0.00213834	0.000914948	0.000888498	0.000925412
SSP1	PAS	CO2 Emissions|Space Heating	MtCO2/yr	Existing 1946-1990	0.768776	0.12171	0.0378169	0.0194262	0.00855336	0.00365979	0.001777	0.000925412
SSP1	PAS	CO2 Emissions|Space Heating	MtCO2/yr	Existing 1991-2015	2.17277	0.791887	0.285081	0.121738	0.0609427	0.0329381	0.0195469	0.0111049
SSP1	PAS	CO2 Emissions|Space Heating	MtCO2/yr	New - standard	0	3.30466	5.21873	4.99254	4.22536	3.55732	3.28122	3.14733
SSP1	PAS	CO2 Emissions|Space Heating	MtCO2/yr	New - advanced	0	0.00462191	0.111996	0.292688	0.390247	0.44375	0.516217	0.602443
SSP1	PAS	CO2 Emissions|Space Heating	MtCO2/yr	Renovated - standard	0	1.51444	1.98539	2.00997	1.79727	1.63318	1.66416	1.80085
SSP1	PAS	CO2 Emissions|Space Heating	MtCO2/yr	Renovated - advanced	0	0	0	0	0	0	0	0
SSP1	SAS	CO2 Emissions|Space Heating	MtCO2/yr	Slum	2.34953	3.62144	4.79999	6.05505	7.31151	7.7247	6.92566	5.86675
SSP1	SAS	CO2 Emissions|Space Heating	MtCO2/yr	Existing <1945	0.383414	0.0916337	0.0574646	0.0444757	0.035948	0.0291113	0.0209607	0.0157061
SSP1	SAS	CO2 Emissions|Space Heating	MtCO2/yr	Existing 1946-1990	0.873827	0.25772	0.169014	0.123897	0.0984662	0.0742339	0.0517853	0.0356005
SSP1	SAS	CO2 Emissions|Space Heating	MtCO2/yr	Existing 1991-2015	1.58939	0.587983	0.349858	0.262089	0.214125	0.168846	0.120832	0.0869071
SSP1	SAS	CO2 Emissions|Space Heating	MtCO2/yr	New - standard	0	1.05379	2.08732	2.72573	3.44475	3.88345	3.77786	3.53492
SSP1	SAS	CO2 Emissions|Space Heating	MtCO2/yr	New - advanced	0	0.0629982	0.187605	0.357394	0.554849	0.716139	0.771847	0.784258
SSP1	SAS	CO2 Emissions|Space Heating	MtCO2/yr	Renovated - standard	0	1.31151	1.75774	2.1809	2.69141	3.08871	3.17	3.19253
SSP1	SAS	CO2 Emissions|Space Heating	MtCO2/yr	Renovated - advanced	0	0.0763614	0.0811266	0.249382	0.625182	0.832585	0.807603	0.798917
SSP1	WEU	CO2 Emissions|Space Heating	MtCO2/yr	Existing <1945	196.37	155.582	96.029	50.4997	32.8122	24.644	21.4419	19.4096
SSP1	WEU	CO2 Emissions|Space Heating	MtCO2/yr	Existing 1946-1990	116.712	91.3491	55.7946	29.3334	15.9757	10.9152	8.66999	6.55693
SSP1	WEU	CO2 Emissions|Space Heating	MtCO2/yr	Existing 1991-2015	81.005	72.0333	60.632	52.4786	44.4076	34.7628	24.9529	16.7362
SSP1	WEU	CO2 Emissions|Space Heating	MtCO2/yr	New - standard	0	0	0	0	0	0	0	0
SSP1	WEU	CO2 Emissions|Space Heating	MtCO2/yr	New - advanced	0	2.34321	4.29077	6.38328	8.22305	10.1302	12.5378	14.9329
SSP1	WEU	CO2 Emissions|Space Heating	MtCO2/yr	Renovated - standard	0	3.87839	11.9844	19.427	20.7781	21.8803	24.3327	26.2874
SSP1	WEU	CO2 Emissions|Space Heating	MtCO2/yr	Renovated - advanced	0	4.54891	13.3159	19.8536	21.1227	22.0187	23.7835	25.0874
SSP2	AFR	CO2 Emissions|Space Heating	MtCO2/yr	Slum	2.07716	2.51367	2.7421	2.78902	2.70429	2.5965	2.60337	2.77756
SSP2	AFR	CO2 Emissions|Space Heating	MtCO2/yr	Existing <1945	0.298932	0.233531	0.223543	0.209894	0.192489	0.172252	0.155527	0.141333
SSP2	AFR	CO2 Emissions|Space Heating	MtCO2/yr	Existing 1946-1990	1.89697	1.46211	1.37045	1.26678	1.12217	0.945498	0.765685	0.586168
SSP2	AFR	CO2 Emissions|Space Heating	MtCO2/yr	Existing 1991-2015	3.04661	2.64061	2.61736	2.59424	2.49137	2.31002	2.09345	1.8659
SSP2	AFR	CO2 Emissions|Space Heating	MtCO2/yr	New - standard	0	0.714219	1.59448	2.57703	3.60457	4.67783	5.83332	7.07335
SSP2	AFR	CO2 Emissions|Space Heating	MtCO2/yr	New - advanced	0	0	0	0	0	0.000561	0.000561	0.000561
SSP2	AFR	CO2 Emissions|Space Heating	MtCO2/yr	Renovated - standard	0	0.30531	0.395002	0.489446	0.648296	0.900856	1.11361	1.27744
SSP2	AFR	CO2 Emissions|Space Heating	MtCO2/yr	Renovated - advanced	0	0	0	0	0	0	0	0
SSP2	CPA	CO2 Emissions|Space Heating	MtCO2/yr	Slum	90.7541	78.1416	69.2681	59.2098	45.4484	31.7848	21.0372	13.7734
SSP2	CPA	CO2 Emissions|Space Heating	MtCO2/yr	Existing <1945	73.0145	58.547	47.5474	35.6555	31.7275	29.7197	27.6532	25.5004
SSP2	CPA	CO2 Emissions|Space Heating	MtCO2/yr	Existing 1946-1990	87.3504	51.4098	26.538	9.45863	0.472557	0.0570341	0.0211057	0.0097397
SSP2	CPA	CO2 Emissions|Space Heating	MtCO2/yr	Existing 1991-2015	168.579	131.479	100.107	67.3009	45.214	24.7022	6.76468	0.892929
SSP2	CPA	CO2 Emissions|Space Heating	MtCO2/yr	New - standard	0	14.5609	32.5579	49.7391	64.4965	75.6652	83.5546	87.998
SSP2	CPA	CO2 Emissions|Space Heating	MtCO2/yr	New - advanced	0	0.000955954	0.10031	0.639734	1.1885	1.63303	1.96671	2.23535
SSP2	CPA	CO2 Emissions|Space Heating	MtCO2/yr	Renovated - standard	0	20.8627	43.2289	65.7788	73.0317	76.9699	80.0497	82.3406
SSP2	CPA	CO2 Emissions|Space Heating	MtCO2/yr	Renovated - advanced	0	0	0	0	0	0	0	0
SSP2	EEU	CO2 Emissions|Space Heating	MtCO2/yr	Existing <1945	34.6255	27.7293	22.6943	19.97	17.7533	15.7506	14.1625	12.8738
SSP2	EEU	CO2 Emissions|Space Heating	MtCO2/yr	Existing 1946-1990	24.3067	18.6506	13.6942	10.5829	8.07983	5.87884	3.95884	2.18638
SSP2	EEU	CO2 Emissions|Space Heating	MtCO2/yr	Existing 1991-2015	13.7967	12.4196	11.181	10.3258	9.51507	8.58786	7.56981	6.49582
SSP2	EEU	CO2 Emissions|Space Heating	MtCO2/yr	New - standard	0	0.0684121	0.127756	0.187157	0.231982	0.274017	0.333134	0.401749
SSP2	EEU	CO2 Emissions|Space Heating	MtCO2/yr	New - advanced	0	0.674934	1.21451	1.68536	2.02829	2.37348	2.91835	3.59455
SSP2	EEU	CO2 Emissions|Space Heating	MtCO2/yr	Renovated - standard	0	3.25815	6.50525	7.95087	8.23617	8.30743	8.73466	9.34144
SSP2	EEU	CO2 Emissions|Space Heating	MtCO2/yr	Renovated - advanced	0	0.814303	1.37803	1.53025	1.55198	1.55957	1.62002	1.70403
SSP2	FSU	CO2 Emissions|Space Heating	MtCO2/yr	Existing <1945	65.6941	40.6343	32.5765	28.5255	26.0294	24.7315	25.593	28.7777
SSP2	FSU	CO2 Emissions|Space Heating	MtCO2/yr	Existing 1946-1990	91.6431	60.3199	47.7626	40.3308	34.9007	32.0653	32.0805	33.562
SSP2	FSU	CO2 Emissions|Space Heating	MtCO2/yr	Existing 1991-2015	53.1223	42.8951	40.5548	39.3162	38.0616	37.3127	38.8247	42.8391
SSP2	FSU	CO2 Emissions|Space Heating	MtCO2/yr	New - standard	0	5.8248	10.04	14.1336	19.5576	27.389	39.5044	57.8909
SSP2	FSU	CO2 Emissions|Space Heating	MtCO2/yr	New - advanced	0	0.0264483	0.17128	0.787582	1.6042	2.79061	4.73555	7.88009
SSP2	FSU	CO2 Emissions|Space Heating	MtCO2/yr	Renovated - standard	0	15.3618	21.9034	26.9282	30.9594	34.5465	37.2357	39.1121
SSP2	FSU	CO2 Emissions|Space Heating	MtCO2/yr	Renovated - advanced	0	6.2406	9.41625	11.6606	13.0416	14.084	14.7781	15.2903
SSP2	LAC	CO2 Emissions|Space Heating	MtCO2/yr	Slum	1.30726	1.51257	1.61964	1.67369	1.69616	1.63966	1.49923	1.3806
SSP2	LAC	CO2 Emissions|Space Heating	MtCO2/yr	Existing <1945	0.982156	0.776112	0.629661	0.462987	0.349151	0.243217	0.145441	0.0740854
SSP2	LAC	CO2 Emissions|Space Heating	MtCO2/yr	Existing 1946-1990	5.16	4.63881	4.35497	3.84609	3.24917	2.61854	1.93221	1.30359
SSP2	LAC	CO2 Emissions|Space Heating	MtCO2/yr	Existing 1991-2015	7.36917	7.24231	7.45452	7.39906	7.09891	6.54791	5.67379	4.58824
SSP2	LAC	CO2 Emissions|Space Heating	MtCO2/yr	New - standard	0	1.47309	3.14537	5.02173	7.1052	9.29273	11.436	13.4661
SSP2	LAC	CO2 Emissions|Space Heating	MtCO2/yr	New - advanced	0	0	0	0.00227567	0.00567202	0.0118381	0.0206917	0.0321585
SSP2	LAC	CO2 Emissions|Space Heating	MtCO2/yr	Renovated - standard	0	1.88985	2.55216	3.24683	3.88621	4.49121	5.15078	5.81941
SSP2	LAC	CO2 Emissions|Space Heating	MtCO2/yr	Renovated - advanced	0	0	0	0	0	0	0	0
SSP2	MEA	CO2 Emissions|Space Heating	MtCO2/yr	Slum	4.84841	5.27839	5.52483	5.7853	6.08022	6.33606	6.43361	6.2325
SSP2	MEA	CO2 Emissions|Space Heating	MtCO2/yr	Existing <1945	1.79439	1.32014	1.17855	0.967665	0.668523	0.419456	0.282863	0.221084
SSP2	MEA	CO2 Emissions|Space Heating	MtCO2/yr	Existing 1946-1990	8.23668	6.53416	6.02532	5.12495	3.61823	2.20597	1.35245	0.892202
SSP2	MEA	CO2 Emissions|Space Heating	MtCO2/yr	Existing 1991-2015	10.8127	9.77949	10.0577	10.0947	9.31146	7.5121	5.5009	3.78
SSP2	MEA	CO2 Emissions|Space Heating	MtCO2/yr	New - standard	0	2.37234	4.98126	7.90966	11.1437	14.5677	18.0092	21.2336
SSP2	MEA	CO2 Emissions|Space Heating	MtCO2/yr	New - advanced	0	0	0	0.00483315	0.0153266	0.0323321	0.0622869	0.102291
SSP2	MEA	CO2 Emissions|Space Heating	MtCO2/yr	Renovated - standard	0	2.33492	3.5061	4.84749	6.78018	9.07753	10.9468	12.2858
SSP2	MEA	CO2 Emissions|Space Heating	MtCO2/yr	Renovated - advanced	0	0	0	0	0	0	0	0
SSP2	NAM	CO2 Emissions|Space Heating	MtCO2/yr	Existing <1945	121.765	97.2632	77.0231	54.6675	32.9089	15.2078	7.93836	6.58257
SSP2	NAM	CO2 Emissions|Space Heating	MtCO2/yr	Existing 1946-1990	130.042	108.479	89.3808	65.5579	40.9061	17.6188	7.33068	5.78967
SSP2	NAM	CO2 Emissions|Space Heating	MtCO2/yr	Existing 1991-2015	128.049	108.191	92.3449	71.3312	48.6101	23.9183	12.637	8.59125
SSP2	NAM	CO2 Emissions|Space Heating	MtCO2/yr	New - standard	0	14.3033	17.4984	18.4347	19.1369	19.979	21.2633	22.6908
SSP2	NAM	CO2 Emissions|Space Heating	MtCO2/yr	New - advanced	0	1.19701	3.21559	5.15291	6.87467	8.57366	10.4563	12.4373
SSP2	NAM	CO2 Emissions|Space Heating	MtCO2/yr	Renovated - standard	0	18.871	32.8342	48.5902	60.3083	70.2144	72.8539	72.6614
SSP2	NAM	CO2 Emissions|Space Heating	MtCO2/yr	Renovated - advanced	0	3.16766	6.0224	9.33621	11.7707	13.4131	13.6792	13.6723
SSP2	PAO	CO2 Emissions|Space Heating	MtCO2/yr	Existing <1945	13.5346	9.82358	8.65247	7.56402	6.47187	5.36436	4.33547	3.38978
SSP2	PAO	CO2 Emissions|Space Heating	MtCO2/yr	Existing 1946-1990	13.5536	11.1155	10.1443	9.22869	8.24495	7.17377	6.1064	5.0446
SSP2	PAO	CO2 Emissions|Space Heating	MtCO2/yr	Existing 1991-2015	9.08647	7.68222	7.28921	6.96077	6.6093	6.19982	5.73837	5.19066
SSP2	PAO	CO2 Emissions|Space Heating	MtCO2/yr	New - standard	0	0.675606	1.07666	1.34994	1.54644	1.71872	1.92215	2.14249
SSP2	PAO	CO2 Emissions|Space Heating	MtCO2/yr	New - advanced	0	0	0.000561	0.00720376	0.0132348	0.0181921	0.0242663	0.0297956
SSP2	PAO	CO2 Emissions|Space Heating	MtCO2/yr	Renovated - standard	0	1.7379	1.8993	1.96256	2.04685	2.19669	2.42921	2.72836
SSP2	PAO	CO2 Emissions|Space Heating	MtCO2/yr	Renovated - advanced	0	0.0248303	0.0273464	0.0308207	0.0354839	0.0412353	0.0482937	0.0553111
SSP2	PAS	CO2 Emissions|Space Heating	MtCO2/yr	Slum	1.38491	0.895714	0.52471	0.281272	0.135915	0.0549583	0.0593197	0.0019702
SSP2	PAS	CO2 Emissions|Space Heating	MtCO2/yr	Existing <1945	0.192637	0.0706739	0.0265676	0.0116228	0.00526803	0.00399696	0.00296598	0.0019702
SSP2	PAS	CO2 Emissions|Space Heating	MtCO2/yr	Existing 1946-1990	0.819142	0.231995	0.0690757	0.0278948	0.0147505	0.00899317	0.00494331	0.0029553
SSP2	PAS	CO2 Emissions|Space Heating	MtCO2/yr	Existing 1991-2015	2.31512	1.14768	0.52471	0.240592	0.120111	0.0689476	0.0454784	0.0305381
SSP2	PAS	CO2 Emissions|Space Heating	MtCO2/yr	New - standard	0	3.20337	5.61373	5.36044	5.06257	4.82234	4.66055	4.42704
SSP2	PAS	CO2 Emissions|Space Heating	MtCO2/yr	New - advanced	0	0	0.0172689	0.167369	0.288688	0.392702	0.488399	0.567417
SSP2	PAS	CO2 Emissions|Space Heating	MtCO2/yr	Renovated - standard	0	1.17841	1.57944	1.71204	1.74688	1.78764	1.8923	2.01453
SSP2	PAS	CO2 Emissions|Space Heating	MtCO2/yr	Renovated - advanced	0	0	0	0	0	0	0	0
SSP2	SAS	CO2 Emissions|Space Heating	MtCO2/yr	Slum	2.40666	3.72749	5.17235	6.72612	8.23016	9.51583	10.4099	10.7531
SSP2	SAS	CO2 Emissions|Space Heating	MtCO2/yr	Existing <1945	0.392365	0.154958	0.0933418	0.0685739	0.0568905	0.0459347	0.0390548	0.0322408
SSP2	SAS	CO2 Emissions|Space Heating	MtCO2/yr	Existing 1946-1990	0.894227	0.392703	0.253646	0.190048	0.146019	0.113918	0.0869856	0.0678753
SSP2	SAS	CO2 Emissions|Space Heating	MtCO2/yr	Existing 1991-2015	1.62877	0.919137	0.596576	0.436914	0.341343	0.273771	0.221902	0.178173
SSP2	SAS	CO2 Emissions|Space Heating	MtCO2/yr	New - standard	0	1.36491	2.74749	3.64617	4.53797	5.39641	6.1813	6.80111
SSP2	SAS	CO2 Emissions|Space Heating	MtCO2/yr	New - advanced	0	0.0360862	0.140013	0.291929	0.460813	0.632061	0.797072	0.936679
SSP2	SAS	CO2 Emissions|Space Heating	MtCO2/yr	Renovated - standard	0	1.37764	2.07381	2.64107	3.07398	3.41754	10.7933	21.2076
SSP2	SAS	CO2 Emissions|Space Heating	MtCO2/yr	Renovated - advanced	0	0	0	0	0	0	0	0
SSP2	WEU	CO2 Emissions|Space Heating	MtCO2/yr	Existing <1945	195.46	151.188	113.527	64.4043	41.7225	29.3536	23.3678	20.705
SSP2	WEU	CO2 Emissions|Space Heating	MtCO2/yr	Existing 1946-1990	116.242	90.3012	67.9962	42.316	24.3194	13.3263	9.3846	7.19827
SSP2	WEU	CO2 Emissions|Space Heating	MtCO2/yr	Existing 1991-2015	80.7004	75.0897	71.6432	66.0614	61.6374	55.7554	47.9172	38.0735
SSP2	WEU	CO2 Emissions|Space Heating	MtCO2/yr	New - standard	0	0.235528	0.460888	0.722389	0.945896	1.17706	1.47894	1.78817
SSP2	WEU	CO2 Emissions|Space Heating	MtCO2/yr	New - advanced	0	2.43723	4.65935	7.03432	9.08759	11.3159	14.5037	17.9309
SSP2	WEU	CO2 Emissions|Space Heating	MtCO2/yr	Renovated - standard	0	9.70137	20.2608	39.8109	43.758	46.2362	53.1482	60.3354
SSP2	WEU	CO2 Emissions|Space Heating	MtCO2/yr	Renovated - advanced	0	2.18642	4.27357	7.28704	7.83917	8.15955	9.01735	9.85887
SSP3	AFR	CO2 Emissions|Space Heating	MtCO2/yr	Slum	1.95514	2.24814	2.51885	2.72826	2.89017	3.24858	3.90979	4.57741
SSP3	AFR	CO2 Emissions|Space Heating	MtCO2/yr	Existing <1945	0.291754	0.215735	0.196685	0.180189	0.163468	0.151251	0.140883	0.130634
SSP3	AFR	CO2 Emissions|Space Heating	MtCO2/yr	Existing 1946-1990	1.85215	1.3711	1.2257	1.10277	0.977926	0.856136	0.739475	0.61817
SSP3	AFR	CO2 Emissions|Space Heating	MtCO2/yr	Existing 1991-2015	2.97513	2.47284	2.32949	2.2368	2.13413	2.02932	1.92017	1.77823
SSP3	AFR	CO2 Emissions|Space Heating	MtCO2/yr	New - standard	0	0.651839	1.36355	2.10065	2.8624	3.66919	4.54929	5.45432
SSP3	AFR	CO2 Emissions|Space Heating	MtCO2/yr	New - advanced	0	0	0	0	0	0	0	0
SSP3	AFR	CO2 Emissions|Space Heating	MtCO2/yr	Renovated - standard	0	0.300938	0.373318	0.403884	0.432378	0.468349	0.514005	0.564679
SSP3	AFR	CO2 Emissions|Space Heating	MtCO2/yr	Renovated - advanced	0	0	0	0	0	0	0	0
SSP3	CPA	CO2 Emissions|Space Heating	MtCO2/yr	Slum	95.1048	90.0226	87.3943	82.4403	73.6572	66.1483	62.9744	60.9311
SSP3	CPA	CO2 Emissions|Space Heating	MtCO2/yr	Existing <1945	74.2536	56.5268	42.1628	32.7539	31.3237	29.8168	28.2635	26.6378
SSP3	CPA	CO2 Emissions|Space Heating	MtCO2/yr	Existing 1946-1990	88.6168	49.2136	22.7884	10.3033	1.2413	0.058236	0.0237139	0.0114785
SSP3	CPA	CO2 Emissions|Space Heating	MtCO2/yr	Existing 1991-2015	170.301	129.031	90.2065	59.8104	40.8587	24.1739	10.2151	1.95072
SSP3	CPA	CO2 Emissions|Space Heating	MtCO2/yr	New - standard	0	13.2637	28.5523	42.7586	54.8235	64.2251	71.1146	75.1958
SSP3	CPA	CO2 Emissions|Space Heating	MtCO2/yr	New - advanced	0	0	0.0347283	0.256691	0.490713	0.693774	0.863511	0.97684
SSP3	CPA	CO2 Emissions|Space Heating	MtCO2/yr	Renovated - standard	0	20.6787	41.4594	55.3512	58.6697	60.763	64.72	66.3641
SSP3	CPA	CO2 Emissions|Space Heating	MtCO2/yr	Renovated - advanced	0	0	0	0	0	0	0	0
SSP3	EEU	CO2 Emissions|Space Heating	MtCO2/yr	Existing <1945	35.0142	26.9196	24.4448	22.8865	21.3935	19.9029	18.441	16.9915
SSP3	EEU	CO2 Emissions|Space Heating	MtCO2/yr	Existing 1946-1990	24.5198	18.1488	15.1949	12.9421	10.6131	8.2257	6.02965	4.09144
SSP3	EEU	CO2 Emissions|Space Heating	MtCO2/yr	Existing 1991-2015	13.9238	11.2811	10.3994	9.86702	9.21569	8.40237	7.44661	6.40619
SSP3	EEU	CO2 Emissions|Space Heating	MtCO2/yr	New - standard	0	0.068215	0.131795	0.206375	0.270157	0.333488	0.397539	0.457064
SSP3	EEU	CO2 Emissions|Space Heating	MtCO2/yr	New - advanced	0	0.698802	1.27581	1.81618	2.3413	2.90663	3.50576	4.07241
SSP3	EEU	CO2 Emissions|Space Heating	MtCO2/yr	Renovated - standard	0	5.0456	6.34194	6.54978	6.97201	7.79047	8.59497	9.23123
SSP3	EEU	CO2 Emissions|Space Heating	MtCO2/yr	Renovated - advanced	0	0.0123311	0.0127986	0.012782	0.0132288	0.0147563	0.0154646	0.0155184
SSP3	FSU	CO2 Emissions|Space Heating	MtCO2/yr	Existing <1945	63.1118	43.898	38.2293	34.3142	30.9239	28.2426	27.8504	31.7909
SSP3	FSU	CO2 Emissions|Space Heating	MtCO2/yr	Existing 1946-1990	86.2369	58.8941	47.4069	39.5041	32.4734	27.1527	25.7575	29.2947
SSP3	FSU	CO2 Emissions|Space Heating	MtCO2/yr	Existing 1991-2015	50.1201	38.1959	35.4804	34.3408	32.9885	31.4554	32.1275	37.8988
SSP3	FSU	CO2 Emissions|Space Heating	MtCO2/yr	New - standard	0	4.77718	7.88832	11.2132	15.0257	19.968	29.5105	50.5983
SSP3	FSU	CO2 Emissions|Space Heating	MtCO2/yr	New - advanced	0	0.0114236	0.0508947	0.232811	0.450597	0.735579	1.2887	2.54621
SSP3	FSU	CO2 Emissions|Space Heating	MtCO2/yr	Renovated - standard	0	14.0114	17.9406	21.215	24.3397	27.2968	30.0092	32.3757
SSP3	FSU	CO2 Emissions|Space Heating	MtCO2/yr	Renovated - advanced	0	0.0802506	0.116956	0.148828	0.177542	0.199431	0.219884	0.235197
SSP3	LAC	CO2 Emissions|Space Heating	MtCO2/yr	Slum	1.44261	1.58974	1.63485	1.68301	1.78522	1.87287	1.89841	1.93997
SSP3	LAC	CO2 Emissions|Space Heating	MtCO2/yr	Existing <1945	0.996951	0.739485	0.595339	0.450988	0.3294	0.243651	0.174148	0.112489
SSP3	LAC	CO2 Emissions|Space Heating	MtCO2/yr	Existing 1946-1990	5.23404	4.37845	3.93503	3.43738	2.88999	2.31778	1.78807	1.29641
SSP3	LAC	CO2 Emissions|Space Heating	MtCO2/yr	Existing 1991-2015	7.47395	6.82745	6.65506	6.41704	6.0533	5.53251	4.88489	4.14623
SSP3	LAC	CO2 Emissions|Space Heating	MtCO2/yr	New - standard	0	1.43432	2.8437	4.28304	5.76707	7.2584	8.72502	10.1454
SSP3	LAC	CO2 Emissions|Space Heating	MtCO2/yr	New - advanced	0	0	0	0	0	0	0.000561	0.000561
SSP3	LAC	CO2 Emissions|Space Heating	MtCO2/yr	Renovated - standard	0	1.53063	1.99746	2.41318	2.8321	3.26703	3.69751	4.11802
SSP3	LAC	CO2 Emissions|Space Heating	MtCO2/yr	Renovated - advanced	0	0	0	0	0	0	0	0
SSP3	MEA	CO2 Emissions|Space Heating	MtCO2/yr	Slum	4.83846	4.86515	4.89605	5.05007	5.3048	5.60957	5.89482	5.99014
SSP3	MEA	CO2 Emissions|Space Heating	MtCO2/yr	Existing <1945	1.79142	1.24001	1.08147	0.901124	0.677896	0.473196	0.330084	0.236086
SSP3	MEA	CO2 Emissions|Space Heating	MtCO2/yr	Existing 1946-1990	8.22287	6.06556	5.40665	4.61724	3.53786	2.34872	1.48599	0.923286
SSP3	MEA	CO2 Emissions|Space Heating	MtCO2/yr	Existing 1991-2015	10.7936	8.9926	8.75284	8.50769	7.94466	6.90383	5.52972	4.05556
SSP3	MEA	CO2 Emissions|Space Heating	MtCO2/yr	New - standard	0	2.30574	4.46038	6.6185	8.84814	11.1494	13.4543	15.6699
SSP3	MEA	CO2 Emissions|Space Heating	MtCO2/yr	New - advanced	0	0	0	0	0	0	0.000561	0.0015637
SSP3	MEA	CO2 Emissions|Space Heating	MtCO2/yr	Renovated - standard	0	2.24349	2.86823	3.53185	4.53794	5.84969	7.13023	8.23649
SSP3	MEA	CO2 Emissions|Space Heating	MtCO2/yr	Renovated - advanced	0	0	0	0	0	0	0	0
SSP3	NAM	CO2 Emissions|Space Heating	MtCO2/yr	Existing <1945	123.151	101.932	83.0398	65.8736	49.5161	34.8974	24.7626	17.0495
SSP3	NAM	CO2 Emissions|Space Heating	MtCO2/yr	Existing 1946-1990	131.521	112.109	93.8711	75.9036	57.3815	39.2407	25.5226	14.1996
SSP3	NAM	CO2 Emissions|Space Heating	MtCO2/yr	Existing 1991-2015	129.506	107.822	88.0256	69.1045	49.502	30.4313	18.6817	11.5287
SSP3	NAM	CO2 Emissions|Space Heating	MtCO2/yr	New - standard	0	12.6518	18.202	21.3638	24.4522	27.8736	32.0816	36.791
SSP3	NAM	CO2 Emissions|Space Heating	MtCO2/yr	New - advanced	0	1.5097	3.78	6.3622	9.00502	11.8812	15.2523	19.0496
SSP3	NAM	CO2 Emissions|Space Heating	MtCO2/yr	Renovated - standard	0	26.0608	51.3383	75.5383	98.9367	121.629	138.891	151.797
SSP3	NAM	CO2 Emissions|Space Heating	MtCO2/yr	Renovated - advanced	0	0.142177	0.289658	0.415564	0.524598	0.600625	0.639794	0.670122
SSP3	PAO	CO2 Emissions|Space Heating	MtCO2/yr	Existing <1945	13.5637	10.505	8.97457	7.83217	6.9142	6.14023	5.46807	4.87343
SSP3	PAO	CO2 Emissions|Space Heating	MtCO2/yr	Existing 1946-1990	13.5946	11.3531	10.1657	9.24648	8.48349	7.78698	7.10277	6.4136
SSP3	PAO	CO2 Emissions|Space Heating	MtCO2/yr	Existing 1991-2015	9.11225	7.63924	7.1075	6.72441	6.40726	6.10109	5.76891	5.39434
SSP3	PAO	CO2 Emissions|Space Heating	MtCO2/yr	New - standard	0	0.675118	1.07082	1.39151	1.71162	2.0557	2.41556	2.78714
SSP3	PAO	CO2 Emissions|Space Heating	MtCO2/yr	New - advanced	0	0	0	0.000561	0.00209566	0.00271969	0.00510457	0.00590574
SSP3	PAO	CO2 Emissions|Space Heating	MtCO2/yr	Renovated - standard	0	1.41036	1.63099	1.65839	1.71013	1.81476	1.96162	2.16925
SSP3	PAO	CO2 Emissions|Space Heating	MtCO2/yr	Renovated - advanced	0	0	0	0	0	0	0	0
SSP3	PAS	CO2 Emissions|Space Heating	MtCO2/yr	Slum	1.37813	0.892874	0.537269	0.298911	0.149783	0.0617745	0.0703245	0.00295375
SSP3	PAS	CO2 Emissions|Space Heating	MtCO2/yr	Existing <1945	0.191695	0.107594	0.0593668	0.0347571	0.0213975	0.0147722	0.0112519	0.00886124
SSP3	PAS	CO2 Emissions|Space Heating	MtCO2/yr	Existing 1946-1990	0.815137	0.366142	0.158806	0.0709044	0.034771	0.0201439	0.0126584	0.00886124
SSP3	PAS	CO2 Emissions|Space Heating	MtCO2/yr	Existing 1991-2015	2.3038	1.51114	0.951353	0.586699	0.361083	0.228297	0.150494	0.100427
SSP3	PAS	CO2 Emissions|Space Heating	MtCO2/yr	New - standard	0	3.20053	6.0005	8.45987	10.7469	13.1902	16.0312	18.808
SSP3	PAS	CO2 Emissions|Space Heating	MtCO2/yr	New - advanced	0	0	0	0	0	0	0	0
SSP3	PAS	CO2 Emissions|Space Heating	MtCO2/yr	Renovated - standard	0	0.814185	1.24225	1.46397	1.6008	1.74177	1.92689	2.1075
SSP3	PAS	CO2 Emissions|Space Heating	MtCO2/yr	Renovated - advanced	0	0	0	0	0	0	0	0
SSP3	SAS	CO2 Emissions|Space Heating	MtCO2/yr	Slum	2.64731	3.76819	4.88022	6.05011	7.21028	8.36425	9.52768	10.6175
SSP3	SAS	CO2 Emissions|Space Heating	MtCO2/yr	Existing <1945	0.431599	0.234328	0.146587	0.105613	0.0803661	0.0676784	0.0586199	0.0522172
SSP3	SAS	CO2 Emissions|Space Heating	MtCO2/yr	Existing 1946-1990	0.983644	0.5586	0.36534	0.262954	0.197824	0.155262	0.125056	0.100566
SSP3	SAS	CO2 Emissions|Space Heating	MtCO2/yr	Existing 1991-2015	1.79164	1.24975	0.904328	0.674629	0.519289	0.414032	0.339995	0.284293
SSP3	SAS	CO2 Emissions|Space Heating	MtCO2/yr	New - standard	0	1.85806	4.36829	6.8907	9.47289	12.1741	15.1024	18.1909
SSP3	SAS	CO2 Emissions|Space Heating	MtCO2/yr	New - advanced	0	0	0	0	0	0	0	0
SSP3	SAS	CO2 Emissions|Space Heating	MtCO2/yr	Renovated - standard	0	1.02252	1.60344	1.9894	2.25437	2.47225	2.69065	2.91062
SSP3	SAS	CO2 Emissions|Space Heating	MtCO2/yr	Renovated - advanced	0	0	0	0	0	0	0	0
SSP3	WEU	CO2 Emissions|Space Heating	MtCO2/yr	Existing <1945	194.253	145.711	104.799	85.8552	69.7593	55.876	42.6169	31.4938
SSP3	WEU	CO2 Emissions|Space Heating	MtCO2/yr	Existing 1946-1990	115.464	88.365	65.6144	51.5276	38.197	25.8777	15.486	9.53755
SSP3	WEU	CO2 Emissions|Space Heating	MtCO2/yr	Existing 1991-2015	80.143	74.0073	69.2107	65.3157	61.8471	57.8591	53.0398	46.7694
SSP3	WEU	CO2 Emissions|Space Heating	MtCO2/yr	New - standard	0	0.213741	0.428204	0.695211	0.933726	1.19632	1.53101	1.87286
SSP3	WEU	CO2 Emissions|Space Heating	MtCO2/yr	New - advanced	0	2.37205	4.61756	7.10348	9.34808	11.9364	15.7148	19.893
SSP3	WEU	CO2 Emissions|Space Heating	MtCO2/yr	Renovated - standard	0	14.6099	31.3832	39.9813	42.5404	46.3866	56.1596	65.8177
SSP3	WEU	CO2 Emissions|Space Heating	MtCO2/yr	Renovated - advanced	0	0.0942083	0.185815	0.209898	0.212473	0.219816	0.248876	0.280274

## Sheet: ems_heat_by_fuel
Scenario	Region	Variable	Unit	Fuel_Heating	2015	2020	2025	2030	2035	2040	2045	2050
SSP1	AFR	CO2 Emissions|Space Heating	MtCO2/yr	Biomass	0	0	0	0	0	0	0	0
SSP1	AFR	CO2 Emissions|Space Heating	MtCO2/yr	Coal	1.88822	2.13418	2.30446	2.38297	2.36878	2.26945	2.10485	1.88822
SSP1	AFR	CO2 Emissions|Space Heating	MtCO2/yr	District heating	0	0	0	0	0	0	0	0
SSP1	AFR	CO2 Emissions|Space Heating	MtCO2/yr	Electricity	3.48877	2.94257	2.93245	2.75033	2.50571	2.38301	2.40409	2.42278
SSP1	AFR	CO2 Emissions|Space Heating	MtCO2/yr	Gas	0	0.86394	1.77613	2.83866	3.98647	5.14437	6.2933	7.3951
SSP1	AFR	CO2 Emissions|Space Heating	MtCO2/yr	Oil	1.20945	1.36191	1.46233	1.49532	1.4682	1.39197	1.2571	1.07384
SSP1	AFR	CO2 Emissions|Space Heating	MtCO2/yr	No heating	0	0	0	0	0	0	0	0
SSP1	CPA	CO2 Emissions|Space Heating	MtCO2/yr	Biomass	0	0	0	0	0	0	0	0
SSP1	CPA	CO2 Emissions|Space Heating	MtCO2/yr	Coal	163.444	150.33	120.545	84.4929	58.7665	38.2014	22.529	17.3799
SSP1	CPA	CO2 Emissions|Space Heating	MtCO2/yr	District heating	14.7639	12.9559	13.0558	13.3723	13.0197	12.4755	12.391	12.6586
SSP1	CPA	CO2 Emissions|Space Heating	MtCO2/yr	Electricity	225.476	156.977	66.1079	40.7053	23.4325	12.4502	7.60627	3.72311
SSP1	CPA	CO2 Emissions|Space Heating	MtCO2/yr	Gas	0	30.8056	82.7683	97.3122	105.14	109.871	111.846	111.633
SSP1	CPA	CO2 Emissions|Space Heating	MtCO2/yr	Oil	0	0.018325	0.115081	0.134139	0.13927	0.134872	0.126076	0.113615
SSP1	CPA	CO2 Emissions|Space Heating	MtCO2/yr	No heating	0	0	0	0	0	0	0	0
SSP1	EEU	CO2 Emissions|Space Heating	MtCO2/yr	Biomass	0	0	0	0	0	0	0	0
SSP1	EEU	CO2 Emissions|Space Heating	MtCO2/yr	Coal	29.9239	27.1143	24.5752	23.1742	21.2292	18.8661	16.1246	13.2326
SSP1	EEU	CO2 Emissions|Space Heating	MtCO2/yr	District heating	4.90746	4.65024	4.11172	3.25639	2.73628	2.7833	2.79822	2.74763
SSP1	EEU	CO2 Emissions|Space Heating	MtCO2/yr	Electricity	12.307	8.34333	4.7812	5.08377	4.23592	3.26416	3.2003	3.51501
SSP1	EEU	CO2 Emissions|Space Heating	MtCO2/yr	Gas	20.2499	19.1497	14.9366	13.4797	12.7319	12.4031	12.2248	12.1193
SSP1	EEU	CO2 Emissions|Space Heating	MtCO2/yr	Oil	3.34688	2.83231	1.80978	1.53417	1.1618	0.825358	0.599594	0.480848
SSP1	EEU	CO2 Emissions|Space Heating	MtCO2/yr	No heating	0	0	0	0	0	0	0	0
SSP1	FSU	CO2 Emissions|Space Heating	MtCO2/yr	Biomass	0	0	0	0	0	0	0	0
SSP1	FSU	CO2 Emissions|Space Heating	MtCO2/yr	Coal	16.2788	15.4132	14.2714	11.5554	9.00024	6.56713	5.00245	3.76886
SSP1	FSU	CO2 Emissions|Space Heating	MtCO2/yr	District heating	71.4201	67.8566	68.8884	75.814	85.0988	97.9643	121.182	154.421
SSP1	FSU	CO2 Emissions|Space Heating	MtCO2/yr	Electricity	29.2762	13.7206	9.73886	10.7749	11.0107	10.7178	10.1366	9.6534
SSP1	FSU	CO2 Emissions|Space Heating	MtCO2/yr	Gas	72.1418	62.2811	52.8944	49.7096	47.8741	47.1717	47.6087	48.5349
SSP1	FSU	CO2 Emissions|Space Heating	MtCO2/yr	Oil	22.9055	17.9277	11.7273	8.645	5.47624	2.86603	1.62873	1.08704
SSP1	FSU	CO2 Emissions|Space Heating	MtCO2/yr	No heating	0	0	0	0	0	0	0	0
SSP1	LAC	CO2 Emissions|Space Heating	MtCO2/yr	Biomass	0	0	0	0	0	0	0	0
SSP1	LAC	CO2 Emissions|Space Heating	MtCO2/yr	Coal	0.101222	0.115412	0.124872	0.124872	0.117304	0.10406	0.084194	0.063382
SSP1	LAC	CO2 Emissions|Space Heating	MtCO2/yr	District heating	0	0	0	0	0	0	0	0
SSP1	LAC	CO2 Emissions|Space Heating	MtCO2/yr	Electricity	3.28244	2.2363	2.15169	2.09789	2.01526	1.83192	1.54083	1.28492
SSP1	LAC	CO2 Emissions|Space Heating	MtCO2/yr	Gas	1.93321	5.29977	8.01332	10.8088	13.5953	16.2056	18.4709	20.2925
SSP1	LAC	CO2 Emissions|Space Heating	MtCO2/yr	Oil	9.47036	10.7157	11.0705	10.4628	9.28931	7.65179	5.95929	4.31004
SSP1	LAC	CO2 Emissions|Space Heating	MtCO2/yr	No heating	0	0	0	0	0	0	0	0
SSP1	MEA	CO2 Emissions|Space Heating	MtCO2/yr	Biomass	0	0	0	0	0	0	0	0
SSP1	MEA	CO2 Emissions|Space Heating	MtCO2/yr	Coal	0.02365	0.027434	0.031218	0.030272	0.025542	0.021758	0.013244	0.00946
SSP1	MEA	CO2 Emissions|Space Heating	MtCO2/yr	District heating	0	0	0	0	0	0	0	0
SSP1	MEA	CO2 Emissions|Space Heating	MtCO2/yr	Electricity	9.47363	6.91527	6.59359	6.95678	7.15378	7.08007	6.7036	6.10329
SSP1	MEA	CO2 Emissions|Space Heating	MtCO2/yr	Gas	5.52641	10.3617	15.1779	20.1696	24.9387	29.0261	32.4639	35.1107
SSP1	MEA	CO2 Emissions|Space Heating	MtCO2/yr	Oil	10.3052	11.9069	12.2374	10.4233	7.93179	5.46378	3.59976	2.47607
SSP1	MEA	CO2 Emissions|Space Heating	MtCO2/yr	No heating	0	0	0	0	0	0	0	0
SSP1	NAM	CO2 Emissions|Space Heating	MtCO2/yr	Biomass	0	0	0	0	0	0	0	0
SSP1	NAM	CO2 Emissions|Space Heating	MtCO2/yr	Coal	0	0	0	0	0	0	0	0
SSP1	NAM	CO2 Emissions|Space Heating	MtCO2/yr	District heating	0	0	0	0	0	0	0	0
SSP1	NAM	CO2 Emissions|Space Heating	MtCO2/yr	Electricity	92.6345	75.0211	50.5227	31.6401	29.3848	25.4891	22.3374	20.9733
SSP1	NAM	CO2 Emissions|Space Heating	MtCO2/yr	Gas	219.761	205.014	174.957	135.885	107.254	94.855	92.6239	91.5743
SSP1	NAM	CO2 Emissions|Space Heating	MtCO2/yr	Oil	68.7319	62.3219	50.5836	33.8067	17.6602	7.87682	5.24828	4.65235
SSP1	NAM	CO2 Emissions|Space Heating	MtCO2/yr	No heating	0	0	0	0	0	0	0	0
SSP1	PAO	CO2 Emissions|Space Heating	MtCO2/yr	Biomass	0	0	0	0	0	0	0	0
SSP1	PAO	CO2 Emissions|Space Heating	MtCO2/yr	Coal	1.56752	1.41427	1.30075	1.19196	1.08885	0.987624	0.883564	0.776666
SSP1	PAO	CO2 Emissions|Space Heating	MtCO2/yr	District heating	0.0860456	0.114437	0.171544	0.226666	0.253474	0.270531	0.296139	0.270722
SSP1	PAO	CO2 Emissions|Space Heating	MtCO2/yr	Electricity	7.96225	3.11009	2.32156	1.78489	1.42392	1.24545	1.26006	1.39123
SSP1	PAO	CO2 Emissions|Space Heating	MtCO2/yr	Gas	11.2144	11.2924	10.668	9.94765	9.04893	7.99369	7.03831	6.22373
SSP1	PAO	CO2 Emissions|Space Heating	MtCO2/yr	Oil	15.5359	14.012	12.8656	11.7515	10.649	9.51214	8.24259	6.81323
SSP1	PAO	CO2 Emissions|Space Heating	MtCO2/yr	No heating	0	0	0	0	0	0	0	0
SSP1	PAS	CO2 Emissions|Space Heating	MtCO2/yr	Biomass	0	0	0	0	0	0	0	0
SSP1	PAS	CO2 Emissions|Space Heating	MtCO2/yr	Coal	0	0	0	0	0	0	0	0
SSP1	PAS	CO2 Emissions|Space Heating	MtCO2/yr	District heating	0	0	0	0	0	0	0	0
SSP1	PAS	CO2 Emissions|Space Heating	MtCO2/yr	Electricity	4.42209	6.71871	8.27317	7.78862	6.63848	5.72757	5.54334	5.56543
SSP1	PAS	CO2 Emissions|Space Heating	MtCO2/yr	Gas	0	0	0	0	0	0	0	0
SSP1	PAS	CO2 Emissions|Space Heating	MtCO2/yr	Oil	0	0	0	0	0	0	0	0
SSP1	PAS	CO2 Emissions|Space Heating	MtCO2/yr	No heating	0	0	0	0	0	0	0	0
SSP1	SAS	CO2 Emissions|Space Heating	MtCO2/yr	Biomass	0	0	0	0	0	0	0	0
SSP1	SAS	CO2 Emissions|Space Heating	MtCO2/yr	Coal	0	0	0	0	0	0	0	0
SSP1	SAS	CO2 Emissions|Space Heating	MtCO2/yr	District heating	0	0	0	0	0	0	0	0
SSP1	SAS	CO2 Emissions|Space Heating	MtCO2/yr	Electricity	5.19615	7.06343	9.49012	11.9989	14.9762	16.5178	15.6465	14.3156
SSP1	SAS	CO2 Emissions|Space Heating	MtCO2/yr	Gas	0	0	0	0	0	0	0	0
SSP1	SAS	CO2 Emissions|Space Heating	MtCO2/yr	Oil	0	0	0	0	0	0	0	0
SSP1	SAS	CO2 Emissions|Space Heating	MtCO2/yr	No heating	0	0	0	0	0	0	0	0
SSP1	WEU	CO2 Emissions|Space Heating	MtCO2/yr	Biomass	0	0	0	0	0	0	0	0
SSP1	WEU	CO2 Emissions|Space Heating	MtCO2/yr	Coal	32.3825	28.0848	23.0228	19.7894	14.7567	9.968	7.59827	5.86993
SSP1	WEU	CO2 Emissions|Space Heating	MtCO2/yr	District heating	2.9643	2.2928	2.48833	2.40269	1.22894	0.26756	0.183206	0.305104
SSP1	WEU	CO2 Emissions|Space Heating	MtCO2/yr	Electricity	50.7662	39.0475	29.5247	21.7568	20.6507	21.5362	26.0527	29.973
SSP1	WEU	CO2 Emissions|Space Heating	MtCO2/yr	Gas	200.601	170.532	124.545	90.8377	76.6528	69.7508	64.1431	59.5255
SSP1	WEU	CO2 Emissions|Space Heating	MtCO2/yr	Oil	107.373	89.7778	62.4655	43.1891	30.0303	22.8286	17.7415	13.3369
SSP1	WEU	CO2 Emissions|Space Heating	MtCO2/yr	No heating	0	0	0	0	0	0	0	0
SSP2	AFR	CO2 Emissions|Space Heating	MtCO2/yr	Biomass	0	0	0	0	0	0	0	0
SSP2	AFR	CO2 Emissions|Space Heating	MtCO2/yr	Coal	1.89011	1.9989	2.06512	2.08025	2.04525	1.95633	1.80591	1.59685
SSP2	AFR	CO2 Emissions|Space Heating	MtCO2/yr	District heating	0	0	0	0	0	0	0	0
SSP2	AFR	CO2 Emissions|Space Heating	MtCO2/yr	Electricity	4.22011	3.73448	3.91389	3.98038	3.82317	3.61547	3.60136	3.88613
SSP2	AFR	CO2 Emissions|Space Heating	MtCO2/yr	Gas	0	0.590172	1.053	1.55902	2.25522	3.17302	4.09137	4.97383
SSP2	AFR	CO2 Emissions|Space Heating	MtCO2/yr	Oil	1.20945	1.5459	1.91093	2.30675	2.63953	2.8587	3.06687	3.26552
SSP2	AFR	CO2 Emissions|Space Heating	MtCO2/yr	No heating	0	0	0	0	0	0	0	0
SSP2	CPA	CO2 Emissions|Space Heating	MtCO2/yr	Biomass	0	0	0	0	0	0	0	0
SSP2	CPA	CO2 Emissions|Space Heating	MtCO2/yr	Coal	162.768	144.797	124.734	98.2667	71.3227	51.6734	33.5792	25.9611
SSP2	CPA	CO2 Emissions|Space Heating	MtCO2/yr	District heating	14.5199	12.398	12.717	13.8514	13.9845	13.9026	14.457	15.892
SSP2	CPA	CO2 Emissions|Space Heating	MtCO2/yr	Electricity	242.411	166.536	113.733	71.3437	52.2176	37.0052	25.297	17.5549
SSP2	CPA	CO2 Emissions|Space Heating	MtCO2/yr	Gas	0	27.1838	55.9861	83.3135	95.1243	102.796	108.642	112.607
SSP2	CPA	CO2 Emissions|Space Heating	MtCO2/yr	Oil	0	4.08721	12.1773	21.007	28.93	35.1547	39.0718	40.7357
SSP2	CPA	CO2 Emissions|Space Heating	MtCO2/yr	No heating	0	0	0	0	0	0	0	0
SSP2	EEU	CO2 Emissions|Space Heating	MtCO2/yr	Biomass	0	0	0	0	0	0	0	0
SSP2	EEU	CO2 Emissions|Space Heating	MtCO2/yr	Coal	29.8283	27.6081	26.3764	24.9366	22.9916	20.5736	17.8718	15.0896
SSP2	EEU	CO2 Emissions|Space Heating	MtCO2/yr	District heating	4.74096	4.52895	4.18473	3.62513	3.07918	2.91242	3.21711	3.48949
SSP2	EEU	CO2 Emissions|Space Heating	MtCO2/yr	Electricity	14.6395	8.8513	5.46375	4.97579	4.39816	3.78531	3.97132	4.61936
SSP2	EEU	CO2 Emissions|Space Heating	MtCO2/yr	Gas	20.1842	19.8504	18.4143	16.5259	15.1773	14.3279	13.5078	12.8935
SSP2	EEU	CO2 Emissions|Space Heating	MtCO2/yr	Oil	3.33588	2.7766	2.35586	2.16895	1.7504	1.13248	0.729335	0.50577
SSP2	EEU	CO2 Emissions|Space Heating	MtCO2/yr	No heating	0	0	0	0	0	0	0	0
SSP2	FSU	CO2 Emissions|Space Heating	MtCO2/yr	Biomass	0	0	0	0	0	0	0	0
SSP2	FSU	CO2 Emissions|Space Heating	MtCO2/yr	Coal	16.188	15.1209	14.1701	12.2791	9.85827	7.63327	6.20008	4.81419
SSP2	FSU	CO2 Emissions|Space Heating	MtCO2/yr	District heating	70.7424	64.26	62.5499	67.0105	75.5709	90.1814	114.818	151.302
SSP2	FSU	CO2 Emissions|Space Heating	MtCO2/yr	Electricity	29.0165	6.48477	8.07114	9.70652	11.0105	12.1851	12.7561	12.9901
SSP2	FSU	CO2 Emissions|Space Heating	MtCO2/yr	Gas	71.7362	66.7854	62.5824	60.6183	58.91	57.3701	55.778	54.5606
SSP2	FSU	CO2 Emissions|Space Heating	MtCO2/yr	Oil	22.7765	18.6519	15.0514	12.0681	8.8048	5.54954	3.19955	1.68517
SSP2	FSU	CO2 Emissions|Space Heating	MtCO2/yr	No heating	0	0	0	0	0	0	0	0
SSP2	LAC	CO2 Emissions|Space Heating	MtCO2/yr	Biomass	0	0	0	0	0	0	0	0
SSP2	LAC	CO2 Emissions|Space Heating	MtCO2/yr	Coal	0.100276	0.106898	0.109736	0.10879	0.103114	0.093654	0.081356	0.06622
SSP2	LAC	CO2 Emissions|Space Heating	MtCO2/yr	District heating	0	0	0	0	0	0	0	0
SSP2	LAC	CO2 Emissions|Space Heating	MtCO2/yr	Electricity	3.34122	2.15791	2.07398	2.11286	2.17313	2.1691	2.08649	2.06433
SSP2	LAC	CO2 Emissions|Space Heating	MtCO2/yr	Gas	1.92872	4.75672	6.43467	8.23885	9.95943	11.5639	13.2267	14.8749
SSP2	LAC	CO2 Emissions|Space Heating	MtCO2/yr	Oil	9.44837	10.5112	11.1379	11.1922	11.1548	11.0185	10.4636	9.65874
SSP2	LAC	CO2 Emissions|Space Heating	MtCO2/yr	No heating	0	0	0	0	0	0	0	0
SSP2	MEA	CO2 Emissions|Space Heating	MtCO2/yr	Biomass	0	0	0	0	0	0	0	0
SSP2	MEA	CO2 Emissions|Space Heating	MtCO2/yr	Coal	0.02365	0.026488	0.026488	0.027434	0.025542	0.020812	0.017028	0.012298
SSP2	MEA	CO2 Emissions|Space Heating	MtCO2/yr	District heating	0	0	0	0	0	0	0	0
SSP2	MEA	CO2 Emissions|Space Heating	MtCO2/yr	Electricity	9.86733	6.48931	6.38381	6.64118	6.98071	7.30537	7.49441	7.38212
SSP2	MEA	CO2 Emissions|Space Heating	MtCO2/yr	Gas	5.51575	9.1572	11.5398	14.043	17.2883	21.0897	24.4416	27.2354
SSP2	MEA	CO2 Emissions|Space Heating	MtCO2/yr	Oil	10.2855	11.9464	13.3237	14.023	13.323	11.7353	10.6351	10.1176
SSP2	MEA	CO2 Emissions|Space Heating	MtCO2/yr	No heating	0	0	0	0	0	0	0	0
SSP2	NAM	CO2 Emissions|Space Heating	MtCO2/yr	Biomass	0	0	0	0	0	0	0	0
SSP2	NAM	CO2 Emissions|Space Heating	MtCO2/yr	Coal	0	0	0	0	0	0	0	0
SSP2	NAM	CO2 Emissions|Space Heating	MtCO2/yr	District heating	0	0	0	0	0	0	0	0
SSP2	NAM	CO2 Emissions|Space Heating	MtCO2/yr	Electricity	91.3621	68.0284	58.7072	54.6625	49.9403	49.0679	50.8053	51.8398
SSP2	NAM	CO2 Emissions|Space Heating	MtCO2/yr	Gas	219.761	220.697	201.601	166.181	131.075	100.992	87.5727	85.6759
SSP2	NAM	CO2 Emissions|Space Heating	MtCO2/yr	Oil	68.7319	62.7463	58.0111	52.227	39.5006	18.8652	7.7808	4.90963
SSP2	NAM	CO2 Emissions|Space Heating	MtCO2/yr	No heating	0	0	0	0	0	0	0	0
SSP2	PAO	CO2 Emissions|Space Heating	MtCO2/yr	Biomass	0	0	0	0	0	0	0	0
SSP2	PAO	CO2 Emissions|Space Heating	MtCO2/yr	Coal	1.56279	1.44927	1.36981	1.28561	1.20142	1.11344	1.01695	0.90816
SSP2	PAO	CO2 Emissions|Space Heating	MtCO2/yr	District heating	0.106787	0.0957183	0.0703697	0.0455639	0.0352339	0.0342606	0.0321755	0.026583
SSP2	PAO	CO2 Emissions|Space Heating	MtCO2/yr	Electricity	7.83018	3.32444	2.60144	2.14153	1.78411	1.60631	1.70536	1.96759
SSP2	PAO	CO2 Emissions|Space Heating	MtCO2/yr	Gas	11.183	11.8315	11.5039	10.935	10.1827	9.30755	8.49074	7.76592
SSP2	PAO	CO2 Emissions|Space Heating	MtCO2/yr	Oil	15.492	14.3587	13.5444	12.6963	11.7646	10.6512	9.35894	7.91273
SSP2	PAO	CO2 Emissions|Space Heating	MtCO2/yr	No heating	0	0	0	0	0	0	0	0
SSP2	PAS	CO2 Emissions|Space Heating	MtCO2/yr	Biomass	0	0	0	0	0	0	0	0
SSP2	PAS	CO2 Emissions|Space Heating	MtCO2/yr	Coal	0	0	0	0	0	0	0	0
SSP2	PAS	CO2 Emissions|Space Heating	MtCO2/yr	District heating	0	0	0	0	0	0	0	0
SSP2	PAS	CO2 Emissions|Space Heating	MtCO2/yr	Electricity	4.7118	6.72784	8.35551	7.80124	7.37418	7.13958	7.15396	7.04641
SSP2	PAS	CO2 Emissions|Space Heating	MtCO2/yr	Gas	0	0	0	0	0	0	0	0
SSP2	PAS	CO2 Emissions|Space Heating	MtCO2/yr	Oil	0	0	0	0	0	0	0	0
SSP2	PAS	CO2 Emissions|Space Heating	MtCO2/yr	No heating	0	0	0	0	0	0	0	0
SSP2	SAS	CO2 Emissions|Space Heating	MtCO2/yr	Biomass	0	0	0	0	0	0	0	0
SSP2	SAS	CO2 Emissions|Space Heating	MtCO2/yr	Coal	0	0	0	0	0	0	0	0
SSP2	SAS	CO2 Emissions|Space Heating	MtCO2/yr	District heating	0	0	0	0	0	0	0	0
SSP2	SAS	CO2 Emissions|Space Heating	MtCO2/yr	Electricity	5.32202	7.97293	11.0772	14.0008	16.8472	19.3955	28.5295	39.9769
SSP2	SAS	CO2 Emissions|Space Heating	MtCO2/yr	Gas	0	0	0	0	0	0	0	0
SSP2	SAS	CO2 Emissions|Space Heating	MtCO2/yr	Oil	0	0	0	0	0	0	0	0
SSP2	SAS	CO2 Emissions|Space Heating	MtCO2/yr	No heating	0	0	0	0	0	0	0	0
SSP2	WEU	CO2 Emissions|Space Heating	MtCO2/yr	Biomass	0	0	0	0	0	0	0	0
SSP2	WEU	CO2 Emissions|Space Heating	MtCO2/yr	Coal	32.2671	28.6184	25.8722	23.0956	18.4044	12.8457	8.98416	7.45353
SSP2	WEU	CO2 Emissions|Space Heating	MtCO2/yr	District heating	4.88303	4.97375	5.47655	5.60724	4.6037	3.09564	2.02771	1.71439
SSP2	WEU	CO2 Emissions|Space Heating	MtCO2/yr	Electricity	48.3751	38.9894	34.8362	27.1387	25.3428	26.021	34.4579	43.7489
SSP2	WEU	CO2 Emissions|Space Heating	MtCO2/yr	Gas	199.887	170.124	144.693	117.695	102.42	94.3327	88.983	82.9096
SSP2	WEU	CO2 Emissions|Space Heating	MtCO2/yr	Oil	106.991	88.4343	71.944	54.0998	38.5389	29.029	24.3649	20.0637
SSP2	WEU	CO2 Emissions|Space Heating	MtCO2/yr	No heating	0	0	0	0	0	0	0	0
SSP3	AFR	CO2 Emissions|Space Heating	MtCO2/yr	Biomass	0	0	0	0	0	0	0	0
SSP3	AFR	CO2 Emissions|Space Heating	MtCO2/yr	Coal	1.89105	1.87024	1.83051	1.76618	1.68483	1.58455	1.46914	1.34237
SSP3	AFR	CO2 Emissions|Space Heating	MtCO2/yr	District heating	0	0	0	0	0	0	0	0
SSP3	AFR	CO2 Emissions|Space Heating	MtCO2/yr	Electricity	3.9722	3.35284	3.49261	3.6776	3.83464	4.25873	5.08058	5.91388
SSP3	AFR	CO2 Emissions|Space Heating	MtCO2/yr	Gas	0	0.490875	0.797742	1.08778	1.40923	1.76995	2.13797	2.50711
SSP3	AFR	CO2 Emissions|Space Heating	MtCO2/yr	Oil	1.21092	1.54663	1.88674	2.22099	2.53178	2.80959	3.08593	3.36007
SSP3	AFR	CO2 Emissions|Space Heating	MtCO2/yr	No heating	0	0	0	0	0	0	0	0
SSP3	CPA	CO2 Emissions|Space Heating	MtCO2/yr	Biomass	0	0	0	0	0	0	0	0
SSP3	CPA	CO2 Emissions|Space Heating	MtCO2/yr	Coal	162.159	135.425	112.683	89.2958	65.6694	49.7246	36.3141	27.347
SSP3	CPA	CO2 Emissions|Space Heating	MtCO2/yr	District heating	12.0884	10.192	10.0523	10.3722	10.4138	10.526	10.8873	11.7801
SSP3	CPA	CO2 Emissions|Space Heating	MtCO2/yr	Electricity	254.03	182.625	126.24	95.21	83.0379	74.0087	70.4404	68.1979
SSP3	CPA	CO2 Emissions|Space Heating	MtCO2/yr	Gas	0	25.6422	51.166	68.2563	74.5361	78.9557	84.5046	87.1283
SSP3	CPA	CO2 Emissions|Space Heating	MtCO2/yr	Oil	0	4.85246	12.4573	20.5401	27.4076	32.6639	36.0284	37.6146
SSP3	CPA	CO2 Emissions|Space Heating	MtCO2/yr	No heating	0	0	0	0	0	0	0	0
SSP3	EEU	CO2 Emissions|Space Heating	MtCO2/yr	Biomass	0	0	0	0	0	0	0	0
SSP3	EEU	CO2 Emissions|Space Heating	MtCO2/yr	Coal	29.6807	27.6544	25.9412	24.0946	22.1402	20.093	17.9352	15.7045
SSP3	EEU	CO2 Emissions|Space Heating	MtCO2/yr	District heating	4.57013	4.1307	3.60187	2.96826	2.71004	2.82084	2.7776	2.70813
SSP3	EEU	CO2 Emissions|Space Heating	MtCO2/yr	Electricity	15.8034	6.24886	5.02869	5.16126	5.42037	6.06386	6.84063	7.44366
SSP3	EEU	CO2 Emissions|Space Heating	MtCO2/yr	Gas	20.0838	21.1755	20.5292	19.571	18.3296	16.7206	15.3624	14.2421
SSP3	EEU	CO2 Emissions|Space Heating	MtCO2/yr	Oil	3.31976	2.96498	2.70037	2.4856	2.21879	1.87795	1.51511	1.16694
SSP3	EEU	CO2 Emissions|Space Heating	MtCO2/yr	No heating	0	0	0	0	0	0	0	0
SSP3	FSU	CO2 Emissions|Space Heating	MtCO2/yr	Biomass	0	0	0	0	0	0	0	0
SSP3	FSU	CO2 Emissions|Space Heating	MtCO2/yr	Coal	16.1009	14.3641	13.2856	12.1079	10.7958	9.25566	8.05046	6.78944
SSP3	FSU	CO2 Emissions|Space Heating	MtCO2/yr	District heating	63.4953	50.2855	45.2011	46.5295	49.3969	55.1134	72.8512	115.911
SSP3	FSU	CO2 Emissions|Space Heating	MtCO2/yr	Electricity	25.8677	6.64921	7.18226	7.7976	8.57754	9.512	10.3832	11.2671
SSP3	FSU	CO2 Emissions|Space Heating	MtCO2/yr	Gas	71.3508	68.7365	63.7835	59.4553	55.461	51.8179	48.8429	46.3089
SSP3	FSU	CO2 Emissions|Space Heating	MtCO2/yr	Oil	22.6541	19.8328	17.6609	15.0785	12.148	9.35161	6.63585	4.46324
SSP3	FSU	CO2 Emissions|Space Heating	MtCO2/yr	No heating	0	0	0	0	0	0	0	0
SSP3	LAC	CO2 Emissions|Space Heating	MtCO2/yr	Biomass	0	0	0	0	0	0	0	0
SSP3	LAC	CO2 Emissions|Space Heating	MtCO2/yr	Coal	0.100276	0.09933	0.096492	0.091762	0.086086	0.077572	0.068112	0.05676
SSP3	LAC	CO2 Emissions|Space Heating	MtCO2/yr	District heating	0	0	0	0	0	0	0	0
SSP3	LAC	CO2 Emissions|Space Heating	MtCO2/yr	Electricity	3.68692	2.33397	2.12866	2.10866	2.2073	2.31693	2.35965	2.4305
SSP3	LAC	CO2 Emissions|Space Heating	MtCO2/yr	Gas	1.92591	3.89053	4.77187	5.5999	6.48011	7.40913	8.30953	9.1645
SSP3	LAC	CO2 Emissions|Space Heating	MtCO2/yr	Oil	9.43444	10.1762	10.6644	10.8843	10.8836	10.6886	10.4313	10.1073
SSP3	LAC	CO2 Emissions|Space Heating	MtCO2/yr	No heating	0	0	0	0	0	0	0	0
SSP3	MEA	CO2 Emissions|Space Heating	MtCO2/yr	Biomass	0	0	0	0	0	0	0	0
SSP3	MEA	CO2 Emissions|Space Heating	MtCO2/yr	Coal	0.02365	0.024596	0.02365	0.022704	0.021758	0.017974	0.015136	0.012298
SSP3	MEA	CO2 Emissions|Space Heating	MtCO2/yr	District heating	0	0	0	0	0	0	0	0
SSP3	MEA	CO2 Emissions|Space Heating	MtCO2/yr	Electricity	9.84589	5.97896	5.67835	5.7688	6.03056	6.37719	6.71334	6.84744
SSP3	MEA	CO2 Emissions|Space Heating	MtCO2/yr	Gas	5.50678	8.22875	9.38104	10.5928	12.2236	14.2376	16.2656	18.1444
SSP3	MEA	CO2 Emissions|Space Heating	MtCO2/yr	Oil	10.2701	11.4802	12.3826	12.8422	12.5753	11.7016	10.8315	10.1088
SSP3	MEA	CO2 Emissions|Space Heating	MtCO2/yr	No heating	0	0	0	0	0	0	0	0
SSP3	NAM	CO2 Emissions|Space Heating	MtCO2/yr	Biomass	0	0	0	0	0	0	0	0
SSP3	NAM	CO2 Emissions|Space Heating	MtCO2/yr	Coal	0	0	0	0	0	0	0	0
SSP3	NAM	CO2 Emissions|Space Heating	MtCO2/yr	District heating	0	0	0	0	0	0	0	0
SSP3	NAM	CO2 Emissions|Space Heating	MtCO2/yr	Electricity	95.6851	71.8118	63.5895	67.872	76.6885	91.1023	108.636	125.625
SSP3	NAM	CO2 Emissions|Space Heating	MtCO2/yr	Gas	219.761	224.41	212.66	189.371	166.804	148.211	130.103	115.183
SSP3	NAM	CO2 Emissions|Space Heating	MtCO2/yr	Oil	68.7319	66.0059	62.2969	57.3184	45.8257	27.2405	17.0921	10.2774
SSP3	NAM	CO2 Emissions|Space Heating	MtCO2/yr	No heating	0	0	0	0	0	0	0	0
SSP3	PAO	CO2 Emissions|Space Heating	MtCO2/yr	Biomass	0	0	0	0	0	0	0	0
SSP3	PAO	CO2 Emissions|Space Heating	MtCO2/yr	Coal	1.55995	1.42184	1.32345	1.22885	1.13709	1.05006	0.965866	0.882618
SSP3	PAO	CO2 Emissions|Space Heating	MtCO2/yr	District heating	0.133693	0.12539	0.0851405	0.0448881	0.0331521	0.0355869	0.0291247	0.0179549
SSP3	PAO	CO2 Emissions|Space Heating	MtCO2/yr	Electricity	7.95388	4.50804	3.24221	2.62374	2.46627	2.59587	2.88611	3.29469
SSP3	PAO	CO2 Emissions|Space Heating	MtCO2/yr	Gas	11.1611	11.4326	11.1774	10.7802	10.3319	9.84948	9.34346	8.81219
SSP3	PAO	CO2 Emissions|Space Heating	MtCO2/yr	Oil	15.4619	14.0949	13.1214	12.1759	11.2603	10.3705	9.49748	8.63621
SSP3	PAO	CO2 Emissions|Space Heating	MtCO2/yr	No heating	0	0	0	0	0	0	0	0
SSP3	PAS	CO2 Emissions|Space Heating	MtCO2/yr	Biomass	0	0	0	0	0	0	0	0
SSP3	PAS	CO2 Emissions|Space Heating	MtCO2/yr	Coal	0	0	0	0	0	0	0	0
SSP3	PAS	CO2 Emissions|Space Heating	MtCO2/yr	District heating	0	0	0	0	0	0	0	0
SSP3	PAS	CO2 Emissions|Space Heating	MtCO2/yr	Electricity	4.68877	6.89247	8.94954	10.9151	12.9147	15.257	18.2028	21.0366
SSP3	PAS	CO2 Emissions|Space Heating	MtCO2/yr	Gas	0	0	0	0	0	0	0	0
SSP3	PAS	CO2 Emissions|Space Heating	MtCO2/yr	Oil	0	0	0	0	0	0	0	0
SSP3	PAS	CO2 Emissions|Space Heating	MtCO2/yr	No heating	0	0	0	0	0	0	0	0
SSP3	SAS	CO2 Emissions|Space Heating	MtCO2/yr	Biomass	0	0	0	0	0	0	0	0
SSP3	SAS	CO2 Emissions|Space Heating	MtCO2/yr	Coal	0	0	0	0	0	0	0	0
SSP3	SAS	CO2 Emissions|Space Heating	MtCO2/yr	District heating	0	0	0	0	0	0	0	0
SSP3	SAS	CO2 Emissions|Space Heating	MtCO2/yr	Electricity	5.85419	8.69144	12.2682	15.9734	19.735	23.6476	27.8444	32.1561
SSP3	SAS	CO2 Emissions|Space Heating	MtCO2/yr	Gas	0	0	0	0	0	0	0	0
SSP3	SAS	CO2 Emissions|Space Heating	MtCO2/yr	Oil	0	0	0	0	0	0	0	0
SSP3	SAS	CO2 Emissions|Space Heating	MtCO2/yr	No heating	0	0	0	0	0	0	0	0
SSP3	WEU	CO2 Emissions|Space Heating	MtCO2/yr	Biomass	0	0	0	0	0	0	0	0
SSP3	WEU	CO2 Emissions|Space Heating	MtCO2/yr	Coal	32.1886	29.115	26.6611	24.0738	21.075	17.8293	14.2203	10.5167
SSP3	WEU	CO2 Emissions|Space Heating	MtCO2/yr	District heating	3.11243	2.55104	2.63098	2.57925	1.92459	1.5265	2.009	2.53795
SSP3	WEU	CO2 Emissions|Space Heating	MtCO2/yr	Electricity	48.4263	41.8388	36.7463	31.701	29.2402	30.9348	41.0926	51.8245
SSP3	WEU	CO2 Emissions|Space Heating	MtCO2/yr	Gas	199.402	165.919	141.069	131.489	119.733	108.577	96.3108	86.4411
SSP3	WEU	CO2 Emissions|Space Heating	MtCO2/yr	Oil	106.731	85.9501	69.1314	60.8456	50.8658	40.4843	31.1642	24.3444
SSP3	WEU	CO2 Emissions|Space Heating	MtCO2/yr	No heating	0	0	0	0	0	0	0	0

[truncated: 1 more sheets: ems_cool_by_cohort]
